# Supplementary material for: Uptake of infant and preschool immunisations in Scotland and England during the COVID-19 pandemic: An observational study of routinely collected data
Source: PubMed Central journal article supplement (PMC8863286; doi:10.1371/journal.pmed.1003916), 2022-02-22
Supplement: pmed.1003916.s015.pdf [file pmed.1003916.s015.pdf]

Uptake of infant and pre-school immunisations in Scotland and England during the COVID-19 pandemic: an observational study of routinely collected data  
 --Manuscript Draft--

|                                             |                                                                                                                                                                                                                                                                                                                                                                                                                                                                                                                                                                                                                                                                                                                                                                                                                                                                                                                                                                                                                                                                                                                                                                                                                                                                                                                                                                                                                                                                                                                                                                                                                                                                                                                                                                                                                                                                                                                                                                                                                                                                                                                                                                                                                                                                                                                                                                                                                                                                                                                                                                                                                                                                                                                                                                                                                                                                                                                                                                                                                                                                                                                                                                                                                                                                                                                                      |
|---------------------------------------------|--------------------------------------------------------------------------------------------------------------------------------------------------------------------------------------------------------------------------------------------------------------------------------------------------------------------------------------------------------------------------------------------------------------------------------------------------------------------------------------------------------------------------------------------------------------------------------------------------------------------------------------------------------------------------------------------------------------------------------------------------------------------------------------------------------------------------------------------------------------------------------------------------------------------------------------------------------------------------------------------------------------------------------------------------------------------------------------------------------------------------------------------------------------------------------------------------------------------------------------------------------------------------------------------------------------------------------------------------------------------------------------------------------------------------------------------------------------------------------------------------------------------------------------------------------------------------------------------------------------------------------------------------------------------------------------------------------------------------------------------------------------------------------------------------------------------------------------------------------------------------------------------------------------------------------------------------------------------------------------------------------------------------------------------------------------------------------------------------------------------------------------------------------------------------------------------------------------------------------------------------------------------------------------------------------------------------------------------------------------------------------------------------------------------------------------------------------------------------------------------------------------------------------------------------------------------------------------------------------------------------------------------------------------------------------------------------------------------------------------------------------------------------------------------------------------------------------------------------------------------------------------------------------------------------------------------------------------------------------------------------------------------------------------------------------------------------------------------------------------------------------------------------------------------------------------------------------------------------------------------------------------------------------------------------------------------------------------|
| <b>Manuscript Number:</b>                   | PMEDICINE-D-21-03163R1                                                                                                                                                                                                                                                                                                                                                                                                                                                                                                                                                                                                                                                                                                                                                                                                                                                                                                                                                                                                                                                                                                                                                                                                                                                                                                                                                                                                                                                                                                                                                                                                                                                                                                                                                                                                                                                                                                                                                                                                                                                                                                                                                                                                                                                                                                                                                                                                                                                                                                                                                                                                                                                                                                                                                                                                                                                                                                                                                                                                                                                                                                                                                                                                                                                                                                               |
| <b>Full Title:</b>                          | Uptake of infant and pre-school immunisations in Scotland and England during the COVID-19 pandemic: an observational study of routinely collected data                                                                                                                                                                                                                                                                                                                                                                                                                                                                                                                                                                                                                                                                                                                                                                                                                                                                                                                                                                                                                                                                                                                                                                                                                                                                                                                                                                                                                                                                                                                                                                                                                                                                                                                                                                                                                                                                                                                                                                                                                                                                                                                                                                                                                                                                                                                                                                                                                                                                                                                                                                                                                                                                                                                                                                                                                                                                                                                                                                                                                                                                                                                                                                               |
| <b>Short Title:</b>                         | Uptake of routine childhood immunisation during the COVID-19 pandemic                                                                                                                                                                                                                                                                                                                                                                                                                                                                                                                                                                                                                                                                                                                                                                                                                                                                                                                                                                                                                                                                                                                                                                                                                                                                                                                                                                                                                                                                                                                                                                                                                                                                                                                                                                                                                                                                                                                                                                                                                                                                                                                                                                                                                                                                                                                                                                                                                                                                                                                                                                                                                                                                                                                                                                                                                                                                                                                                                                                                                                                                                                                                                                                                                                                                |
| <b>Article Type:</b>                        | Research Article                                                                                                                                                                                                                                                                                                                                                                                                                                                                                                                                                                                                                                                                                                                                                                                                                                                                                                                                                                                                                                                                                                                                                                                                                                                                                                                                                                                                                                                                                                                                                                                                                                                                                                                                                                                                                                                                                                                                                                                                                                                                                                                                                                                                                                                                                                                                                                                                                                                                                                                                                                                                                                                                                                                                                                                                                                                                                                                                                                                                                                                                                                                                                                                                                                                                                                                     |
| <b>Abstract:</b>                            | <p><b>Background</b><br/>         In 2020, the COVID-19 pandemic and control measures such as national lockdowns threatened to disrupt routine childhood immunisation programmes. Initial reports from the early weeks of lockdown in the UK and worldwide suggested that uptake could fall putting children at risk from multiple other infectious diseases. In Scotland and England, enhanced surveillance of national data for childhood immunisations was established to inform and rapidly assess the impact of the pandemic on infant and preschool immunisation uptake rates.</p> <p><b>Methods and findings</b><br/>         We undertook an observational study using routinely collected data for the year prior to the pandemic (2019), and immediately before, during and after the first period of the UK 'lockdown' in 2020. Data were obtained for Scotland from the Public Health Scotland "COVID19 wider impacts on the health care system" dashboard ( <a href="https://scotland.shinyapps.io/phs-covid-wider-impact/">https://scotland.shinyapps.io/phs-covid-wider-impact/</a> ) and for England from ImmForm.</p> <p>Five vaccinations delivered at different ages were evaluated; three doses of the '6-in-1' DTaP/IPV/Hib/HepB vaccine and two doses of MMR. Uptake in the periods in 2020 compared to that in the baseline year of 2019 using binary logistic regression analysis. For Scotland, we analysed timely uptake of immunisations, defined as uptake within four weeks of the child becoming eligible by age for each immunisation and data were also analysed by geographical region and indices of deprivation. For both Scotland and England, we assessed whether immunisations were up to date at approximately 6 months (all doses 6-in-1) and 16-18 months (first MMR) of age.</p> <p>We found that uptake rates within four weeks of eligibility in Scotland for all the five vaccine visits were higher during the 2020 lockdown period than in 2019. The difference ranged from 1.3% for the first dose of the 6-in-1 vaccine (95.3 vs 94%, OR 1.28, CI 1.18-1.39) to 14.3% for the second MMR dose (66.1 vs 51.8 %, OR 1.8, CI 1.74-1.87). Significant increases in uptake were seen across all deprivation levels, though, for MMR, there was evidence of greater improvement for children living in the least deprived areas.</p> <p>In England, fewer children who had been due to receive their immunisations during the lockdown period were up to date at 6 months (6-in-1) or 18 months (first dose MMR). The fall in percentage uptake ranged from 0.5% for first 6-in1 (95.8 vs 96.3%, OR 0.89, CI 0.86-0.91) to 2.1% for third 6-in-1 (86.6 vs 88.7%, OR 0.82, CI 0.81-0.83).</p> <p><b>Conclusions</b><br/>         This study suggests that the national lockdown in Scotland was associated with a positive effect on timely childhood immunisation uptake, however in England a lower percentage of children were up to date at 6 and 18 months. Reason for the improve uptake in Scotland may include active measures taken to promote immunisation at local and national level during this period. Promoting immunisation uptake and addressing potential vaccine hesitancy is particularly important given the ongoing pandemic and COVID-19 vaccination campaigns.</p> |
| <b>Additional Information:</b>              |                                                                                                                                                                                                                                                                                                                                                                                                                                                                                                                                                                                                                                                                                                                                                                                                                                                                                                                                                                                                                                                                                                                                                                                                                                                                                                                                                                                                                                                                                                                                                                                                                                                                                                                                                                                                                                                                                                                                                                                                                                                                                                                                                                                                                                                                                                                                                                                                                                                                                                                                                                                                                                                                                                                                                                                                                                                                                                                                                                                                                                                                                                                                                                                                                                                                                                                                      |
| <b>Question</b>                             | <b>Response</b>                                                                                                                                                                                                                                                                                                                                                                                                                                                                                                                                                                                                                                                                                                                                                                                                                                                                                                                                                                                                                                                                                                                                                                                                                                                                                                                                                                                                                                                                                                                                                                                                                                                                                                                                                                                                                                                                                                                                                                                                                                                                                                                                                                                                                                                                                                                                                                                                                                                                                                                                                                                                                                                                                                                                                                                                                                                                                                                                                                                                                                                                                                                                                                                                                                                                                                                      |
| <b>Financial Disclosure</b>                 | The author received no specific funding for this work. RM is funded by the Health Data Research UK BREATHE hub who had no role in study design, data collection and analysis, decision to publish, or preparation of the manuscript.                                                                                                                                                                                                                                                                                                                                                                                                                                                                                                                                                                                                                                                                                                                                                                                                                                                                                                                                                                                                                                                                                                                                                                                                                                                                                                                                                                                                                                                                                                                                                                                                                                                                                                                                                                                                                                                                                                                                                                                                                                                                                                                                                                                                                                                                                                                                                                                                                                                                                                                                                                                                                                                                                                                                                                                                                                                                                                                                                                                                                                                                                                 |
| Enter a financial disclosure statement that |                                                                                                                                                                                                                                                                                                                                                                                                                                                                                                                                                                                                                                                                                                                                                                                                                                                                                                                                                                                                                                                                                                                                                                                                                                                                                                                                                                                                                                                                                                                                                                                                                                                                                                                                                                                                                                                                                                                                                                                                                                                                                                                                                                                                                                                                                                                                                                                                                                                                                                                                                                                                                                                                                                                                                                                                                                                                                                                                                                                                                                                                                                                                                                                                                                                                                                                                      |

describes the sources of funding for the work included in this submission. Review the [submission guidelines](#) for detailed requirements. View published research articles from [PLOS Medicine](#) for specific examples.

This statement is required for submission and **will appear in the published article** if the submission is accepted. Please make sure it is accurate.

#### Unfunded studies

Enter: *The author(s) received no specific funding for this work.*

#### Funded studies

Enter a statement with the following details:

- Initials of the authors who received each award
- Grant numbers awarded to each author
- The full name of each funder
- URL of each funder website
- Did the sponsors or funders play any role in the study design, data collection and analysis, decision to publish, or preparation of the manuscript?
- **NO** - Include this sentence at the end of your statement: *The funders had no role in study design, data collection and analysis, decision to publish, or preparation of the manuscript.*
- **YES** - Specify the role(s) played.

\* typeset

#### Competing Interests

Use the instructions below to enter a competing interest statement for this submission. On behalf of all authors, disclose any [competing interests](#) that could be perceived to bias this work—acknowledging all financial support and any other relevant financial or non-financial competing interests.

This statement **will appear in the published article** if the submission is accepted. Please make sure it is

I have read the journal's policy and the authors of this manuscript have the following competing interests: AS is a member of the Scottish Government Chief Medical Officer's COVID-19 Advisory Group. All other authors declare no competing interests.

accurate. View published research articles from [PLOS Medicine](#) for specific examples.

**NO authors have competing interests**

Enter: *The authors have declared that no competing interests exist.*

**Authors with competing interests**

Enter competing interest details beginning with this statement:

*I have read the journal's policy and the authors of this manuscript have the following competing interests: [insert competing interests here]*

\* typeset

This statement is **required** for submission and **will appear in the published article** if the submission is accepted. Please make sure it is accurate and that any funding sources listed in your Funding Information later in the submission form are also declared in your Financial Disclosure statement.

**Ethics Statement**

You must include an Ethics Statement in the Methods section of your manuscript if your study involved:

- Human participants
- Human specimens or tissue
- Vertebrate animals or cephalopods
- Vertebrate embryos or tissues
- Field research

**Not including a statement when required will delay the review process.**

General guidance is provided below.

I confirm that I have read and understood PLOS' requirements for an Ethics Statement.

Please consult the guidelines on human subjects research and animal research for detailed instructions.

#### **Format for specific study types**

##### **Human Subject Research (involving human participants and/or tissue)**

- Give the name of the institutional review board or ethics committee that approved the study
- Include the approval number and/or a statement indicating approval of this research
- Indicate the form of consent obtained (written/oral) or the reason that consent was not obtained (e.g. the data were analyzed anonymously)

##### **Animal Research (involving vertebrate animals, embryos or tissues)**

- Provide the name of the Institutional Animal Care and Use Committee (IACUC) or other relevant ethics board that reviewed the study protocol, and indicate whether they approved this research or granted a formal waiver of ethical approval
- Include an approval number if one was obtained
- If the study involved *non-human primates*, add *additional details* about animal welfare and steps taken to ameliorate suffering

##### **Field Research**

Include the following details if this study involves the collection of plant, animal, or other materials from a natural setting:

- Field permit number
- Name of the institution or relevant body that granted permission

Please check the box to confirm your understanding of this policy, then read and agree to one of the statements.

Please respond:  
as follow-up to "**Ethics Statement**

You must include an Ethics Statement in the Methods section of your manuscript if your study involved:

- Human participants
- Human specimens or tissue
- Vertebrate animals or cephalopods
- Vertebrate embryos or tissues
- Field research

**Not including a statement when required will delay the review process.**

General guidance is provided below.  
Please consult the guidelines on human subjects research and animal research for detailed instructions.

My study does not require an ethics statement.

**Format for specific study types**

**Human Subject Research (involving human participants and/or tissue)**

- Give the name of the institutional review board or ethics committee that approved the study
- Include the approval number and/or a statement indicating approval of this research
- Indicate the form of consent obtained (written/oral) or the reason that consent was not obtained (e.g. the data were analyzed anonymously)

**Animal Research (involving vertebrate animals, embryos or tissues)**

- Provide the name of the Institutional Animal Care and Use Committee (IACUC) or other relevant ethics board that reviewed the study protocol, and indicate whether they approved this research or granted a formal waiver of ethical approval
- Include an approval number if one was obtained
- If the study involved *non-human primates*, add *additional details* about animal welfare and steps taken to ameliorate suffering

**Field Research**

Include the following details if this study involves the collection of plant, animal, or other materials from a natural setting:

- Field permit number
- Name of the institution or relevant body that granted permission

Please check the box to confirm your understanding of this policy, then read and agree to one of the statements. "

**Data Availability**

Authors are required to make all data underlying the findings described fully available, without restriction, and from the time of publication. PLOS allows rare exceptions to address legal and ethical concerns. See the [PLOS Data Policy](#) and

No - some restrictions will apply

[FAQ](#) for detailed information.

A Data Availability Statement describing where the data can be found is required at submission. Your answers to this question constitute the Data Availability Statement and **will be published in the article**, if accepted.

**Important:** Stating 'data available on request from the author' is not sufficient. If your data are only available upon request, select 'No' for the first question and explain your exceptional situation in the text box.

Do the authors confirm that all data underlying the findings described in their manuscript are fully available without restriction?

**Describe where the data may be found in full sentences. If you are copying our sample text, replace any instances of XXX with the appropriate details.**

- If the data are **held or will be held in a public repository**, include URLs, accession numbers or DOIs. If this information will only be available after acceptance, indicate this by ticking the box below. For example: *All XXX files are available from the XXX database (accession number(s) XXX, XXX).*
- If the data are all contained **within the manuscript and/or Supporting Information files**, enter the following: *All relevant data are within the manuscript and its Supporting Information files.*
- If neither of these applies but you are able to provide **details of access elsewhere**, with or without limitations, please do so. For example:

*Data cannot be shared publicly because of [XXX]. Data are available from the XXX Institutional Data Access / Ethics Committee (contact via XXX) for*

All relevant data are within the manuscript and its Supporting Information files and further Scottish data can be accessed via the Public health Scotland wider impacts dashboard <https://scotland.shinyapps.io/phs-covid-wider-impact/>. Aggregated English data could be made available if in agreement with information governance regulations and upon request from the authors. All code used in the analyses will be made publicly available via the EAVE II GitHub page (<https://github.com/EAVE-II>).

*researchers who meet the criteria for access to confidential data.*

*The data underlying the results presented in the study are available from (include the name of the third party and contact information or URL).*

- This text is appropriate if the data are owned by a third party and authors do not have permission to share the data.

\* typeset

Additional data availability information:



1 **Full Title**

2 Uptake of infant and pre-school immunisations in Scotland and England during the COVID-  
3 19 pandemic: an observational study of routinely collected data

4 **Short Title**

5 Uptake of routine childhood immunisation during the COVID-19 pandemic

6 **Authors**

7 Fiona McQuaid<sup>1\*</sup>, Rachel Mulholland<sup>2</sup>, Yuma Sangpang Rai<sup>3</sup>, Utkarsh Agrawal<sup>4</sup>, Helen  
8 Bedford<sup>5</sup>, J. Claire Cameron<sup>6</sup>, Cheryl Gibbons<sup>6</sup>, Partho Roy<sup>3</sup>, Aziz Sheikh<sup>2</sup>, Ting Shi<sup>2</sup>, Colin  
9 R Simpson<sup>2,7</sup>, Judith Tait<sup>6</sup>, Elise Tessier<sup>3</sup>, Steve Turner<sup>8</sup>, Jaime Villacampa Ortega<sup>6</sup>, Joanne  
10 White<sup>3</sup>, Rachael Wood<sup>2,6</sup>

11 <sup>1</sup>Department of Child Life and Health, University of Edinburgh, Edinburgh, UK

12 <sup>2</sup>Usher Institute, University of Edinburgh, Edinburgh, UK

13 <sup>3</sup>Immunisation and Countermeasures Division, National Infections Service, Public Health  
14 England, London, UK

15 <sup>4</sup>School of Medicine, University of St Andrews, St Andrews, UK

16 <sup>5</sup>UCL Great Ormond Street Institute of Child Health, London, UK

17 <sup>6</sup>Public Health Scotland, Glasgow and Edinburgh, UK

18 <sup>7</sup>School of Health, Wellington Faculty of Health, Wellington, NZ

19 <sup>8</sup>Women and Children Division, NHS Grampian, Aberdeen, UK

20 **\*Corresponding author:**

21 Email: [Fiona.mcquaid@ed.ac.uk](mailto:Fiona.mcquaid@ed.ac.uk) (FM)

22 **Contributor information**

23 The study was conceived and designed by FM, RW and RM. The data were analysed by FM,  
24 RM, YR with oversight from RW and ET. FM drafted the manuscript. JT and JVO were  
25 responsible for the Public Health Scotland wider impacts of COVID-19 database from which  
26 the Scottish data were extracted. All authors have reviewed the statistical analysis plan and  
27 approved the manuscript.

28 **Competing interests**

29 All authors have completed the ICMJE uniform disclosure form at  
30 [www.icmje.org/coi\\_disclosure.pdf](http://www.icmje.org/coi_disclosure.pdf) . AS is a member of the Scottish Government Chief  
31 Medical Officer’s COVID-19 Advisory Group. RM is funded by the Health Data Research  
32 UK BREATHE hub. All other authors declare no competing interests

33 **Data sharing statement**

34 All data used in this study are publicly available on the Public Health Scotland “Wider  
35 impacts of COVID-19” dashboard which can be accessed via  
36 <https://scotland.shinyapps.io/phs-covid-wider-impact/>. The code used to analyse the data is  
37 publicly available via the EAVE II GitHub (<https://github.com/EAVE-II>).

38 **Abstract**

39 **Background**

40 In 2020, the COVID-19 pandemic and control measures such as national lockdowns  
41 threatened to disrupt routine childhood immunisation programmes. Initial reports from the  
42 early weeks of lockdown in the UK and worldwide suggested that immunisation uptake  
43 would fall, putting children at risk from multiple other infectious diseases. In Scotland and  
44 England, enhanced surveillance of national data for childhood immunisations was established  
45 to inform and rapidly assess the impact of the pandemic on infant and preschool  
46 immunisation uptake rates.

47 **Methods and findings**

48 We undertook an observational study using routinely collected data for the year prior to the  
49 pandemic (2019), and immediately before, during and after the first period of the UK  
50 ‘lockdown’ in 2020. Data were obtained for Scotland from the Public Health Scotland  
51 “COVID19 wider impacts on the health care system” dashboard

52 (<https://scotland.shinyapps.io/phs-covid-wider-impact/>) and for England from ImmForm.

53 Five vaccinations delivered at different ages were evaluated; three doses of the ‘6-in-1’  
54 DTaP/IPV/Hib/HepB vaccine and two doses of MMR. Uptake in the periods in 2020  
55 compared to that in the baseline year of 2019 using binary logistic regression analysis. For  
56 Scotland, we analysed timely uptake of immunisations, defined as uptake within four weeks  
57 of the child becoming eligible by age for each immunisation and data were also analysed by  
58 geographical region and indices of deprivation. For both Scotland and England, we assessed  
59 whether immunisations were up to date at approximately 6 months (all doses 6-in-1) and 16-  
60 18 months (first MMR) of age.

61 We found that uptake rates within four weeks of eligibility in Scotland for all the five vaccine  
62 visits were higher during the 2020 lockdown period than in 2019. The difference ranged from  
63 1.3% for the first dose of the 6-in-1 vaccine (95.3 vs 94%, OR 1.28, CI 1.18-1.39) to 14.3%  
64 for the second MMR dose (66.1 vs 51.8 %, OR 1.8, CI 1.74-1.87). Significant increases in  
65 uptake were seen across all deprivation levels, though, for MMR, there was evidence of  
66 greater improvement for children living in the least deprived areas.

67 In England, fewer children who had been due to receive their immunisations during the  
68 lockdown period were up to date at 6 months (6-in-1) or 18 months (first dose MMR). The  
69 fall in percentage uptake ranged from 0.5% for first 6-in-1 (95.8 vs 96.3%, OR 0.89, CI 0.86-  
70 0.91) to 2.1% for third 6-in-1 (86.6 vs 88.7%, OR 0.82, CI 0.81-0.83).

## 71 **Conclusions**

72 This study suggests that the national lockdown in Scotland was associated with a positive  
73 effect on timely childhood immunisation uptake, however in England a lower percentage of  
74 children were up to date at 6 and 18 months. Reason for the improve uptake in Scotland may  
75 include active measures taken to promote immunisation at local and national level  during this  
76 period. Promoting immunisation uptake and addressing potential vaccine hesitancy is  
77 particularly important given the ongoing pandemic and COVID-19 vaccination campaigns.

78 **Introduction**

79 The COVID-19 pandemic and associated control measures such as national ‘lockdowns’,  
80 involving varying restrictions on leaving the home, work and socialising, have had a  
81 profound impact on daily life and the delivery of healthcare worldwide. In the UK, a national  
82 lockdown was announced on the 23<sup>rd</sup> March 2020 with instructions that people should only  
83 leave their home for a limited number of “essential” reasons. (1) This was accompanied by  
84 the reconfiguration of acute healthcare services to support the anticipated influx of COVID-  
85 19 patients, cancellation of most elective activity and pausing of screening programmes. (2)  
86 During lockdown, there was evidence of a change in healthcare-seeking behaviour – for  
87 example, in Scotland the uptake of both emergency and elective hospital based care dropped  
88 substantially over the lockdown period. (3) However, within child health, key routine  
89 services including childhood immunisations continued through the UK. (4)

90 It has become increasingly apparent that younger children are at low risk of severe disease  
91 due to Severe acute respiratory syndrome coronavirus 2 (SARS-CoV-2) (5) and may be less  
92 susceptible to infection with the virus. (6) Yet the wider impact of the pandemic on children  
93 in terms of education, mental and physical health and safeguarding is not yet fully understood  
94 and is likely to be profound. (7, 8) One particular area of concern early in the lockdown  
95 period was the potential effect on the uptake of routine childhood immunisations. (9)  
96 Maintaining high population vaccine coverage is vital for both direct and indirect (via herd  
97 immunity) protection against non-COVID-19 infectious diseases.

98 In July 2020, the World Health Organization (WHO) warned of a potential decline in routine  
99 immunisation rates associated with the COVID-19 pandemic, citing a poll from May 2020 in  
100 which respondents from 82 countries suggested disruption to immunisation programmes was  
101 widespread (10). Initial reports from England, (11) Pakistan (12) South Africa, (13)

102 Singapore (14) and the USA, (15) were concerning, suggesting a fall in children receiving  
103 their scheduled vaccinations in the very early weeks of national lockdowns, though the full  
104 impact has not yet been assessed. However, the English and US studies relied on surrogate  
105 measures of vaccine uptake; number of vaccines delivered/ordered (without a corresponding  
106 denominator) (11, 15) and the Singaporean study used convenience sampling with multiple  
107 assumptions for missing data (14). Longer-term data were available from the KwaZulu-Natal  
108 province of South Africa (13) and Sindh province of Pakistan (12), which appeared to show  
109 some recovery after an initial fall in uptake; however, in Pakistan, part of the lockdown  
110 restrictions involved shutting down of outreach immunisation programme. The overall impact  
111 of lockdown on immunisation uptake in higher income countries which maintained their  
112 routine immunisation programmes is unclear.

113 Given the prolonged, and repeated periods of lockdown, it is important to evaluate the overall  
114 effect on childhood immunisation uptake. The aim of this study was therefore to provide a  
115 longer perspective than previous studies by describing the pattern of childhood immunisation  
116 uptake in Scotland and England before, during and immediately after the first national  
117 lockdown implemented in response to the pandemic (23<sup>rd</sup> March-31st July), with  
118 comparisons to baseline data from 2019, by geographical area and socio-economic  
119 deprivation.

120 **Methods**

121 *Study design*

122 This observational study took advantage of the natural experiment afforded by the COVID-19  
123 pandemic and used routinely collected data for the year prior to the pandemic (2019) and  
124 immediately before, during and after the first period of ‘lockdown’ imposed by the United  
125 Kingdom and Scottish governments in 2020. Data were available for Scotland and England,  
126 however, as discussed below, variations in time points at which the data were collected  
127 precluded direct comparisons. Of note, this analysis relates to the first national lockdown  
128 which began on 23<sup>rd</sup> March 2020 with restrictions easing gradually from over June and July  
129 2020.

130 The vaccines chosen as indicators of preschool immunisation uptake were the hexavalent  
131 DTaP/IPV/Hib/HepB vaccine, (referred to here as ‘6in1’), which protects against Diphtheria,  
132 Tetanus, Pertussis, Polio, *Haemophilus influenzae* type b and Hepatitis B, and the Measles,  
133 Mumps and Rubella vaccine (referred to as ‘MMR’). In the UK, the 6in1 vaccine is  
134 recommended at age eight (‘first dose 6in1’), 12 (‘second dose 6in1’) and 16 (‘third dose  
135 6in1’) weeks of age, and MMR is given at 12 months (‘first dose MMR’) and 3 years 4  
136 months (‘second dose MMR’) (16). Uptake of the additional immunisations offered at the  
137 same ages (Meningococcal C, Rotavirus and Pneumococcal) was not directly measured.

138 For Scotland, we chose to primarily examine uptake within four weeks of eligibility as this  
139 represents timely uptake of vaccinations as per the recommended UK schedule (16) leading  
140 to the child being protected at the earliest recommended opportunity. All children living in  
141 Scotland who became eligible by age for any of the pre-school immunisations of interest  
142 from January 2019 up to and including the week beginning 28<sup>th</sup> September 2020 were  
143 included. Of secondary interest, and to allow descriptive comparisons with data from

144 England, we also analysed uptake at approximately 6 months (range 24-32 weeks) for the  
145 6in1 and 16 months for the first dose MMR. For England, equivalent data on uptake within  
146 four weeks were not available therefore the analysis was conducted on uptake by six (6in1) or  
147 18 months of age (first MMR) and monthly, rather than weekly, data were used.

148 Vaccine uptake was analysed in the following four time periods: 1<sup>st</sup> January to 31<sup>st</sup>  
149 December 2019 (“2019”), 1st January to week beginning 16th March 2020 (“pre-lockdown”),  
150 23rd March to week beginning 27<sup>th</sup> July (“lockdown”) and week beginning 3<sup>rd</sup> August to  
151 week beginning 28<sup>th</sup> September 2020 inclusive (“post-lockdown”). These time periods were  
152 chosen to correspond with the beginning of the first UK-wide lockdown as announced by the  
153 UK government on the 23rd March 2020 (1). The end of the lockdown period is less well-  
154 defined and varied both in approach and timescale between Scotland and England (17, 18).  
155 Broadly speaking, by the end of July 2020, there was a substantial reduction in ‘lockdown’  
156 restrictions in both countries with the opening of many non-essential businesses and limited  
157 indoor meeting between households permitted, therefore a pragmatic approach was taken to  
158 define the lockdown period as 23rd March 2020 until 31st July 2020. Children were included  
159 in the time period at which they first became eligible by age. As data from England were  
160 available by month only, the pre-lockdown period included January to end of March 2020.

#### 161 *Data sources*

162 The Scottish data used in this paper were extracted in January 2021 from the PHS “COVID19  
163 wider impacts on the health care system” dashboard, which is publicly accessible at  
164 <https://scotland.shinyapps.io/phs-covid-wider-impact/>. The dashboard includes aggregate  
165 information on immunisation uptake, including by the geographical area in which the child is  
166 living and the corresponding Scottish Index of Multiple Deprivation (SIMD) (both assigned  
167 based on the child’s postcode registered on the Scottish national vaccination call-recall



168 system, SIRS). The SIMD breaks Scotland into 6976 small areas of similar population size  
169 and assigns one of five SIMD quintile based on indicators of deprivation including income,  
170 education and housing, with 1 representing the most deprived areas and 5, the least. (19) We  
171 defined geographical areas by the Health and Social Care Partnership (HSCP) in which the  
172 child lives. Within Scotland there are 31 HSCPs which provide integrated health and social  
173 care to their population.

174 English data were extracted from the ImmForm system, for January 2019 (representing the  
175 first extract for pre-lockdown period) to September 2020 (representing the final extract for  
176 post-lockdown period), which automatically receives monthly aggregate data on vaccine  
177 uptake from 92-95% of English GP practices, provided by GP System Suppliers. These data  
178 are validated and analysed by Public Health England to check completeness, query any  
179 anomalous results, and are used to describe epidemiological trends, as well as being used  
180 directly locally by the NHS for performance management. Data were available for  
181 immunisation uptake at age six months (each dose of the 6in1 immunisation) and 18 months  
182 (first MMR) only.

### 183 *Statistical methods*

184 The primary outcome examined was the change in percentage uptake, within four weeks of  
185 eligibility, of each of the immunisations of interest between baseline uptake rates in 2019 and  
186 during the lockdown period for Scotland as a whole and by geographical areas or level of  
187 deprivation. Of secondary interest were comparisons between 2019 and the other time points  
188 listed above. Broadly comparable analyses were conducted to examine the primary outcome  
189 for England as a whole. Due to differences in data collection methods and age of child at  
190 data extraction point, comparisons between Scottish and English data were descriptive only.  
191 The prespecified analysis plan is included within the supplementary materials.

192 To compare uptake rates between time periods, aggregate binary logistic regression  
193 modelling was conducted, using vaccination status (vaccinated vs unvaccinated) as the  
194 dependent variable, and time period as the explanatory variable.. Separate analyses were  
195 carried out for each vaccine and country. When comparing HSCP or deprivation, an  
196 additional interaction with HSPC or SIMD quintile was included in the model. Odds ratios  
197 with 95% confidence intervals were calculated for uptake in the period of interest compared  
198 to the 2019 baseline. Given the nature of the aggregated data available, no adjusting for  
199 potential confounders or effect modifiers was possible.

200 All analyses and generation of figures were performed using R/R Studio (4.0.3). All code is  
201 publicly available via the EAVE II GitHub page (<https://github.com/EAVE-II>) and data can  
202 be accessed via the PHS wider impacts dashboard [https://scotland.shinyapps.io/phs-covid-  
203 wider-impact/](https://scotland.shinyapps.io/phs-covid-wider-impact/). Aggregated English data could be made available if in agreement with  
204 information governance regulations and upon request from the authors. Further  
205 methodological details can be found in supplemental data.

### 206 *Ethics and funding*

207 Ethical approval for this specific study was not required as we have used publicly available,  
208 anonymised, aggregated data. Results have been reported using the STROBE (20) and  
209 RECORD (21) guidelines. No specific funding was received for this project, RM is funded by  
210 the Health Data Research UK BREATHE hub. ImmForm data are not publicly available,  
211 however, an agreement was accepted for England to only share the national figures and  
212 analyses outputs.

213 **Results**

214 *Preschool immunisation uptake increased during the lockdown period in Scotland*

215 Across Scotland, the percentage of preschool children receiving their immunisations within  
216 four weeks of becoming eligible increased during the lockdown period for all five  
217 immunisations (Fig1, Table 1, Table S1). The change in percentage uptake compared to the  
218 2019 baseline ranged from 1.3% for the first dose 6in1 (OR 1.28, CI 1.18-1.39) to 14.3% or  
219 the second dose MMR (OR 1.8, CI 1.74-1.87) (Table 1). Across all the immunisations visits,  
220 this equated to an additional 7,508 infants/preschool children receiving their immunisations  
221 in a timely manner over the lockdown period compared to the baseline rates of 2019. Uptake  
222 rates dipped immediately before the announcement of a national lockdown in mid-March  
223 2020 (Fig1), then peaked throughout June before starting to decrease. However, uptake  
224 remained significantly higher than 2019 during the post lockdown period (Fig 1, Table 1). Of  
225 note, prior to lockdown for both MMR doses, there was already a modest, increase in uptake  
226 compared to 2019 (Table 1).

**A** 6in1 vaccine

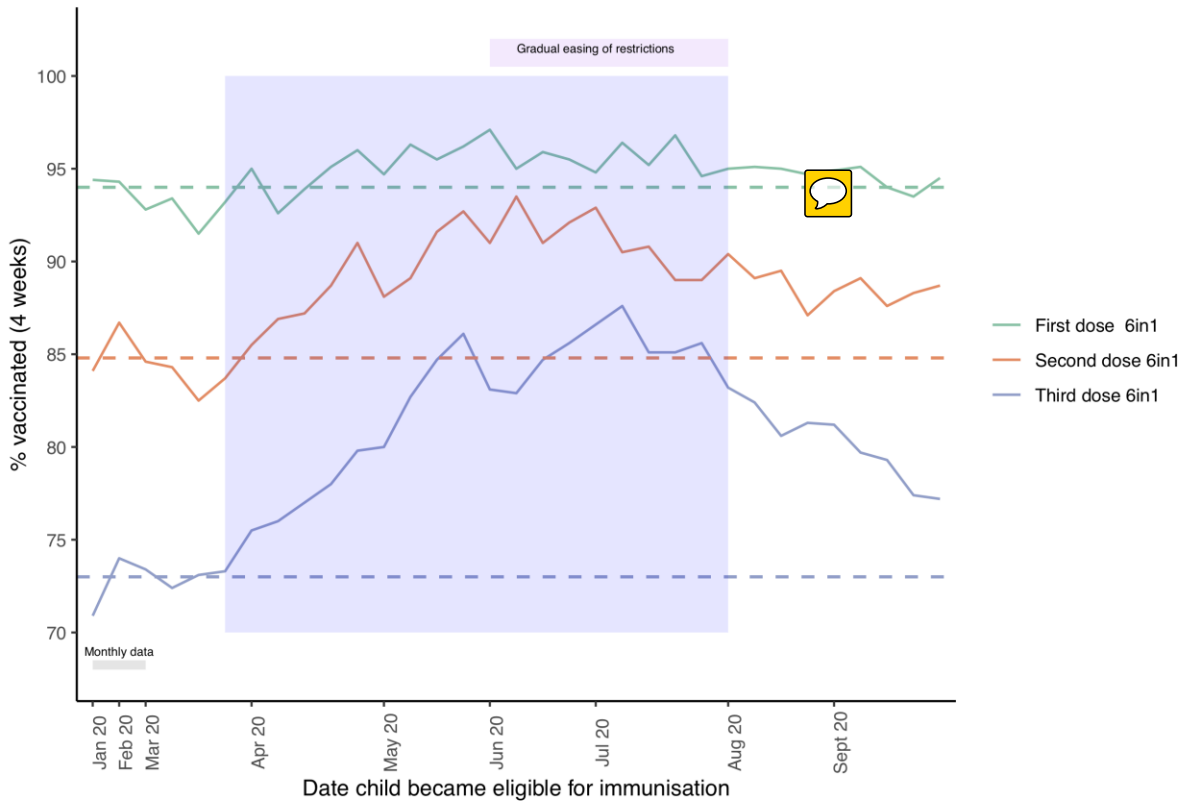

**B** MMR vaccine

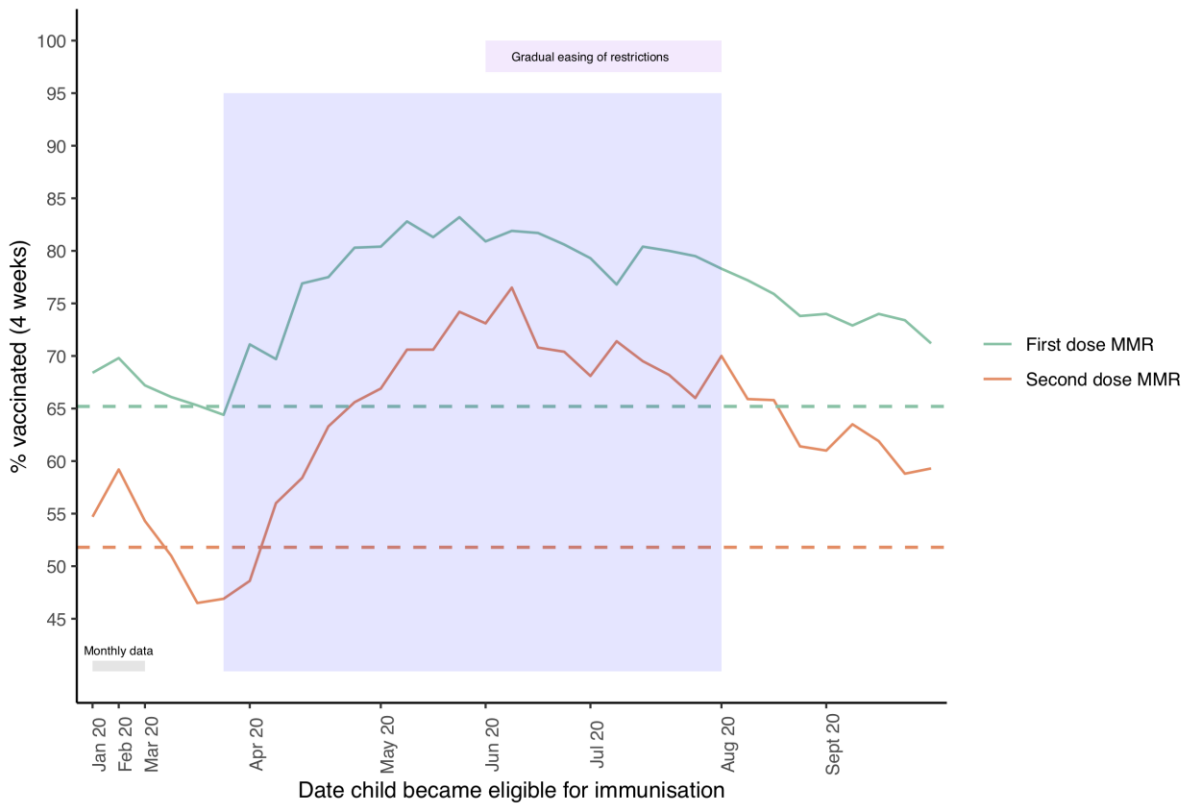

227

228 **Fig 1: Percentage of children in Scotland immunised within 4 weeks of eligibility**

229 (A) all doses 6in1 vaccine, (B) MMR vaccine across January to September 2020. Lockdown  
230 period = blue shaded area. For January and February, a single mean monthly value is plotted  
231 and from March onwards, weekly uptake is shown (see table S1 for full data). Dashed  
232 horizontal lines indicated the mean uptake in 2019 of the immunisation with the  
233 corresponding colour. The increase in uptake during the lockdown period was statistically  
234 significant (see Table 1 for details).

235 Table 1: Uptake of pre-school immunisations by time-period with odds ratio compared to baseline of 2019.

| <b>Immunisation</b> | <b>Time period</b> | <b>% uptake within 4 weeks of eligibility<br/>(no. received/total eligible)</b> | <b>% point change from 2019</b> | <b>OR for uptake compared to 2019<br/>(95%CI)</b> | <b>p-value</b> |
|---------------------|--------------------|---------------------------------------------------------------------------------|---------------------------------|---------------------------------------------------|----------------|
| First in 1          | 2019               | 94<br>(47567/50609)                                                             | NA                              | NA                                                | NA             |
|                     | Pre LD             | 93.3<br>(10103/10761)                                                           | -0.7                            | 0.98 (0.9-1.07)                                   | 0.68           |
|                     | LD                 | 95.3<br>(16371/17133)                                                           | 1.3                             | 1.28 (1.18-1.39)                                  | <0.001         |
|                     | Post LD            | 94.6<br>(8075/8531)                                                             | 0.6                             | 1.13 (1.02-1.25)                                  | 0.02           |
| Second in 1         | 2019               | 84.8<br>(43221/50975)                                                           | 0                               | NA                                                | NA             |
|                     | Pre LD             | 84.4                                                                            | -0.4                            | 1.03 (0.97-1.09)                                  | 0.39           |

|           |         |                       |      |                  |        |
|-----------|---------|-----------------------|------|------------------|--------|
|           |         | (9106/10698)          |      |                  |        |
|           | LD      | 89.7<br>(15443/17222) | 4.9  | 1.56 (1.47-1.65) | <0.001 |
|           | Post LD | 88.7<br>(7459/8412)   | 3.9  | 1.4 (1.31-1.51)  | <0.001 |
| Third6in1 | 2019    | 73<br>(37266/51083)   | NA   | NA               | NA     |
|           | Pre LD  | 72.8<br>(8276/11394)  | -0.2 | 0.98 (0.94-1.03) | 0.49   |
|           | LD      | 82.1<br>(14039/17093) | 9.1  | 1.7 (1.63-1.78)  | <0.001 |
|           | Post LD | 80.3<br>(6555/8172)   | 7.3  | 1.5 (1.42-1.59)  | <0.001 |
| FirstMMR  | 2019    | 65.2<br>(33935/52015) | NA   | NA               | NA     |
|           | Pre LD  | 67.4                  | 2.2  | 1.16 (1.11-1.21) | <0.001 |

|           |         |                       |      |                  |        |
|-----------|---------|-----------------------|------|------------------|--------|
|           |         | (7782/11370)          |      |                  |        |
|           | LD      | 78.4<br>(14482/18463) | 13.2 | 1.94 (1.86-2.02) | <0.001 |
|           | Post LD | 74.5<br>(6740/9047)   | 9.3  | 1.56 (1.48-1.64) | <0.001 |
| SecondMMR | 2019    | 51.8<br>(25844/49940) | NA   | NA               | NA     |
|           | Pre LD  | 53.1<br>(6390/11495)  | 1.3  | 1.17 (1.12-1.22) | <0.001 |
|           | LD      | 66.1<br>(11303/17145) | 14.3 | 1.8 (1.74-1.87)  | <0.001 |
|           | Post LD | 63.1<br>(5171/8196)   | 11.3 | 1.59 (1.52-1.67) | <0.001 |

236 LD = lockdown, NA = not applicable, statistically significant changes in uptake compared to 2019 are shaded green. *p*-value rounded to 2

237 decimal places.B



238 *Variation in uptake of preschool immunisations by geographical area*

239 Baseline data from 2019 showed the percentage uptake of preschool immunisations within  
240 four weeks of eligibility varied widely by geographical HSCP and immunisation (Fig2,  
241 FigS1, Table S2). In keeping with the rise in mean uptake across Scotland for all vaccines,  
242 the percentage of children immunised in most HSCP increased between 2019 and lockdown.  
243 However, not all followed this pattern with a minority demonstrating a fall in uptake (Fig2,  
244 FigS1&2, Table S2). Care must be taken when interpreting percentage results from the island  
245 HSCPs (Shetland Islands, Orkney Islands and Western Isles) given the very small numbers of  
246 children involved (Table S2).

247

First 6in1 2019

% immunised within 4 wks

- 90 to 92
- 92 to 94
- 94 to 96
- 96 to 98

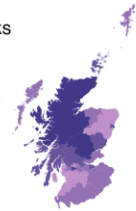

First 6in1 % change from 2019 (stat sig)

% point change LD vs 2019

- 2 to -1
- 1 to 0
- 0 to 1
- 1 to 2
- 2 to 3
- 3 to 4
- Missing

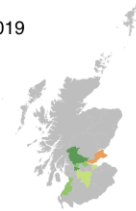

Second 6in1 2019

% immunised within 4 wks

- 78 to 80
- 80 to 82
- 82 to 84
- 84 to 86
- 86 to 88
- 88 to 90
- 90 to 92
- 92 to 94

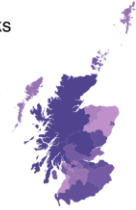

Second 6in1 % change from 2019 (stat sig)

Absolute % change LD vs 2019

- 10 to -5
- 5 to 0
- 0 to 5
- 5 to 10
- Missing

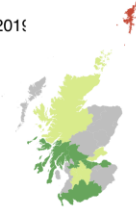

Third 6in1 2019

% immunised within 4 wks

- 65 to 70
- 70 to 75
- 75 to 80
- 80 to 85
- 85 to 90

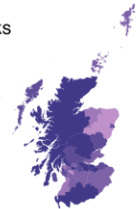

Third 6in1 % change from 2019 (stat sig)

Absolute % change LD vs 2019

- 15 to -10
- 10 to -5
- 5 to 0
- 0 to 5
- 5 to 10
- 10 to 15
- 15 to 20
- Missing

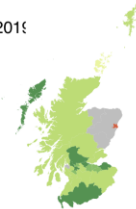

249

First MMR 2019

% immunised within 4 wks

- 20 to 30
- 30 to 40
- 40 to 50
- 50 to 60
- 60 to 70
- 70 to 80

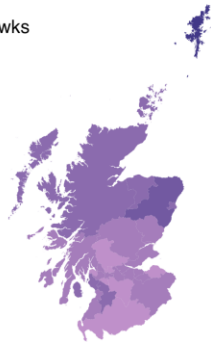

First MMR % change from 2019 (stat sig)

% point change LD vs 2019

- 0 to 5
- 5 to 10
- 10 to 15
- 15 to 20
- 20 to 25
- 25 to 30
- 30 to 35

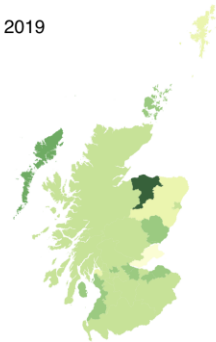

Second MMR 2019

% immunised within 4 wks

- 20 to 30
- 30 to 40
- 40 to 50
- 50 to 60
- 60 to 70
- Missing

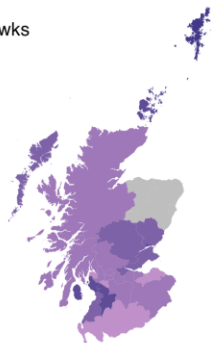

Second MMR % change from 2019 (stat sig)

% point change LD vs 2019

- 10 to 0
- 0 to 10
- 10 to 20
- 20 to 30
- 30 to 40
- Missing

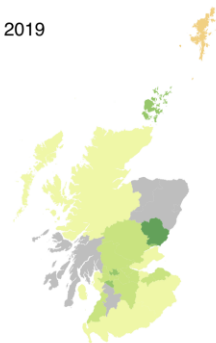

251

252 Fig 2: Choropleth maps showing baseline mean percentage uptake by HSCP

253 Left hand side = 2019, Right hand side = percentage point difference between 2019 and  
254 lockdown for areas in which the difference was statistically significant. Grey = no statistically  
255 significant changes in uptake between 2019 and lockdown, with the exception of ampian  
256 HSCP for MMR dose 2 (see text).

257 For individual HSCP, the statistical significance of the change in uptake varied by  
258 immunisation (Fig 2 and Table S2). Despite a general trend of improvement for the first 6in1  
259 vaccine, we found a significant change for only eight of the 31 HSCP, mainly centred around  
260 the more densely populated, urban central belt of Scotland (Glasgow City, Edinburgh,  
261 Stirling and Clackmannanshire, East Dunbartonshire, Falkirk, Fife, South Lanarkshire, South  
262 Ayrshire, Fig2). However, this pattern evolved with the different immunisation visits and  
263 with almost all HSCP showing a rise in uptake for both MMR immunisations, with  
264 percentage point increases as high as 30% (Angus, 74.1% vs 43.8%, OR 3.38 ,CI 2.61-4.37)  
265 (Fig 2, table S2).

266 *Preschool immunisation uptake increased across all deprivation levels*

267 Percentage uptake within four weeks of becoming eligible rose across all SIMD quintiles,  
268 between 2019 and lockdown, for all immunisations (Fig3). The magnitude of this rise varied  
269 by quintile and vaccine (Fig S3, Table S3) from 0.3% (SIMD 4, first 6in1 dose, OR 1.1, 95%  
270 CI 0.9-1.3) to 16.2% (SIMD 5, second MMR dose, OR 2.1, 95% CI 1.9-2.3). The increase in  
271 uptake between 2019 and lockdown was statistically significant for all except first dose 6in1  
272 for the least deprived quintiles (4 and 5) (Table S3). In the post-lockdown period, percentage  
273 uptake remained significantly higher than the 2019 baseline for all quintiles for each vaccine  
274 except for the first 6in1 dose, in which only the most deprived quintile retained a significant  
275 increase (Fig S3, Table S3).

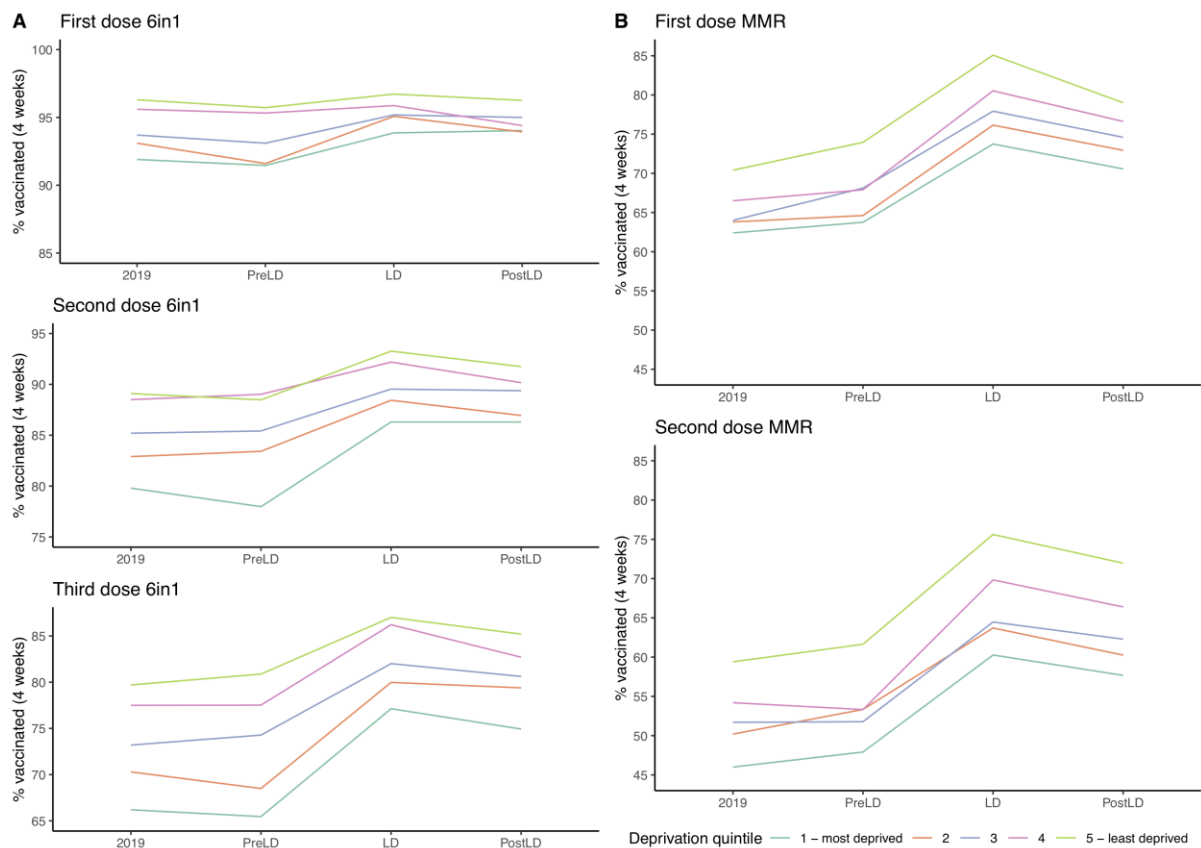

276

277 **Fig 3: Mean percentage immunised by SIMD quintile.** A= 6in1 vaccine, B= MMR

278 vaccine. See Figure S3 and Table S3 for absolute percentage rise compared to 2019 and  
 279 significance levels.

280 In keeping with previous observations (22), children in the least deprived quintiles were more  
 281 likely to be immunised and this relationship was broadly maintained throughout the study  
 282 period (Fig3 & FigS4). While all quintiles improved uptake between 2019 and lockdown,  
 283 whether the inequality between most and least deprived increased or decreased varied by  
 284 vaccine type. For all doses of the 6in1 vaccine there was a tendency to a convergent  
 285 improvement i.e., the gap in percentage uptake between the quintiles lessened, while for both  
 286 MMR doses there was further divergence in uptake rates between most and least deprived  
 287 (Fig 3, Fig S4, Table S4). The interaction of SIMD quintile and time period was non-  
 288 significant for all 6in1 doses; that is to say all SIMD quintiles improved equally for this  
 289 immunisation (Table S4). However, for the first MMR dose, the improvement in uptake was

290 statistically greater for SIMD quintiles 3-5 compared to SIMD 1, and for the second MMR  
291 dose, SIMD 5 showed a significantly larger increase in uptake between 2019 and lockdown  
292 (Table S4). This suggests that for the MMR immunisation, the factors leading to an  
293 improvement in uptake had greater positive impact for children living in less deprived areas.

#### 294 *'Catch up' immunisation rates and comparison with data from England*

295 Thus far, the Scottish data presented has related to children receiving their immunisations as  
296 per the recommended schedule (within four weeks of the child becoming eligible by age).  
297 representing a 'gold standard' in which the child is protected as early as possible. It is  
298 recognised that some children will receive their immunisations after this point. This 'catch-  
299 up' effect can be seen in uptakes rate for all Scottish children by the time they reached  
300 between six and eight months (6in1), 16 months (first MMR) or three years eight months  
301 (second MMR) (Fig 4A). Those becoming eligible during lockdown showed minimal change  
302 in this longer-term measure of uptake for the three doses of the 6in1 immunisation, a small  
303 increase in uptake of the first MMR, and a more substantial increase in uptake of the second  
304 MMR (Table S5). These data suggest that while lockdown was associated with a beneficial  
305 effect on timely uptake of all infant and pre-school immunisations, the impact on longer term  
306 or final achieved uptake was more variable, possibly reflecting a ceiling effect on maximal  
307 uptake, for the earliest immunisations.

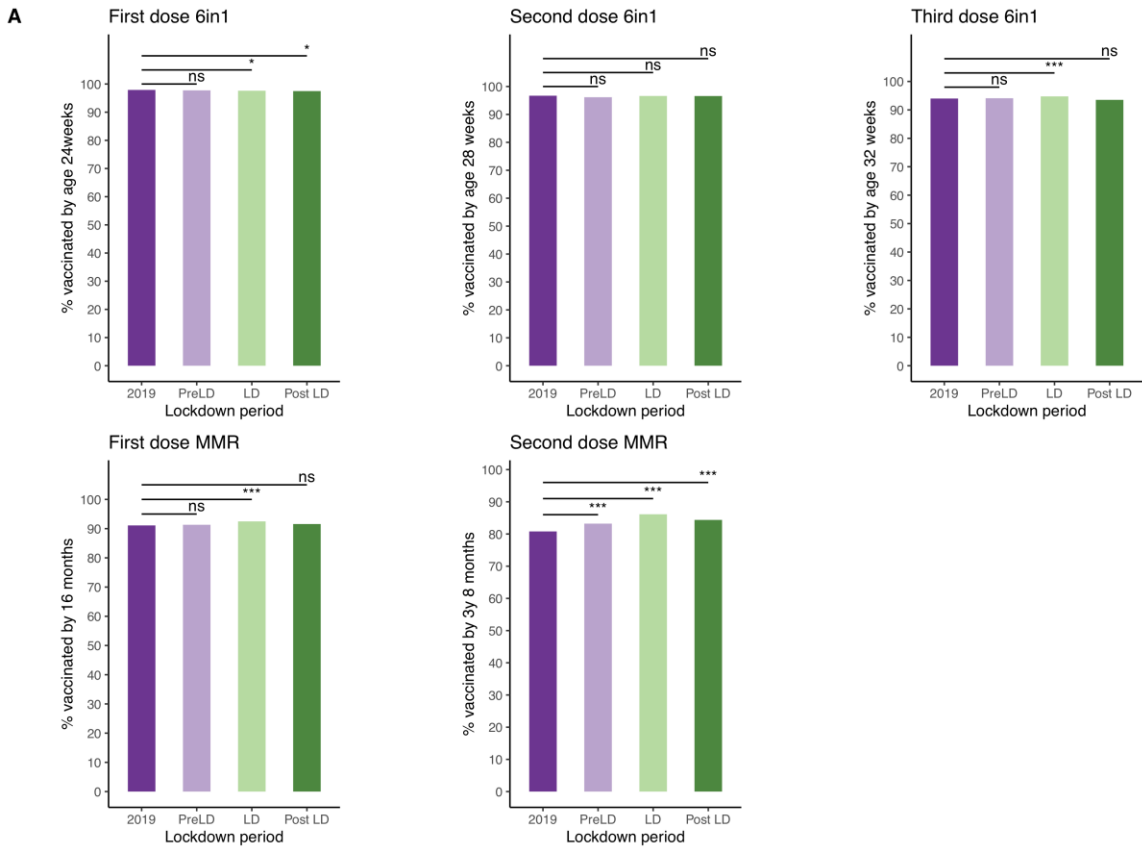

308

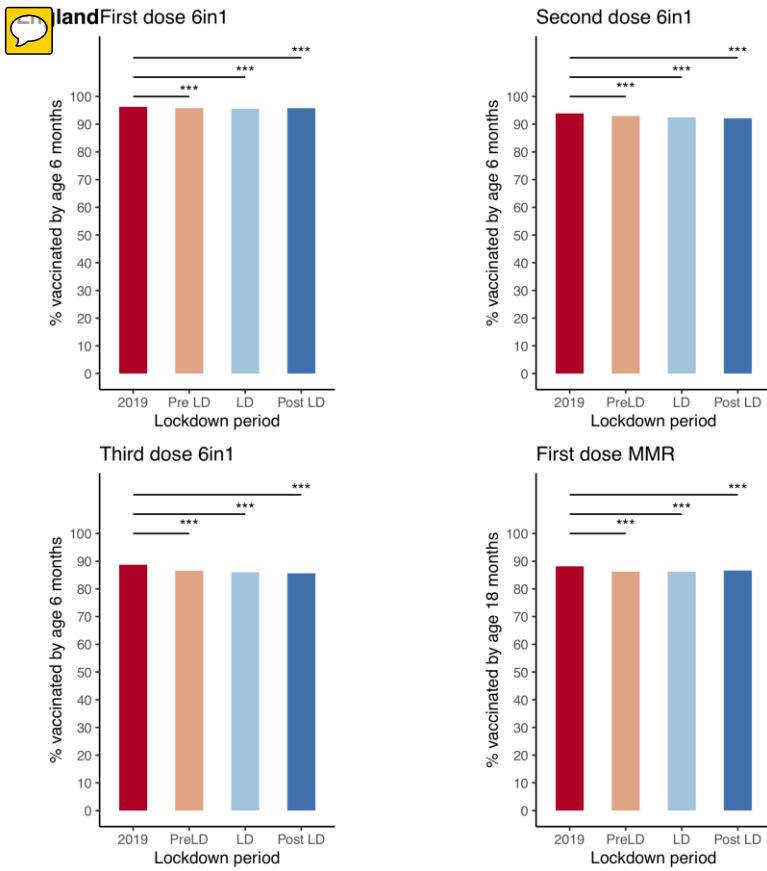

309

310 **Fig 4: Percentage of children up to date at 6/18months.**

311 Overall mean percentage of children immunised by approximately 6 months of age (all doses  
312 of 6 in1, see y-axis for specific ages) or 16-18 months (first MMR) for Scotland and England.  
313 Each bar contains children who became eligible for the immunisation of interest during the  
314 time period indicated. A= Scotland, B = England \*\*\*  $p$ -value < 0.001, \*  $p$ -value <0.05, ns =  
315 not significant



316 For England, broadly equivalent data were available for children aged six months (all doses  
317 6in1) and 18 months (first dose MMR) who had become eligible for their immunisations  
318 during the time periods of interest (Fig 4B, Table S6). These data demonstrated a small, but  
319 statistically significant fall in uptake for all the immunisations in the lockdown periods  
320 compared to 2019, ranging from 0.5% (first dose 6in1, 95.8% vs 96.3%, OR 0.89, CI 0.86-  
321 0.91) to 2.1% (third dose 6in1, 86.6% vs 88.7, OR 0.82, CI 0.81-0.83) (Table S6). However,  
322 much of the fall in uptake took place in the pre-lockdown period, particularly for the third  
323 dose 6in1, with a gradual recovery seen over the lockdown period itself (Fig S5). A general  
324 trend towards falling MMR uptake can also be seen to pre-date the COVID-19 pandemic (Fig  
325 S5).

## 326 **Discussion**

327 Contrary to initial reports which focused only on the very early weeks of national lockdowns  
328 implemented in response to the COVID-19 pandemic, we found that early uptake of infant  
329 and preschool immunisations (within four weeks of a child becoming eligible) rose  
330 significantly for the duration of the first lockdown period in Scotland, resulting in thousands  
331 more children receiving their immunisations at the scheduled time. This is an important  
332 message to send to support public and professional confidence in the preschool immunisation  
333 programme and will help normalise timely immunisation uptake for both parents and health  
334 services. Improving public and professional confidence is particularly vital given in the  
335 current climate of promoting vaccination against SARS-CoV-2. Encouragingly, positive  
336 results were seen across all levels of deprivation, though some geographical variations were  
337 observed across Scotland. Improvement was also seen in longer term uptake of the first and  
338 second MMR immunisations (immunisation within four months of becoming eligible) in the  
339 lockdown period. Findings in England differed, with a small fall in longer term uptake of  
340 immunisations observed for the lockdown period.

### 341 *Strengths and limitations*

342 It is important to acknowledge the limitations of the data presented, many of which arise from  
343 opportunistically using routinely collected data rather than that obtained from a specific study  
344 design. The SIRS electronic system is well-established and captures data on the entire child  
345 population in Scotland. However, the aggregate surveillance data derived from the system  
346 that we could access lacked detailed information on several potentially important factors, not  
347 least of which was ethnicity, which is known to affect both immunisation uptake and attitudes  
348 towards immunisation. (23) In the 2011 Scottish Census, 92% of the population of Scotland  
349 identified themselves as White Scottish/British, and only 4% as non-white, whereas in

350 England, 81% described themselves as White British and 14% non-white. (24) It may not be  
351 appropriate to extrapolate these data to countries with a significantly different ethnic make-up  
352 and it is plausible that some of the difference seen between the Scottish and English data  
353 could be due to these factors.

354 In using the mean percentage of the entire year 2019 as our baseline comparator, we  
355 potentially run the risk of confusing normal seasonal variation in immunisation uptake with  
356 the impact of lockdown measures. Ideally, direct weekly or monthly comparisons would be  
357 made between 2019 and 2020, however quarterly trends published for previous years  
358 including 2019 do not show major difference in uptake throughout the year and in fact show a  
359 gradual decline in uptake year on year since 2015. (25) In addition, it is possible that 2020  
360 uptake rates have been underestimated, due to a lag in data entry into SIRS which would  
361 particularly effect the ‘catch-up’ rates (Fig4A).

362 Therefore, caution must be taken not to over-interpret the results presented here or  
363 extrapolate to significant different populations with varying baseline immunisation uptakes  
364 rates and less robust immunisation programmes, the organisation of which may have been  
365 adversely affected by the pandemic. Nevertheless, this study has efficiently and quickly  
366 produced useful and valid results which have the potential to aid the development of future  
367 research and guide policy.

#### 368 *Interpretation and implications for policy, practice and research*

369 Despite these encouraging data, it is not possible to ascertain from the numbers alone which  
370 are the key contributing factors to improving uptake. This is a key avenue of future research  
371 as lessons learnt can then be taken forward to optimise future immunisation programmes,  
372 both within the pandemic setting and beyond. While the concept of vaccine hesitancy is a  
373 popular media topic, previous studies have shown that the reasons given by parents for not

374 vaccinating their children are often much more practical. In fact, a pre-pandemic report by the  
375 Royal Society for Public Health in the UK found that the major barriers for parents who  
376 wanted to immunise their children were timing and availability of appointments and childcare  
377 duties. (26) Although for those who actively chose not to immunise their children, fear of  
378 side effects was a key concern and the negative effects of social media are increasing. (26)  
379 The lockdown has had a major effect on parental working patterns with almost 9 million UK  
380 employees furloughed and millions more working from home, often with the additional tasks  
381 of managing childcare as schools and nurseries were closed. (27) While this had made life  
382 significantly more challenging for many, more flexible working patterns may have made  
383 attending immunisation appointments easier for some.

384 Jarchow-MacDonald and colleagues (28) from NHS Lothian (which consists of HSCPs  
385 Edinburgh, West Lothian, East Lothian and Midlothian) have suggested that ensuring the  
386 accessibility of immunisation centres, either by public transport or by providing mobile  
387 services to shielding families, was important in maintaining uptake during the pandemic, as  
388 was directly communicating with families with a pre-appointment phone call and reminder  
389 postcards. This gave families an opportunity to discuss the immunisation with a healthcare  
390 professional, a strategy that has been showed to be important in addressing parental concerns.  
391 (29) In fact, the reminder alone may have been sufficient to encourage parents to attend the  
392 first appointment. (30) The clear commitment of the Scottish Government to maintain the  
393 immunisation programme was also felt to be an important factor. (28)

394 In England, Bell et al (31) conducted a large scale online survey of parents of children under  
395 the age of 18 months to assess their experiences of accessing immunisations during the early  
396 part of the UK lockdown (19<sup>th</sup> April- 11<sup>th</sup> May 2020). They highlighted the uncertainty of  
397 some families about whether the immunisation service was continuing, particularly amongst  
398 non-white ethnic groups. While most felt it was important that their child was immunised on

399 time, Bell et al reported that many parents felt the risk of catching a vaccine-preventable  
400 infectious disease was reduced due to limited mixing with others. This suggests that an  
401 enhanced appreciation of the utility of immunisation was not a major motivator for parents to  
402 ensure they attended the immunisation appointments. These issues may well be reflected in  
403 the fall in immunisation uptake in England during the earlier part of lockdown reported here  
404 and a delay in receiving the first dose 6-in-1 may well led to delays in subsequent doses  
405 meaning the infants were unable to ‘catch-up’ by six months of age.

406 Other factors which may have had an impact on promoting timely immunisation uptake could  
407 include a reduction in fever, cough and colds which may otherwise have caused parents to  
408 delay immunisations. Though specific data on this point are lacking, a significant fall in the  
409 detection of Rhinovirus in adults was observed in 2020 compared to 2019 (32) suggests that  
410 ‘normal’ childhood respiratory infection are likely to have decreased. More work is required  
411 to fully dissect the key factors in improving timely preschool immunisation uptake in  
412 Scotland. Clarity and publicity about the continuation of the immunisation programmes,  
413 telephone reminders and the opportunity to discuss with healthcare professions seem likely to  
414 have had the most impact.

#### 415 *Conclusions*

416 The ongoing COVID-19 pandemic continues to stretch health services and adversely affect  
417 all areas of life, with children disproportionately bearing the burden of the indirect  
418 consequences of pandemic control measures such as the closure of schools and limited social  
419 contact. However, opportunities have also been created in terms of enhanced surveillance of  
420 health programmes. In this study, we have used such data to investigate the effect of the  
421 pandemic on infant and preschool immunisation uptake. We have demonstrated that a robust  
422 child immunisation service can continue to deliver high and even increasing uptake rates.

423 Families will respond despite the many difficulties they face, to ensure that children continue  
424 to be protected against vaccine-preventable diseases. The challenge now is to use and expand  
425 on this knowledge to promote future vaccination programmes, including those targeting  
426 SARS-CoV-2.

427 **Acknowledgments**

428 We thank Public Health Scotland for making the data publicly available and acknowledge the  
429 support of the HDR UK BREATHE Hub and EAVE II collaborators.

430

431 **References**

- 432 1. Prime minister's statement on coronavirus (COVID 19): 23 March 2020 [press  
433 release]. 2020. Available from [https://www.gov.uk/government/speeches/pm-address-to-the-](https://www.gov.uk/government/speeches/pm-address-to-the-nation-on-coronavirus-23-march-2020)  
434 [nation-on-coronavirus-23-march-2020](https://www.gov.uk/government/speeches/pm-address-to-the-nation-on-coronavirus-23-march-2020), last accessed 25<sup>th</sup> May 2021
- 435 2. Scottish Government. Re-mobilise, Reciver, Re-design: th framework for NHS  
436 Scotland. 2020. Available from [https://www.gov.scot/publications/re-mobilise-recover-re-](https://www.gov.scot/publications/re-mobilise-recover-re-design-framework-nhs-scotland/)  
437 [design-framework-nhs-scotland/](https://www.gov.scot/publications/re-mobilise-recover-re-design-framework-nhs-scotland/), last accessed 25<sup>th</sup> May 2021
- 438 3. Mulholland RH, Wood R, Stagg HR, et al. Impact of COVID-19 on accident and  
439 emergency attendances and emergency and planned hospital admissions in Scotland: an  
440 interrupted time-series analysis. *J R Soc Med.* 2020;113(11):444-53.
- 441 4. Joint Committee on Vaccination and Immunisation. JCVI statement on immunisation  
442 prioritisation 2020. Available from: [https://www.gov.uk/government/publications/jcvi-](https://www.gov.uk/government/publications/jcvi-statement-on-immunisation-prioritisation/statement-from-jcvi-on-immunisation-prioritisation)  
443 [statement-on-immunisation-prioritisation/statement-from-jcvi-on-immunisation-](https://www.gov.uk/government/publications/jcvi-statement-on-immunisation-prioritisation/statement-from-jcvi-on-immunisation-prioritisation)  
444 [prioritisation](https://www.gov.uk/government/publications/jcvi-statement-on-immunisation-prioritisation/statement-from-jcvi-on-immunisation-prioritisation), last accessed 25<sup>th</sup> May 2021
- 445 5. Götzinger F, Santiago-García B, Noguera-Julián A, et al. COVID-19 in children and  
446 adolescents in Europe: a multinational, multicentre cohort study. *Lancet Child Adolesc*  
447 *Health.* 2020;4(9):653-61.
- 448 6. Viner RM, Mytton OT, Bonell C, et al. Susceptibility to SARS-CoV-2 Infection  
449 Among Children and Adolescents Compared With Adults: A Systematic Review and Meta-  
450 analysis. *JAMA Pediatr.* 2020.
- 451 7. Araújo LA, Veloso CF, Souza MC, Azevedo JMC, Tarro G. The potential impact of  
452 the COVID-19 pandemic on child growth and development: a systematic review. *J Pediatr*  
453 *(Rio J).* 2020.
- 454 8. RCPCH workforce team. The impact of COVID - 19 on child health services -  
455 report. 7<sup>th</sup> May 2020. Available from <https://www.rcpch.ac.uk/sites/default/files/managed->



456 pdf/Impact%20-of-COVID-19-child-health-services-web.pdf.pdf, last accessed 25<sup>th</sup> May  
457 2021.

458 9. Saxena S, Skirrow H, Bedford H. Routine vaccination during covid-19 pandemic  
459 response. *BMJ*. 2020;369:m2392.

460 10. World Health Organization, WHO and UNICEF warn of a decline in vaccinations  
461 during COVID-19 [press release 15 July 2020]. Geneva/New York. Available from  
462 [https://www.who.int/news/item/15-07-2020-who-and-unicef-warn-of-a-decline-in-](https://www.who.int/news/item/15-07-2020-who-and-unicef-warn-of-a-decline-in-vaccinations-during-covid-19)  
463 [vaccinations-during-covid-19](https://www.who.int/news/item/15-07-2020-who-and-unicef-warn-of-a-decline-in-vaccinations-during-covid-19), last accessed 25<sup>th</sup> May 2021.

464 11. McDonald HI, Tessier E, White JM, et al. Early impact of the coronavirus disease  
465 (COVID-19) pandemic and physical distancing measures on routine childhood vaccinations  
466 in England, January to April 2020. *Euro Surveill*. 2020;25(19).

467 12. Chandir S, Siddiqi DA, Mehmood M, et al. Impact of COVID-19 pandemic response  
468 on uptake of routine immunizations in Sindh, Pakistan: An analysis of provincial electronic  
469 immunization registry data. *Vaccine*. 2020;38(45):7146-55.

470 13. Jensen C, McKerrow NH. Child health services during a COVID-19 outbreak in  
471 KwaZulu-Natal Province, South Africa. *S Afr Med J*. 2020;0(0):13185.

472 14. Zhong Y, Clapham HE, Aishworiya R, et al. Childhood vaccinations: Hidden impact  
473 of COVID-19 on children in Singapore. *Vaccine*. 2021;39(5):780-5.

474 15. Santoli JM, Lindley MC, DeSilva MB, et al. Effects of the COVID-19 Pandemic on  
475 Routine Pediatric Vaccine Ordering and Administration - United States, 2020. *MMWR Morb*  
476 *Mortal Wkly Rep*. 2020;69(19):591-3.

477 16. Department of Health. Immunisation against infectious disease: The Green book.  
478 Public Health England; 2021.

- 479 17. PM announces easing of lockdown restrictions: 23 June 2020 [press release]. Available  
480 from [https://www.gov.uk/government/news/pm-announces-easing-of-lockdown-restrictions-](https://www.gov.uk/government/news/pm-announces-easing-of-lockdown-restrictions-23-june-2020)  
481 [23-june-2020](https://www.gov.uk/government/news/pm-announces-easing-of-lockdown-restrictions-23-june-2020), last accessed 25<sup>th</sup> May 2021
- 482 18. Scottish Government. Scotland's routemap through and out of the crisis. 2020.  
483 Available from [https://www.gov.scot/publications/coronavirus-covid-19-framework-](https://www.gov.scot/publications/coronavirus-covid-19-framework-decision-making-scotlands-route-map-through-out-crisis/pages/2/2020)  
484 [decision-making-scotlands-route-map-through-out-crisis/pages/2/2020](https://www.gov.scot/publications/coronavirus-covid-19-framework-decision-making-scotlands-route-map-through-out-crisis/pages/2/2020). last accessed 25<sup>th</sup>  
485 May 2020
- 486 19. Scottish Government . Introducing the Scottish Index of Multiple Deprivation 2020.  
487 National statistics publication; 2020.
- 488 20. von Elm E, Altman DG, Egger M, et al. The Strengthening the Reporting of  
489 Observational Studies in Epidemiology (STROBE) statement: guidelines for reporting  
490 observational studies. *J Clin Epidemiol*. 2008;61(4):344-9.
- 491 21. Benchimol EI, Smeeth L, Guttman A, et al. The REporting of studies Conducted  
492 using Observational Routinely-collected health Data (RECORD) statement. *PLoS Med*.  
493 2015;12(10):e1001885.
- 494 22. Haider EA, Willocks LJ, Anderson N. Identifying inequalities in childhood  
495 immunisation uptake and timeliness in southeast Scotland, 2008-2018: A retrospective cohort  
496 study. *Vaccine*. 2019;37(37):5614-24.
- 497 23. Forster AS, Rockliffe L, Chorley AJ, et al. Ethnicity-specific factors influencing  
498 childhood immunisation decisions among Black and Asian Minority Ethnic groups in the  
499 UK: a systematic review of qualitative research. *J Epidemiol Community Health*.  
500 2017;71(6):544-9.
- 501 24. National Office of Statistics, National Records of Scotland 2011 census aggregate  
502 data Scotland NRo, Northern, 2016. Available from  
503 <http://dx.doi.org/10.5257/census/aggregate-2011-1>, last accessed 25<sup>th</sup> May 2021

- 504 25. Public Health Scotland Data and Intelligence. Childhood Immunisation Statistics  
505 Scotland - Quarter ending 30 September 2019. 2019. Available from  
506 [https://www.isdscotland.org/Health-Topics/Child-Health/publications/data-](https://www.isdscotland.org/Health-Topics/Child-Health/publications/data-tables2017.asp?id=2574#2574)  
507 [tables2017.asp?id=2574#2574](https://www.isdscotland.org/Health-Topics/Child-Health/publications/data-tables2017.asp?id=2574#2574), last accessed 25<sup>th</sup> May 2021
- 508 26. Royal Society for Public Health. Moving the needle: Promoting vaccination uptake  
509 across the life course. 2019. Available from  
510 <https://www.rsph.org.uk/static/uploaded/3b82db00-a7ef-494c-85451e78ce18a779.pdf>, last  
511 accessed 25<sup>th</sup> May 2021
- 512 27. HM revenue and Customs. Coronavirus Job Retention Scheme Official Statistics.  
513 2020. Available from  
514 [https://assets.publishing.service.gov.uk/government/uploads/system/uploads/attachment\\_data](https://assets.publishing.service.gov.uk/government/uploads/system/uploads/attachment_data/file/891249/Coronavirus_Job_Retention_Scheme_Statistics_June_2020.pdf)  
515 [/file/891249/Coronavirus\\_Job\\_Retention\\_Scheme\\_Statistics\\_June\\_2020.pdf](https://assets.publishing.service.gov.uk/government/uploads/system/uploads/attachment_data/file/891249/Coronavirus_Job_Retention_Scheme_Statistics_June_2020.pdf), last accessed  
516 25<sup>th</sup> May 2021
- 517 28. Jarchow-MacDonald AA, Burns R, Miller J, Kerr L, Willocks LJ. Keeping childhood  
518 immunisation rates stable during the COVID-19 pandemic. *Lancet Infect Dis.* 2021.
- 519 29. Campbell H, Edwards A, Letley L, Bedford H, Ramsay M, Yarwood J. Changing  
520 attitudes to childhood immunisation in English parents. *Vaccine.* 2017;35(22):2979-85.
- 521 30. Jacobson Vann JC, Szilagyi P. Patient reminder and patient recall systems to improve  
522 immunization rates. *Cochrane Database Syst Rev.* 2005(3):CD003941.
- 523 31. Bell S, Clarke R, Paterson P, Mounier-Jack S. Parents' and guardians' views and  
524 experiences of accessing routine childhood vaccinations during the coronavirus (COVID-19)  
525 pandemic: A mixed methods study in England. *PLoS One.* 2020;15(12):e0244049.
- 526 32. Poole S, Brendish NJ, Tanner AR, Clark TW. Physical distancing in schools for  
527 SARS-CoV-2 and the resurgence of rhinovirus. *Lancet Respir Med.* 2020;8(12):e92-e3.

528 **Supporting information captions**

529 **S1 Fig:** Percentage uptake by HSCP for 2019 (pale orange) and lockdown (dark orange) with  
530 HSCP ordered by uptake for 2019 (note: this varies by immunisation). Dashed horizontal  
531 lines indicated the mean uptake for all of Scotland for the time period of the corresponding  
532 colour. A = 6in1 immunisation, B = MMR.

533 **S2 Fig:** Choropleth maps showing all (significant or not) percentage point changes between  
534 2019 and lockdown for each HSCP for all immunisations.

535 **S3 Fig:** Absolute percentage change in uptake compared to 2019 for each immunisations and  
536 SIMD for each time period (A = pre lockdown, B= lockdown, C= post lockdown).  
537 Significance rates varied by immunisation and SIMD, for details see table S3.

538 **S4 Fig:** Combined odds ratio plot with 95% confidence intervals comparing each SIMD  
539 quintile (2-5) to SIMD 1-most deprived for 2019 (dark blue) and LD (light blue).

540 **S5 Fig:** Percentage of children in England immunised by 6 months of age (first, second and  
541 third dose 6in1) or 18 months of age (first dose MMR) from January 2019 to September  
542 2020. The start and end of the lockdown period is indicated by the dashed blue lines.

543 **S1 Table:** Percentage uptake of each immunisation by year (2019), month (Jan and Feb  
544 2020) or week as per data availability. W/B = week beginning.

545 **S2 Tables A-E:** Percentage uptake, percent point change in uptake compared to 2019 and  
546 significance level for this change for each HSCP at each time-period. Each table shows  
547 results for a different immunisation. Results were considered significant if  $p$ -value  $<0.05$  and  
548 95% CI did not include 1. Statistically significant  $p$  values are shaded green and significant  
549 results for the 2019-LD comparisons are plotted on Figure 2. HSCP = Health and Social Care

550 Partnership, OR = odds ratio, CI = confidence interval, NA = not applicable, PreLD = pre  
551 lockdown, LD = lockdown, PostLD = post lockdown. *p*-value rounded to 2 decimal places.

552 **S3 Table:** Uptake of pre-school immunisations by time period and SIMD and percent point  
553 change in uptake compared to baseline 2019. Odds ratio and 95% confidence intervals shown  
554 are for change in uptake compared to 2019. *p*-value rounded to 2 decimal places. LD =  
555 lockdown, NA = not applicable. Statistically significant change in uptake compared to 2019  
556 are shaded green.

557 **S4 Table:** To assess whether the differences between change in uptake were statistically  
558 significant between SIMD quintiles, the interaction between time period and SIMD quintile  
559 was added into the model. The baseline comparisons showed are for time period 2019 and  
560 deprivation quintile SIMD 1. ROR = ratio of odds ratio, calculated by taking the exponential  
561 function of the coefficient of the interaction term from the interaction model. If the 95%  
562 confidence intervals did not include 1, the interaction of time period and SIMD was  
563 considered statistically significant, that is; there was a significant difference in the level of  
564 change (2019- time period) between the deprivation quintile and SIMD 1. For example, the  
565 increase in uptake during lockdown for SIMD 5 was statistically greater than the increase in  
566 uptake for SIMD 1. The ROR can be used to calculate the odds ratio for uptake compared to  
567 the baseline levels by multiplying the ROR with the relevant OR in table S3. LD= lockdown,  
568 SIMD = Scottish Index of Multiple Deprivation, ns = not statistically significant (coloured  
569 green) = interaction was statistically significant. *p*-value rounded to 2 decimal places.

570 **S5 Table:** Scotland. Uptake of pre-school immunisations at an older age by time period and  
571 point percentage change from 2019 with odds ratio and 95% confidence intervals compared  
572 to baseline of 2019. Children are categorised into the time-period at which they became  
573 eligible for the immunisation as before and uptake data were extracted at a later stage when

574 they reached the ages indicated in the immunisation column. LD = lockdown, NA = not  
575 applicable. Statistically significant changes are coloured green.

576 **S6 Table:** England. Uptake of pre-school immunisations at an older age by time period and  
577 point percentage change from 2019 with odds ratio and 95% confidence intervals compared  
578 to baseline of 2019. Children are categorised into the time-period at which they became  
579 eligible for the immunisation as before and uptake data were extracted at a later stage when  
580 they reached the ages indicated in the immunisation column. LD = lockdown, NA = not  
581 applicable. Statistically significant changes are coloured green.

582 **S1 File: Childhood immunisation V1.0 Final analysis plan**

583 **S2 File: Supplemental methods**

584 **S3 File: RECORD plus STROBE checklist**

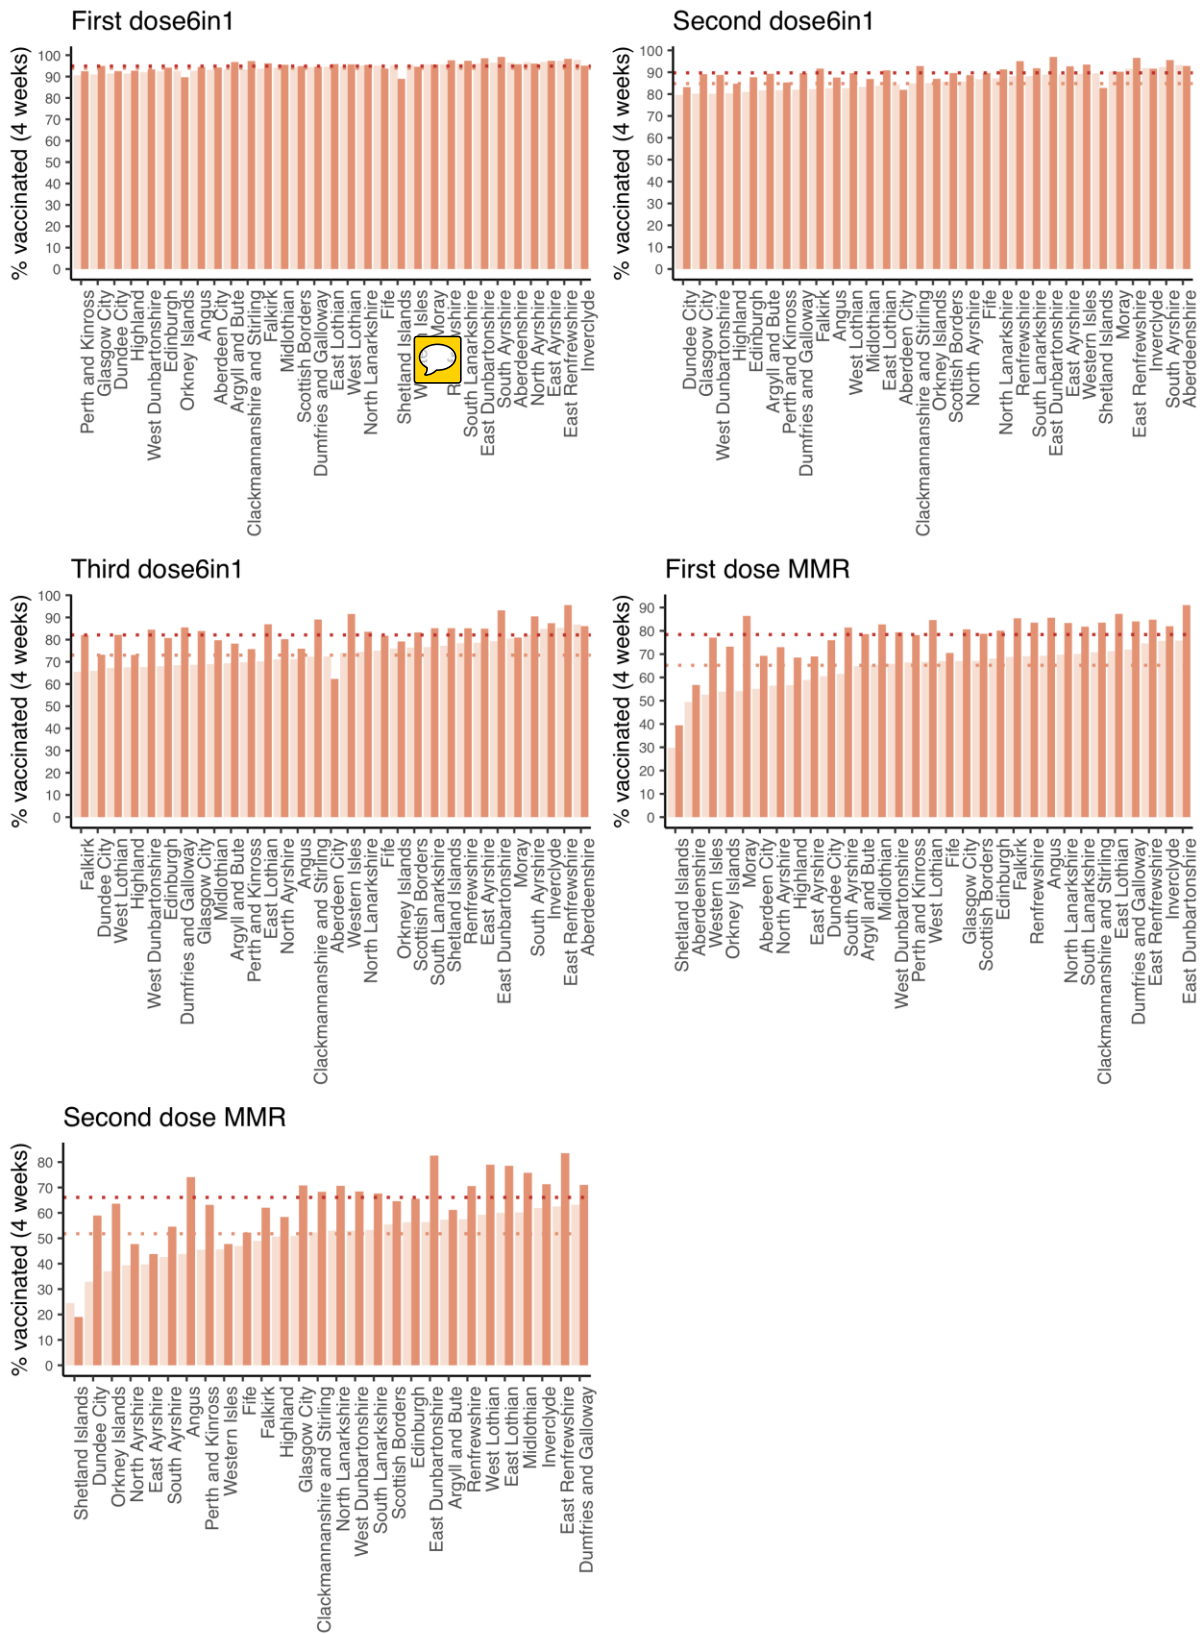

Time period 2019 LD

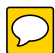

First 6in1 % change from 2019

% point change LD vs 2019

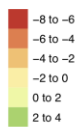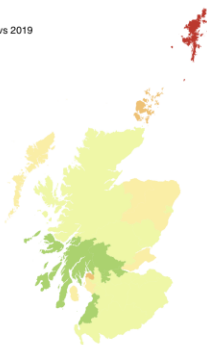

Second 6in1 % change from 2019

% point change LD vs 2019

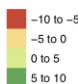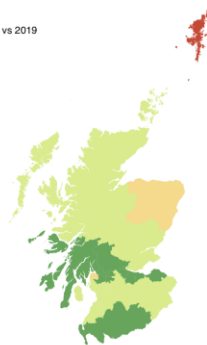

Third 6in1 % change from 2019

% point change LD vs 2019

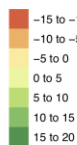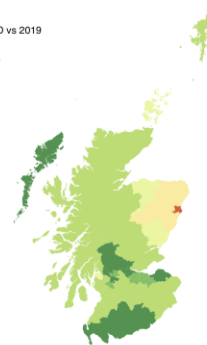

First MMR % change from 2019

% point change LD vs 2019

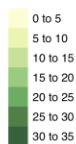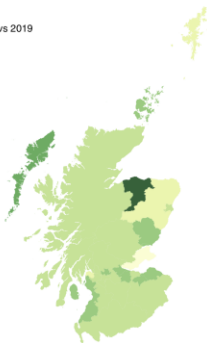

Second MMR % change from 2019

% point change LD vs 2019

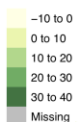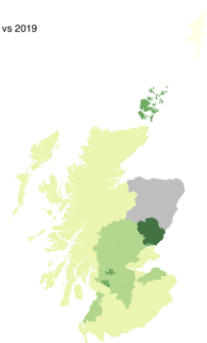



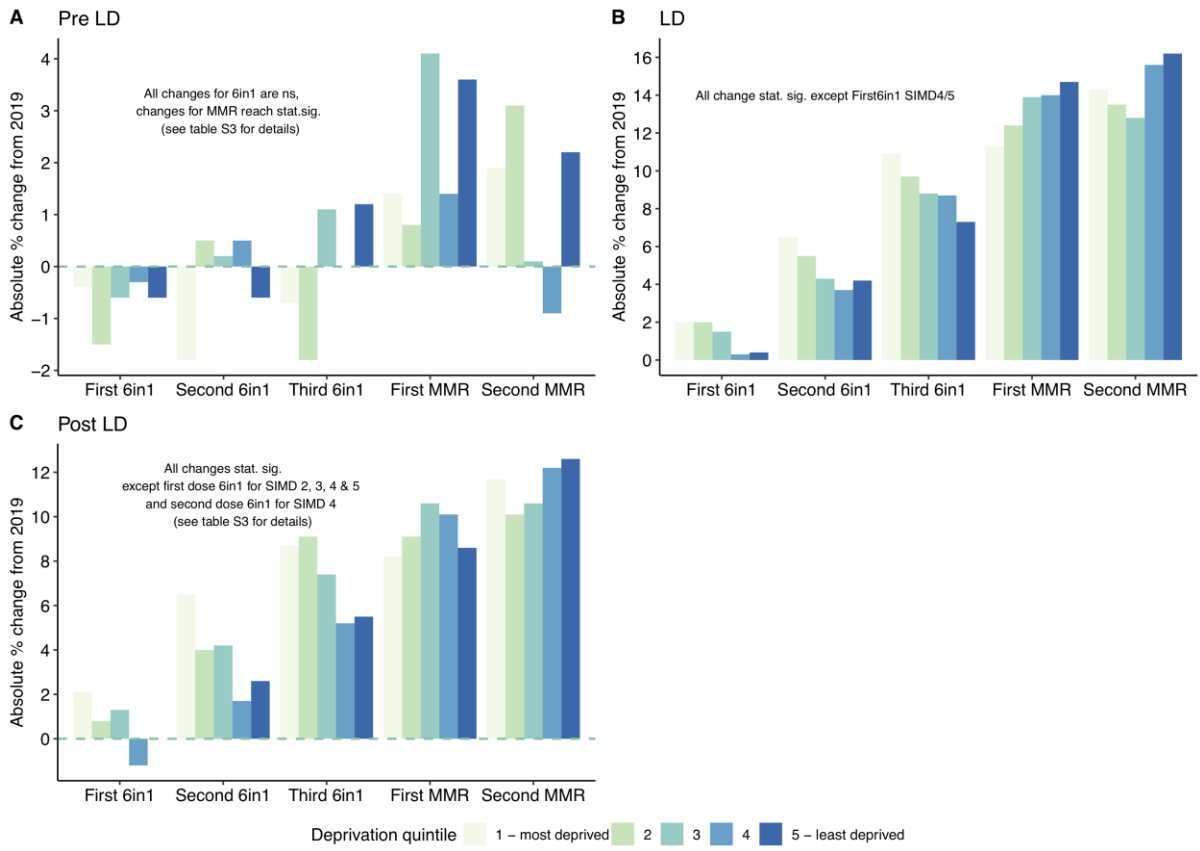

590

591



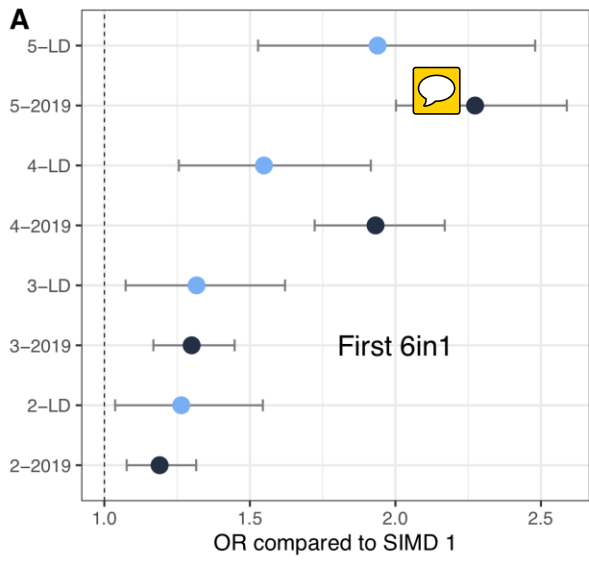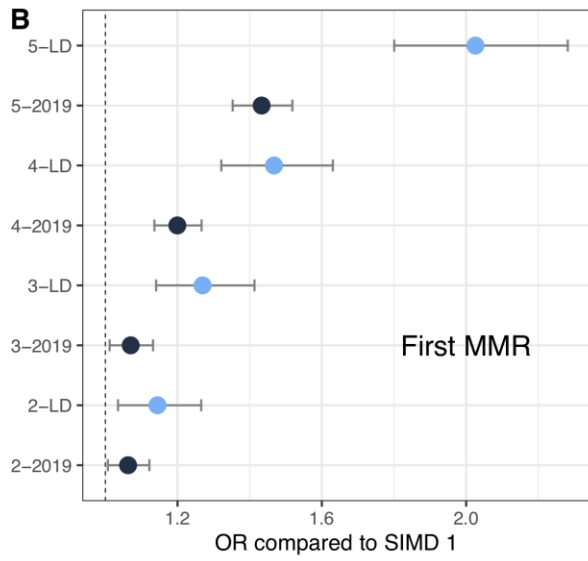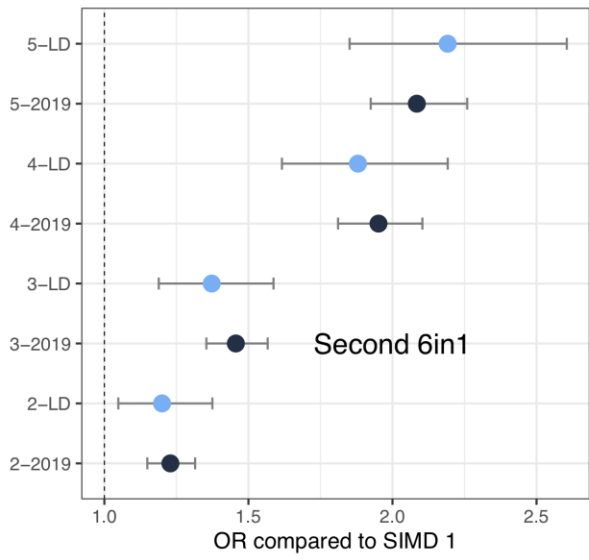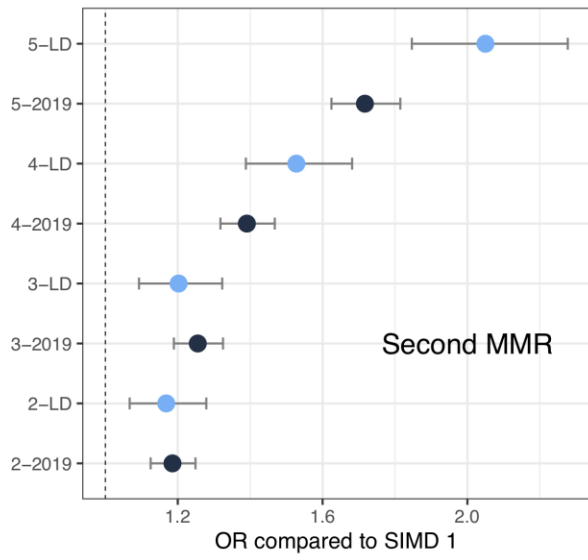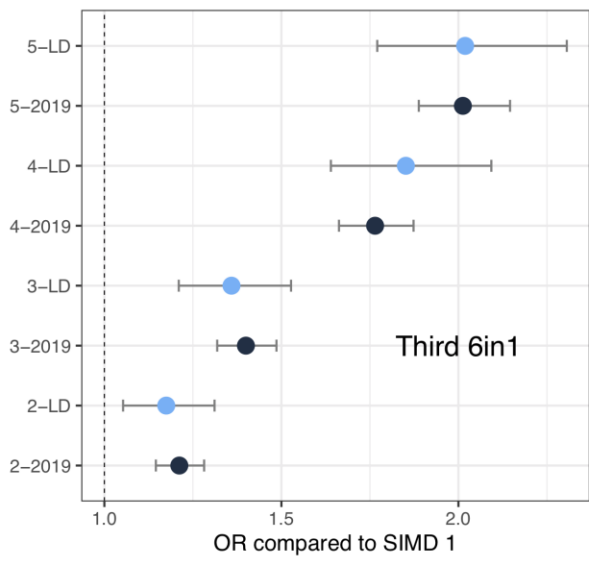

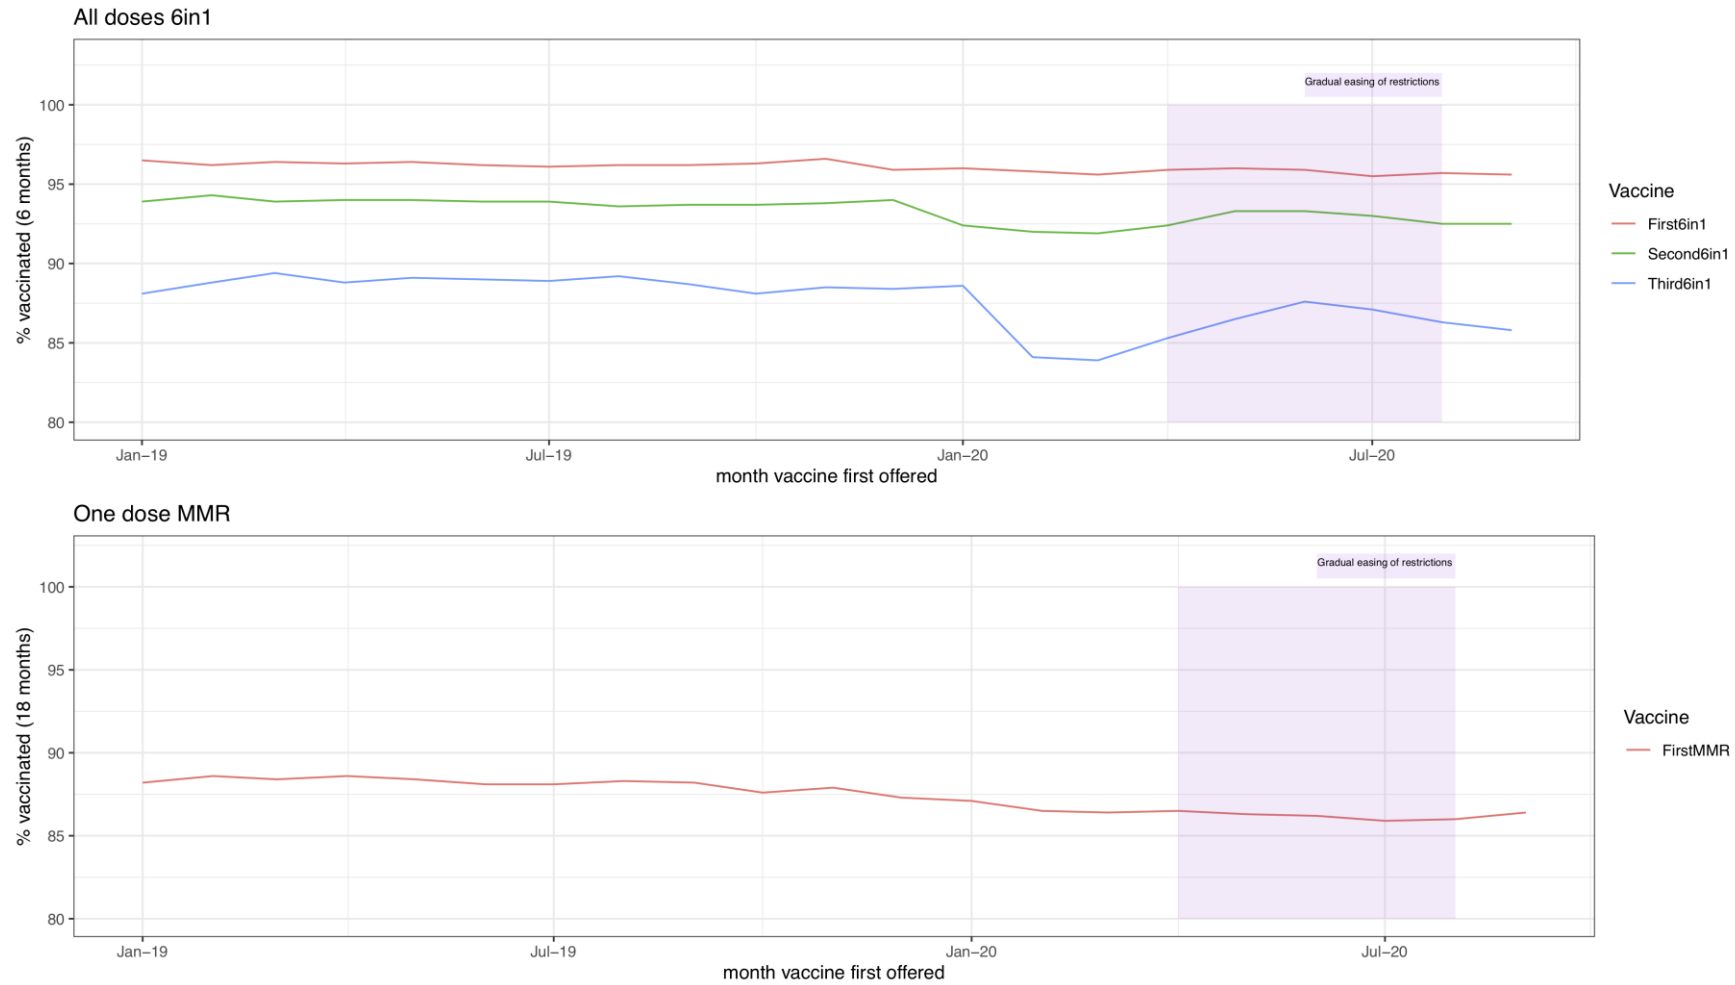

## 596 Tables S1-6

## 597 Supplementary Table S1

| <b>% uptake within 4 weeks of eligibility<br/>(number received/total eligible)</b> |                     |                       |                     |                       |                       |
|------------------------------------------------------------------------------------|---------------------|-----------------------|---------------------|-----------------------|-----------------------|
| <b>Time period</b>                                                                 | <b>First 6in1</b>   | <b>Second 6in1</b>    | <b>Third 6in1</b>   | <b>First MMR</b>      | <b>Second MMR</b>     |
| 2019                                                                               | 94<br>(47567/50609) | 84.8<br>(43221/50975) | 73<br>(37266/51083) | 65.2<br>(33935/52015) | 51.8<br>(25844/49940) |
| Jan-20                                                                             | 94.4<br>(3393/3593) | 84.1<br>(3101/3689)   | 70.9<br>(2916/4112) | 68.4<br>(2578/3767)   | 54.7<br>(2151/3934)   |
| Feb-20                                                                             | 94.3<br>(4079/4325) | 86.7<br>(3878/4472)   | 74<br>(3403/4600)   | 69.8<br>(3309/4739)   | 59.2<br>(2845/4804)   |
| W/B 02-MAR-20                                                                      | 92.8<br>(813/876)   | 84.6<br>(729/862)     | 73.4<br>(628/856)   | 67.2<br>(636/947)     | 54.3<br>(491/904)     |
| W/B 09-MAR-20                                                                      | 93.4<br>(883/945)   | 84.3<br>(763/905)     | 72.4<br>(624/862)   | 66.1<br>(656/993)     | 51<br>(474/930)       |
| W/B 16-MAR-20                                                                      | 91.5<br>(935/1022)  | 82.5<br>(635/770)     | 73.1<br>(705/964)   | 65.3<br>(603/924)     | 46.5<br>(429/923)     |
| W/B 23-MAR-20                                                                      | 93.2<br>(846/908)   | 83.7<br>(761/909)     | 73.3<br>(644/879)   | 64.4<br>(588/913)     | 46.9<br>(430/916)     |
| W/B 30-MAR-20                                                                      | 95<br>(864/909)     | 85.5<br>(749/876)     | 75.5<br>(651/862)   | 71.1<br>(692/973)     | 48.6<br>(472/972)     |
| W/B 06-APR-20                                                                      | 92.6<br>(892/963)   | 86.9<br>(821/945)     | 76<br>(688/905)     | 69.7<br>(636/912)     | 56<br>(509/909)       |
| W/B 13-APR-20                                                                      | 93.9<br>(835/889)   | 87.2<br>(891/1022)    | 77<br>(593/770)     | 76.9<br>(749/974)     | 58.4<br>(558/955)     |
| W/B 20-APR-20                                                                      | 95.1<br>(851/895)   | 88.7<br>(805/908)     | 78<br>(709/909)     | 77.5<br>(732/945)     | 63.3<br>(567/896)     |
| W/B 27-APR-20                                                                      | 96<br>(881/918)     | 91<br>(827/909)       | 79.8<br>(699/876)   | 80.3<br>(789/982)     | 65.6<br>(563/858)     |
| W/B 04-MAY-20                                                                      | 94.7<br>(838/885)   | 88.1<br>(848/963)     | 80<br>(756/945)     | 80.4<br>(781/971)     | 66.9<br>(590/882)     |
| W/B 11-MAY-20                                                                      | 96.3<br>(894/928)   | 89.1<br>(792/889)     | 82.7<br>(845/1022)  | 82.8<br>(815/984)     | 70.6<br>(653/925)     |
| W/B 18-MAY-20                                                                      | 95.5<br>(857/897)   | 91.6<br>(820/895)     | 84.7<br>(769/908)   | 81.3<br>(784/964)     | 70.6<br>(602/853)     |
| W/B 25-MAY-20                                                                      | 96.2<br>(840/873)   | 92.7<br>(851/918)     | 86.1<br>(783/909)   | 83.2<br>(820/986)     | 74.2<br>(636/857)     |
| W/B 01-JUN-20                                                                      | 97.1<br>(835/860)   | 91<br>(805/885)       | 83.1<br>(800/963)   | 80.9<br>(728/900)     | 73.1<br>(602/824)     |
| W/B 08-JUN-20                                                                      | 95<br>(899/946)     | 93.5<br>(868/928)     | 82.9<br>(737/889)   | 81.9<br>(801/978)     | 76.5<br>(739/966)     |
| W/B 15-JUN-20                                                                      | 95.9                | 91                    | 84.7                | 81.7                  | 70.8                  |

|               |                   |                   |                   |                    |                   |
|---------------|-------------------|-------------------|-------------------|--------------------|-------------------|
|               | (880/918)         | (816/897)         | (758/895)         | (793/971)          | (644/909)         |
| W/B 22-JUN-20 | 95.5<br>(804/842) | 92.1<br>(804/873) | 85.6<br>(786/918) | 80.6<br>(789/979)  | 70.4<br>(650/923) |
| W/B 29-JUN-20 | 94.8<br>(795/839) | 92.9<br>(799/860) | 86.6<br>(766/885) | 79.3<br>(783/987)  | 68.1<br>(608/893) |
| W/B 06-JUL-20 | 96.4<br>(863/895) | 90.5<br>(856/946) | 87.6<br>(813/928) | 76.8<br>(788/1026) | 71.4<br>(637/892) |
| W/B 13-JUL-20 | 95.2<br>(894/939) | 90.8<br>(834/918) | 85.1<br>(763/897) | 80.4<br>(805/1001) | 69.5<br>(629/905) |
| W/B 20-JUL-20 | 96.8<br>(864/893) | 89<br>(749/842)   | 85.1<br>(743/873) | 80<br>(813/1016)   | 68.2<br>(597/875) |
| W/B 27-JUL-20 | 94.6<br>(885/936) | 89<br>(747/839)   | 85.6<br>(736/860) | 79.5<br>(796/1001) | 66<br>(617/935)   |
| W/B 03-AUG-20 | 95<br>(916/964)   | 90.4<br>(809/895) | 83.2<br>(787/946) | 78.3<br>(808/1032) | 70<br>(656/937)   |
| W/B 10-AUG-20 | 95.1<br>(847/891) | 89.1<br>(837/939) | 82.4<br>(756/918) | 77.2<br>(761/986)  | 65.9<br>(602/913) |
| W/B 17-AUG-20 | 95<br>(914/962)   | 89.5<br>(799/893) | 80.6<br>(679/842) | 75.9<br>(749/987)  | 65.8<br>(571/868) |
| W/B 24-AUG-20 | 94.7<br>(946/999) | 87.1<br>(815/936) | 81.3<br>(682/839) | 73.8<br>(721/977)  | 61.4<br>(551/897) |
| W/B 31-AUG-20 | 94.9<br>(885/933) | 88.4<br>(852/964) | 81.2<br>(727/895) | 74<br>(709/958)    | 61<br>(540/885)   |
| W/B 07-SEP-20 | 95.1<br>(939/987) | 89.1<br>(794/891) | 79.7<br>(748/939) | 72.9<br>(725/995)  | 63.5<br>(589/927) |
| W/B 14-SEP-20 | 94<br>(885/941)   | 87.6<br>(843/962) | 79.3<br>(708/893) | 74<br>(751/1015)   | 61.9<br>(569/919) |
| W/B 21-SEP-20 | 93.5<br>(864/924) | 88.3<br>(882/999) | 77.4<br>(724/936) | 73.4<br>(782/1066) | 58.8<br>(549/933) |
| W/B 28-SEP-20 | 94.5<br>(879/930) | 88.7<br>(828/933) | 77.2<br>(744/964) | 71.2<br>(734/1031) | 59.3<br>(544/917) |

599 **Supplementary Tables S2**600 **A First dose 6in1**

601

| HSCP                          | Time period | % uptake (within 4 weeks) | Number received | Number eligible | % point change from 2019 | OR compared to 2019 (95% CI) | p value |
|-------------------------------|-------------|---------------------------|-----------------|-----------------|--------------------------|------------------------------|---------|
| Aberdeen City                 | 2019        | 93.2                      | 2077            | 2228            | NA                       | NA                           | NA      |
|                               | PreLD       | 90.5                      | 382             | 425             | -2.7                     | 0.65<br>(0.45-0.92)          | 0.02    |
|                               | LD          | 94.2                      | 696             | 739             | 1                        | 1.18<br>(0.83-1.67)          | 0.36    |
|                               | PostLD      | 91.6                      | 334             | 365             | -1.6                     | 0.78<br>(0.52-1.17)          | 0.24    |
| Aberdeenshire                 | 2019        | 96.6                      | 2452            | 2538            | NA                       | NA                           | NA      |
|                               | PreLD       | 95.8                      | 513             | 540             | -0.8                     | 0.67<br>(0.43-1.04)          | 0.07    |
|                               | LD          | 95.7                      | 793             | 830             | -0.9                     | 0.75<br>(0.51-1.11)          | 0.16    |
|                               | PostLD      | 92.1                      | 354             | 385             | -4.5                     | 0.4<br>(0.26-0.61)           | <0.001  |
| Angus                         | 2019        | 92.7                      | 939             | 1013            | NA                       | NA                           | NA      |
|                               | PreLD       | 92.4                      | 205             | 219             | -0.3                     | 1.15<br>(0.64-2.08)          | 0.63    |
|                               | LD          | 94.5                      | 312             | 330             | 1.8                      | 1.37<br>(0.8-2.32)           | 0.25    |
|                               | PostLD      | 93.9                      | 158             | 169             | 1.2                      | 1.13<br>(0.59-2.18)          | 0.71    |
| Argyll and Bute               | 2019        | 93.3                      | 608             | 652             | NA                       | NA                           | NA      |
|                               | PreLD       | 93.4                      | 140             | 150             | 0.1                      | 1.01<br>(0.5-2.06)           | 0.97    |
|                               | LD          | 96.8                      | 234             | 243             | 3.5                      | 1.88<br>(0.9-3.92)           | 0.09    |
|                               | PostLD      | 91.3                      | 96              | 106             | -2                       | 0.69<br>(0.34-1.43)          | 0.32    |
| Clackmannanshire and Stirling | 2019        | 93.3                      | 1092            | 1170            | NA                       | NA                           | NA      |
|                               | PreLD       | 92.9                      | 272             | 288             | -0.4                     | 1.21<br>(0.7-2.11)           | 0.49    |
|                               | LD          | 97.3                      | 398             | 408             | 4                        | 2.84<br>(1.46-5.55)          | <0.001  |

|                       |        |      |      |      |      |                      |      |
|-----------------------|--------|------|------|------|------|----------------------|------|
|                       | PostLD | 95.9 | 191  | 199  | 2.6  | 1.71<br>(0.81-3.59)  | 0.16 |
| Dumfries and Galloway | 2019   | 94.4 | 1116 | 1182 | NA   | NA                   | NA   |
|                       | PreLD  | 91.1 | 231  | 247  | -3.3 | 0.85<br>(0.49-1.5)   | 0.58 |
|                       | LD     | 94.6 | 404  | 429  | 0.2  | 0.96<br>(0.59-1.54)  | 0.85 |
|                       | PostLD | 93.7 | 194  | 206  | -0.7 | 0.96<br>(0.51-1.8)   | 0.89 |
| Dundee City           | 2019   | 91.4 | 1289 | 1411 | NA   | NA                   | NA   |
|                       | PreLD  | 89.1 | 266  | 290  | -2.3 | 1.05<br>(0.66-1.66)  | 0.84 |
|                       | LD     | 92.5 | 426  | 461  | 1.1  | 1.15<br>(0.78-1.7)   | 0.48 |
|                       | PostLD | 92.1 | 206  | 225  | 0.7  | 1.03<br>(0.62-1.7)   | 0.92 |
| East Ayrshire         | 2019   | 96.9 | 1122 | 1158 | NA   | NA                   | NA   |
|                       | PreLD  | 95.1 | 241  | 252  | -1.8 | 0.7<br>(0.35-1.4)    | 0.32 |
|                       | LD     | 97.4 | 420  | 431  | 0.5  | 1.23<br>(0.62-2.43)  | 0.56 |
|                       | PostLD | 94.1 | 181  | 193  | -2.8 | 0.48<br>(0.25-0.95)  | 0.03 |
| East Dunbartonshire   | 2019   | 96.1 | 958  | 997  | NA   | NA                   | NA   |
|                       | PreLD  | 95.7 | 187  | 193  | -0.4 | 1.27<br>(0.53-3.04)  | 0.59 |
|                       | LD     | 98.6 | 339  | 344  | 2.5  | 2.76<br>(1.08-7.06)  | 0.03 |
|                       | PostLD | 99.4 | 154  | 155  | 3.3  | 6.27<br>(0.86-45.96) | 0.07 |
| East Lothian          | 2019   | 94.6 | 1031 | 1090 | NA   | NA                   | NA   |
|                       | PreLD  | 93.9 | 194  | 204  | -0.7 | 1.11<br>(0.56-2.21)  | 0.77 |
|                       | LD     | 95.8 | 330  | 346  | 1.2  | 1.18<br>(0.67-2.08)  | 0.57 |
|                       | PostLD | 95.3 | 194  | 203  | 0.7  | 1.23<br>(0.6-2.53)   | 0.57 |
| East Renfrewshire     | 2019   | 97.4 | 868  | 891  | NA   | NA                   | NA   |
|                       | PreLD  | 96   | 193  | 201  | -1.4 | 0.64<br>(0.28-1.45)  | 0.28 |
|                       | LD     | 98.3 | 290  | 295  | 0.9  | 1.54                 | 0.39 |



|              |        |      |      |      |      |                     |        |
|--------------|--------|------|------|------|------|---------------------|--------|
|              |        |      |      |      |      | (0.58-4.08)         |        |
|              | PostLD | 97.4 | 149  | 153  | 0    | 0.99<br>(0.34-2.89) | 0.98   |
| Edinburgh    | 2019   | 92.5 | 4130 | 4464 | NA   | NA                  | NA     |
|              | PreLD  | 89.9 | 883  | 964  | -2.6 | 0.88<br>(0.68-1.14) | 0.33   |
|              | LD     | 94.2 | 1517 | 1613 | 1.7  | 1.28<br>(1.01-1.62) | 0.04   |
|              | PostLD | 94.4 | 751  | 796  | 1.9  | 1.35<br>(0.98-1.86) | 0.07   |
| Falkirk      | 2019   | 93.7 | 1382 | 1475 | NA   | NA                  | NA     |
|              | PreLD  | 95   | 291  | 308  | 1.3  | 1.15<br>(0.68-1.96) | 0.6    |
|              | LD     | 96.2 | 513  | 534  | 2.5  | 1.64<br>(1.01-2.67) | 0.04   |
|              | PostLD | 95.8 | 245  | 256  | 2.1  | 1.5<br>(0.79-2.84)  | 0.21   |
| Fife         | 2019   | 95.2 | 3234 | 3396 | NA   | NA                  | NA     |
|              | PreLD  | 93.4 | 700  | 744  | -1.8 | 0.8<br>(0.57-1.12)  | 0.19   |
|              | LD     | 93.7 | 1078 | 1150 | -1.5 | 0.75<br>(0.56-1)    | 0.05   |
|              | PostLD | 92.3 | 520  | 562  | -2.9 | 0.62<br>(0.44-0.88) | 0.01   |
| Glasgow City | 2019   | 91   | 5855 | 6435 | NA   | NA                  | NA     |
|              | PreLD  | 92.5 | 1254 | 1346 | 1.5  | 1.35<br>(1.07-1.7)  | 0.01   |
|              | LD     | 95   | 2029 | 2136 | 4    | 1.88<br>(1.52-2.32) | <0.001 |
|              | PostLD | 94.8 | 1069 | 1128 | 3.8  | 1.79<br>(1.36-2.36) | <0.001 |
| Highland     | 2019   | 91.4 | 1821 | 1992 | NA   | NA                  | NA     |
|              | PreLD  | 88.8 | 389  | 433  | -2.6 | 0.83<br>(0.59-1.18) | 0.3    |
|              | LD     | 92.8 | 587  | 635  | 1.4  | 1.15<br>(0.82-1.6)  | 0.42   |
|              | PostLD | 92.9 | 336  | 360  | 1.5  | 1.31<br>(0.84-2.05) | 0.23   |
| Inverclyde   | 2019   | 97.8 | 618  | 632  | NA   | NA                  | NA     |
|              | PreLD  | 96.9 | 146  | 151  | -0.9 | 0.66<br>(0.23-1.87) | 0.43   |

|                   |        |      |      |      |      |                     |      |
|-------------------|--------|------|------|------|------|---------------------|------|
|                   | LD     | 95.1 | 217  | 227  | -2.7 | 0.49<br>(0.22-1.12) | 0.09 |
|                   | PostLD | 97.1 | 96   | 99   | -0.7 | 0.72<br>(0.2-2.57)  | 0.62 |
| Midlothian        | 2019   | 94.1 | 1051 | 1117 | NA   | NA                  | NA   |
|                   | PreLD  | 94.4 | 212  | 226  | 0.3  | 0.95<br>(0.52-1.72) | 0.87 |
|                   | LD     | 95.5 | 336  | 352  | 1.4  | 1.32<br>(0.75-2.31) | 0.33 |
|                   | PostLD | 95.8 | 191  | 200  | 1.7  | 1.33<br>(0.65-2.72) | 0.43 |
| Moray             | 2019   | 95.7 | 788  | 823  | NA   | NA                  | NA   |
|                   | PreLD  | 95.2 | 209  | 222  | -0.5 | 0.71<br>(0.37-1.37) | 0.31 |
|                   | LD     | 95.6 | 295  | 310  | -0.1 | 0.87<br>(0.47-1.62) | 0.67 |
|                   | PostLD | 97.4 | 141  | 145  | 1.7  | 1.57<br>(0.55-4.47) | 0.4  |
| North Ayrshire    | 2019   | 96.8 | 1082 | 1118 | NA   | NA                  | NA   |
|                   | PreLD  | 98.2 | 261  | 270  | 1.4  | 0.96<br>(0.46-2.03) | 0.92 |
|                   | LD     | 96   | 371  | 386  | -0.8 | 0.82<br>(0.45-1.52) | 0.53 |
|                   | PostLD | 93.7 | 182  | 193  | -3.1 | 0.55<br>(0.28-1.1)  | 0.09 |
| North Lanarkshire | 2019   | 95.1 | 3337 | 3510 | NA   | NA                  | NA   |
|                   | PreLD  | 95.6 | 696  | 724  | 0.5  | 1.29<br>(0.86-1.94) | 0.22 |
|                   | LD     | 95.5 | 1049 | 1098 | 0.4  | 1.11<br>(0.8-1.54)  | 0.53 |
|                   | PostLD | 97.1 | 609  | 627  | 2    | 1.75<br>(1.07-2.87) | 0.03 |
| Orkney Islands    | 2019   | 92.6 | 189  | 204  | NA   | NA                  | NA   |
|                   | PreLD  | 100  | 28   | 28   | 7.4  | 1.16<br>(0.55-2.44) | 0.69 |
|                   | LD     | 89.7 | 53   | 59   | -2.9 | 1.27<br>(0.81-2.01) | 0.3  |
|                   | PostLD | 100  | 37   | 37   | 7.4  | 0.8<br>(0.48-1.33)  | 0.39 |
| Perth and Kinross | 2019   | 90.6 | 1124 | 1240 | NA   | NA                  | NA   |
|                   | PreLD  | 87.4 | 225  | 255  | -3.2 | 0.77                | 0.24 |

|                     |        |      |      |      |      |                      |      |
|---------------------|--------|------|------|------|------|----------------------|------|
|                     |        |      |      |      |      | (0.51-1.19)          |      |
|                     | LD     | 92.5 | 411  | 444  | 1.9  | 1.29<br>(0.86-1.92)  | 0.22 |
|                     | PostLD | 93.2 | 191  | 206  | 2.6  | 1.31<br>(0.75-2.3)   | 0.34 |
| Renfrewshire        | 2019   | 95.7 | 1617 | 1689 | NA   | NA                   | NA   |
|                     | PreLD  | 97.8 | 377  | 385  | 2.1  | 2.1<br>(1-4.39)      | 0.05 |
|                     | LD     | 97.6 | 587  | 602  | 1.9  | 1.74<br>(0.99-3.06)  | 0.05 |
|                     | PostLD | 96.6 | 239  | 248  | 0.9  | 1.18<br>(0.58-2.4)   | 0.64 |
| Scottish Borders    | 2019   | 94.3 | 838  | 889  | NA   | NA                   | NA   |
|                     | PreLD  | 93.9 | 183  | 193  | -0.4 | 1.11<br>(0.56-2.23)  | 0.76 |
|                     | LD     | 94.9 | 291  | 306  | 0.6  | 1.18<br>(0.65-2.13)  | 0.58 |
|                     | PostLD | 95.8 | 142  | 148  | 1.5  | 1.44<br>(0.61-3.42)  | 0.41 |
| Shetland Islands    | 2019   | 95.3 | 203  | 213  | NA   | NA                   | NA   |
|                     | PreLD  | 86.4 | 22   | 25   | -8.9 | 0.36<br>(0.09-1.41)  | 0.14 |
|                     | LD     | 89   | 54   | 60   | -6.3 | 1.27<br>(0.81-2.01)  | 0.3  |
|                     | PostLD | 89.6 | 33   | 37   | -5.8 | 0.8<br>(0.48-1.33)   | 0.39 |
| South Ayrshire      | 2019   | 96.5 | 844  | 875  | NA   | NA                   | NA   |
|                     | PreLD  | 94.1 | 187  | 198  | -2.4 | 0.62<br>(0.31-1.26)  | 0.19 |
|                     | LD     | 99.2 | 274  | 277  | 2.7  | 3.35<br>(1.02-11.06) | 0.05 |
|                     | PostLD | 97.4 | 148  | 152  | 0.9  | 1.36<br>(0.47-3.91)  | 0.57 |
| South Lanarkshire   | 2019   | 96   | 3066 | 3194 | NA   | NA                   | NA   |
|                     | PreLD  | 94.6 | 622  | 646  | -1.4 | 1.08<br>(0.69-1.69)  | 0.73 |
|                     | LD     | 97.4 | 1084 | 1113 | 1.4  | 1.56<br>(1.04-2.35)  | 0.03 |
|                     | PostLD | 96.4 | 484  | 502  | 0.4  | 1.12<br>(0.68-1.86)  | 0.65 |
| West Dunbartonshire | 2019   | 92.1 | 796  | 864  | NA   | NA                   | NA   |

|               |        |      |      |      |      |                     |      |
|---------------|--------|------|------|------|------|---------------------|------|
|               | PreLD  | 90.3 | 158  | 172  | -1.8 | 0.96<br>(0.53-1.76) | 0.9  |
|               | LD     | 93.4 | 274  | 292  | 1.3  | 1.3<br>(0.76-2.23)  | 0.34 |
|               | PostLD | 95.8 | 144  | 150  | 3.7  | 2.05<br>(0.87-4.81) | 0.1  |
| West Lothian  | 2019   | 94.7 | 1754 | 1852 | NA   | NA                  | NA   |
|               | PreLD  | 93.9 | 342  | 363  | -0.8 | 0.91<br>(0.56-1.48) | 0.7  |
|               | LD     | 95.7 | 547  | 571  | 1    | 1.27<br>(0.81-2.01) | 0.3  |
|               | PostLD | 93.4 | 272  | 291  | -1.3 | 0.8<br>(0.48-1.33)  | 0.39 |
| Western Isles | 2019   | 95.4 | 188  | 197  | NA   | NA                  | NA   |
|               | PreLD  | 95.8 | 33   | 35   | 0.4  | 0.79<br>(0.16-3.82) | 0.77 |
|               | LD     | 94.6 | 56   | 59   | -0.8 | 1.18<br>(0.83-1.67) | 0.36 |
|               | PostLD | 95.4 | 23   | 24   | 0    | 0.78<br>(0.52-1.17) | 0.24 |

602

## 603 B Second dose 6in1

| HSCP                          | Time period | % uptake (within 4 weeks) | Number received | Number eligible | % point change from 2019 | OR compared to 2019 (95% CI) | p value |
|-------------------------------|-------------|---------------------------|-----------------|-----------------|--------------------------|------------------------------|---------|
| Aberdeen City                 | 2019        | 84.3                      | 1891            | 2244            | NA                       | NA                           | NA      |
|                               | PreLD       | 74.7                      | 358             | 459             | -9.6                     | 0.66<br>(0.52-0.85)          | <0.001  |
|                               | LD          | 81.9                      | 603             | 733             | -2.4                     | 0.87<br>(0.69-1.08)          | 0.2     |
|                               | PostLD      | 82                        | 281             | 344             | -2.3                     | 0.83<br>(0.62-1.12)          | 0.23    |
| Aberdeenshire                 | 2019        | 93.3                      | 2411            | 2584            | NA                       | NA                           | NA      |
|                               | PreLD       | 87.4                      | 470             | 530             | -5.9                     | 0.56<br>(0.41-0.77)          | <0.001  |
|                               | LD          | 92.9                      | 753             | 811             | -0.4                     | 0.93<br>(0.68-1.27)          | 0.65    |
|                               | PostLD      | 90.7                      | 365             | 404             | -2.6                     | 0.67<br>(0.47-0.97)          | 0.03    |
| Angus                         | 2019        | 82.7                      | 843             | 1019            | NA                       | NA                           | NA      |
|                               | PreLD       | 80                        | 188             | 223             | -2.7                     | 1.12<br>(0.75-1.67)          | 0.57    |
|                               | LD          | 87.6                      | 288             | 330             | 4.9                      | 1.43<br>(1-2.06)             | 0.05    |
|                               | PostLD      | 85.7                      | 136             | 160             | 3                        | 1.18<br>(0.74-1.88)          | 0.48    |
| Argyll and Bute               | 2019        | 81.7                      | 523             | 640             | NA                       | NA                           | NA      |
|                               | PreLD       | 84.4                      | 137             | 167             | 2.7                      | 1.02<br>(0.66-1.59)          | 0.92    |
|                               | LD          | 89.3                      | 214             | 240             | 7.6                      | 1.84<br>(1.17-2.9)           | 0.01    |
|                               | PostLD      | 83.8                      | 86              | 107             | 2.1                      | 0.92<br>(0.55-1.54)          | 0.74    |
| Clackmannanshire and Stirling | 2019        | 84.9                      | 1003            | 1182            | NA                       | NA                           | NA      |
|                               | PreLD       | 91.2                      | 231             | 259             | 6.3                      | (1.47<br>(0.96-2.25)         | 0.07    |
|                               | LD          | 92.8                      | 416             | 448             | 7.9                      | 2.32<br>(1.57-3.44)          | <0.001  |
|                               | PostLD      | 92.5                      | 173             | 188             | 7.6                      | 2.06<br>(1.19-3.57)          | 0.01    |
| Dumfries and Galloway         | 2019        | 82                        | 978             | 1193            | NA                       | NA                           | NA      |

|                     |        |      |      |      |      |                     |        |
|---------------------|--------|------|------|------|------|---------------------|--------|
|                     | PreLD  | 87.2 | 217  | 251  | 5.2  | 1.4<br>(0.95-2.07)  | 0.09   |
|                     | LD     | 89.5 | 363  | 409  | 7.5  | 1.73<br>(1.23-2.44) | <0.001 |
|                     | PostLD | 90.3 | 197  | 218  | 8.3  | 2.06<br>(1.28-3.31) | <0.001 |
| Dundee City         | 2019   | 79.6 | 1133 | 1423 | NA   | NA                  | NA     |
|                     | PreLD  | 75.9 | 226  | 284  | -3.7 | 1<br>(0.73-1.37)    | 0.99   |
|                     | LD     | 83.2 | 385  | 463  | 3.6  | 1.26<br>(0.96-1.66) | 0.1    |
|                     | PostLD | 83.9 | 199  | 238  | 4.3  | 1.31<br>(0.91-1.88) | 0.15   |
| East Ayrshire       | 2019   | 89   | 1052 | 1182 | NA   | NA                  | NA     |
|                     | PreLD  | 88.2 | 214  | 242  | -0.8 | 0.94<br>(0.61-1.46) | 0.8    |
|                     | LD     | 92.7 | 400  | 429  | 3.7  | 1.7<br>(1.12-2.59)  | 0.01   |
|                     | PostLD | 92.8 | 187  | 202  | 3.8  | 1.54<br>(0.88-2.69) | 0.13   |
| East Dunbartonshire | 2019   | 88.9 | 893  | 1005 | NA   | NA                  | NA     |
|                     | PreLD  | 96.4 | 186  | 196  | 7.5  | 2.33<br>(1.2-4.54)  | 0.01   |
|                     | LD     | 97   | 331  | 342  | 8.1  | 3.77<br>(2.01-7.1)  | <0.001 |
|                     | PostLD | 95.4 | 168  | 176  | 6.5  | 2.63<br>(1.26-5.5)  | 0.01   |
| East Lothian        | 2019   | 83.8 | 932  | 1112 | NA   | NA                  | NA     |
|                     | PreLD  | 87.1 | 169  | 198  | 3.3  | 1.13<br>(0.74-1.72) | 0.59   |
|                     | LD     | 90.9 | 326  | 360  | 7.1  | 1.85<br>(1.26-2.73) | <0.001 |
|                     | PostLD | 88.8 | 152  | 170  | 5    | 1.63<br>(0.98-2.73) | 0.06   |
| East Renfrewshire   | 2019   | 91.6 | 834  | 910  | NA   | NA                  | NA     |
|                     | PreLD  | 95.8 | 171  | 181  | 4.2  | 1.56<br>(0.79-3.07) | 0.2    |
|                     | LD     | 96.6 | 282  | 292  | 5    | 2.57<br>(1.31-5.04) | 0.01   |
|                     | PostLD | 96.3 | 156  | 162  | 4.7  | 2.37<br>(1.01-5.54) | 0.05   |

|              |        |      |      |      |      |                     |        |
|--------------|--------|------|------|------|------|---------------------|--------|
| Edinburgh    | 2019   | 81   | 3650 | 4505 | NA   | NA                  | NA     |
|              | PreLD  | 83.3 | 814  | 980  | 2.3  | 1.15<br>(0.96-1.38) | 0.14   |
|              | LD     | 87.7 | 1387 | 1582 | 6.7  | 1.67<br>(1.41-1.97) | <0.001 |
|              | PostLD | 83.9 | 679  | 810  | 2.9  | 1.21<br>(0.99-1.48) | 0.06   |
| Falkirk      | 2019   | 82.3 | 1243 | 1511 | NA   | NA                  | NA     |
|              | PreLD  | 82.8 | 260  | 315  | 0.5  | 1.02<br>(0.74-1.4)  | 0.91   |
|              | LD     | 91.7 | 473  | 517  | 9.4  | 2.32<br>(1.66-3.24) | <0.001 |
|              | PostLD | 92.1 | 231  | 250  | 9.8  | 2.62<br>(1.61-4.26) | <0.001 |
| Fife         | 2019   | 86.8 | 2966 | 3418 | NA   | NA                  | NA     |
|              | PreLD  | 83.7 | 627  | 732  | -3.1 | 0.91<br>(0.72-1.14) | 0.42   |
|              | LD     | 89.6 | 1030 | 1151 | 2.8  | 1.3<br>(1.05-1.6)   | 0.02   |
|              | PostLD | 90.2 | 509  | 562  | 3.4  | 1.46<br>(1.08-1.98) | 0.01   |
| Glasgow City | 2019   | 80.2 | 5196 | 6480 | NA   | NA                  | NA     |
|              | PreLD  | 83.2 | 1116 | 1347 | 3    | 1.19<br>(1.02-1.39) | 0.02   |
|              | LD     | 89.1 | 1894 | 2125 | 8.9  | 2.03<br>(1.74-2.35) | <0.001 |
|              | PostLD | 90.8 | 971  | 1069 | 10.6 | 2.45<br>(1.97-3.04) | <0.001 |
| Highland     | 2019   | 80.3 | 1600 | 1992 | NA   | NA                  | NA     |
|              | PreLD  | 75.5 | 332  | 419  | -4.8 | 0.93<br>(0.72-1.21) | 0.61   |
|              | LD     | 84.8 | 565  | 669  | 4.5  | 1.33<br>(1.05-1.69) | 0.02   |
|              | PostLD | 80.1 | 258  | 321  | -0.2 | 1<br>(0.75-1.35)    | 0.98   |
| Inverclyde   | 2019   | 91.9 | 575  | 626  | NA   | NA                  | NA     |
|              | PreLD  | 91.2 | 142  | 156  | -0.7 | 0.9<br>(0.48-1.67)  | 0.74   |
|              | LD     | 91.6 | 207  | 226  | -0.3 | 0.97<br>(0.56-1.68) | 0.9    |
|              | PostLD | 88.7 | 91   | 101  | -3.2 | 0.81                | 0.56   |

|                   |        |      |      |      |      |                      |        |
|-------------------|--------|------|------|------|------|----------------------|--------|
|                   |        |      |      |      |      | (0.4-1.65)           |        |
| Midlothian        | 2019   | 83.3 | 935  | 1122 | NA   | NA                   | NA     |
|                   | PreLD  | 84.1 | 181  | 218  | 0.8  | 0.98<br>(0.66-1.44)  | 0.91   |
|                   | LD     | 86.9 | 308  | 354  | 3.6  | 1.34<br>(0.95-1.9)   | 0.1    |
|                   | PostLD | 93.9 | 172  | 183  | 10.6 | 3.13<br>(1.67-5.87)  | <0.001 |
| Moray             | 2019   | 90.4 | 751  | 831  | NA   | NA                   | NA     |
|                   | PreLD  | 88.8 | 171  | 197  | -1.6 | 0.7<br>(0.44-1.12)   | 0.14   |
|                   | LD     | 90.2 | 279  | 311  | -0.2 | 0.93<br>(0.6-1.43)   | 0.74   |
|                   | PostLD | 94.2 | 146  | 155  | 3.8  | 1.73<br>(0.85-.52)   | 0.13   |
| North Ayrshire    | 2019   | 85.8 | 952  | 1109 | NA   | NA                   | NA     |
|                   | PreLD  | 82.7 | 221  | 257  | -3.1 | 1.01<br>(0.69-1.5)   | 0.95   |
|                   | LD     | 88.7 | 354  | 399  | 2.9  | 1.3<br>(0.91-1.85)   | 0.15   |
|                   | PostLD | 85.4 | 171  | 201  | -0.4 | 0.94<br>(0.62-1.44)  | 0.77   |
| North Lanarkshire | 2019   | 87.2 | 3090 | 3542 | NA   | NA                   | NA     |
|                   | PreLD  | 85.6 | 623  | 724  | -1.6 | 0.9<br>(0.72-1.14)   | 0.39   |
|                   | LD     | 91.3 | 1037 | 1136 | 4.1  | 1.53<br>(1.22-1.93)  | <0.001 |
|                   | PostLD | 89.3 | 508  | 566  | 2.1  | 1.28<br>(0.96-1.71)  | 0.09   |
| Orkney Islands    | 2019   | 85   | 175  | 206  | NA   | NA                   | NA     |
|                   | PreLD  | 93.2 | 29   | 31   | 8.2  | 2.57<br>(0.58-11.32) | 0.21   |
|                   | LD     | 87   | 53   | 61   | 2    | 1.88<br>(1.39-2.53)  | <0.001 |
|                   | PostLD | 97   | 26   | 27   | 12   | 1.48<br>(1.02-2.14)  | 0.04   |
| Perth and Kinross | 2019   | 81.8 | 1016 | 1242 | NA   | NA                   | NA     |
|                   | PreLD  | 76.9 | 211  | 264  | -4.9 | 0.89<br>(0.63-1.24)  | 0.48   |
|                   | LD     | 85.3 | 382  | 446  | 3.5  | 1.33<br>(0.98-1.79)  | 0.07   |



|                     |        |      |      |      |       |                     |        |
|---------------------|--------|------|------|------|-------|---------------------|--------|
|                     | PostLD | 85.5 | 171  | 200  | 3.7   | 1.31<br>(0.86-1.99) | 0.2    |
| Renfrewshire        | 2019   | 88.2 | 1508 | 1710 | NA    | NA                  | NA     |
|                     | PreLD  | 90.8 | 334  | 366  | 2.6   | 1.4<br>(0.95-2.07)  | 0.09   |
|                     | LD     | 95   | 593  | 623  | 6.8   | 2.65<br>(1.78-3.93) | <0.001 |
|                     | PostLD | 92.2 | 246  | 269  | 4     | 1.43<br>(0.91-2.25) | 0.12   |
| Scottish Borders    | 2019   | 85.6 | 740  | 864  | NA    | NA                  | NA     |
|                     | PreLD  | 83.3 | 178  | 212  | -2.3  | 0.88<br>(0.58-1.33) | 0.53   |
|                     | LD     | 89.6 | 283  | 315  | 4     | 1.48<br>(0.98-2.24) | 0.06   |
|                     | PostLD | 86.8 | 134  | 153  | 1.2   | 1.18<br>(0.7-1.98)  | 0.53   |
| Shetland Islands    | 2019   | 89.5 | 197  | 220  | NA    | NA                  | NA     |
|                     | PreLD  | 83.8 | 21   | 25   | -5.8  | 0.61<br>(0.19-1.94) | 0.41   |
|                     | LD     | 82.8 | 56   | 68   | -6.7  | 1.88<br>(1.39-2.53) | <0.001 |
|                     | PostLD | 77.3 | 25   | 32   | -12.2 | 1.48<br>(1.02-2.14) | 0.04   |
| South Ayrshire      | 2019   | 92.4 | 830  | 898  | NA    | NA                  | NA     |
|                     | PreLD  | 89.5 | 165  | 184  | -2.9  | 0.71<br>(0.42-1.22) | 0.21   |
|                     | LD     | 95.5 | 277  | 290  | 3.1   | 1.75<br>(0.95-3.21) | 0.07   |
|                     | PostLD | 92.3 | 121  | 132  | -0.1  | 0.9<br>(0.46-1.75)  | 0.76   |
| South Lanarkshire   | 2019   | 88.2 | 2821 | 3199 | NA    | NA                  | NA     |
|                     | PreLD  | 85.9 | 590  | 666  | -2.3  | 1.04<br>(0.8-1.35)  | 0.77   |
|                     | LD     | 91.8 | 1014 | 1104 | 3.6   | 1.51<br>(1.19-1.92) | <0.001 |
|                     | PostLD | 90.8 | 489  | 539  | 2.6   | 1.31<br>(0.96-1.79) | 0.09   |
| West Dunbartonshire | 2019   | 80.2 | 693  | 864  | NA    | NA                  | NA     |
|                     | PreLD  | 85.5 | 131  | 160  | 5.3   | 1.11<br>(0.72-1.72) | 0.63   |
|                     | LD     | 88.7 | 263  | 296  | 8.5   | 1.97                | <0.001 |

|               |        |      |      |      |      |                     |        |
|---------------|--------|------|------|------|------|---------------------|--------|
|               |        |      |      |      |      | (1.32-2.93)         |        |
|               | PostLD | 85   | 128  | 149  | 4.8  | 1.5<br>(0.92-2.46)  | 0.1    |
| West Lothian  | 2019   | 82.7 | 1525 | 1845 | NA   | NA                  | NA     |
|               | PreLD  | 85.3 | 318  | 368  | 2.6  | 1.33<br>(0.97-1.84) | 0.08   |
|               | LD     | 89.6 | 510  | 567  | 6.9  | 1.88<br>(1.39-2.53) | <0.001 |
|               | PostLD | 87.5 | 254  | 290  | 4.8  | 1.48<br>(1.02-2.14) | 0.04   |
| Western Isles | 2019   | 89.2 | 173  | 194  | NA   | NA                  | NA     |
|               | PreLD  | 83.3 | 30   | 36   | -5.9 | 0.61<br>(0.23-1.63) | 0.32   |
|               | LD     | 93.5 | 60   | 64   | 4.3  | 0.87<br>(0.69-1.08) | 0.2    |
|               | PostLD | 88.9 | 24   | 28   | -0.3 | 0.83<br>(0.62-1.12) | 0.23   |

604

605 C Third dose 6in1

| HSCP          | Time period | % uptake<br>(within 4<br>weeks) | Number<br>received | Number<br>eligible | % point change from<br>2019 | OR compared to 2019<br>(95% CI) | p value |
|---------------|-------------|---------------------------------|--------------------|--------------------|-----------------------------|---------------------------------|---------|
| Aberdeen City | 2019        | 72.4                            | 1609               | 2222               | NA                          | NA                              | NA      |
|               | PreLD       | 65.8                            | 345                | 520                | -6.6                        | 0.75<br>(0.61-0.92)             | 0.01    |
|               | LD          | 62.3                            | 450                | 719                | -10.1                       | 0.64<br>(0.53-0.76)             | <0.001  |
|               | PostLD      | 75                              | 252                | 336                | 2.6                         | 1.14<br>(0.88-1.49)             | 0.32    |
| Aberdeenshire | 2019        | 86.8                            | 2266               | 2611               | NA                          | NA                              | NA      |
|               | PreLD       | 82                              | 446                | 536                | -4.8                        | 0.75<br>(0.59-0.97)             | 0.03    |
|               | LD          | 86.1                            | 721                | 838                | -0.7                        | 0.94<br>(0.75-1.18)             | 0.58    |
|               | PostLD      | 80.8                            | 336                | 416                | -6                          | 0.64<br>(0.49-0.84)             | <0.001  |

|                               |        |      |     |      |      |                     |        |
|-------------------------------|--------|------|-----|------|------|---------------------|--------|
| Angus                         | 2019   | 71.2 | 738 | 1036 | NA   | NA                  | NA     |
|                               | PreLD  | 76   | 159 | 214  | 4.8  | 1.17<br>(0.84-1.63) | 0.37   |
|                               | LD     | 75.9 | 261 | 345  | 4.7  | 1.25<br>(0.95-1.66) | 0.11   |
|                               | PostLD | 79   | 121 | 154  | 7.8  | 1.48<br>(0.98-2.23) | 0.06   |
| Argyll and Bute               | 2019   | 69.3 | 443 | 639  | NA   | NA                  | NA     |
|                               | PreLD  | 72.9 | 120 | 170  | 3.6  | 1.06<br>(0.73-1.54) | 0.75   |
|                               | LD     | 78.2 | 178 | 230  | 8.9  | 1.51<br>(1.07-2.15) | 0.02   |
|                               | PostLD | 78.8 | 94  | 118  | 9.5  | 1.73<br>(1.07-2.8)  | 0.02   |
| Clackmannanshire and Stirling | 2019   | 72.3 | 860 | 1189 | NA   | NA                  | NA     |
|                               | PreLD  | 74.4 | 217 | 282  | 2.1  | 1.28<br>(0.94-1.73) | 0.12   |
|                               | LD     | 89   | 384 | 432  | 16.7 | 3.06<br>(2.21-4.24) | <0.001 |
|                               | PostLD | 86.1 | 167 | 193  | 13.8 | 2.46<br>(1.59-3.79) | <0.001 |
| Dumfries and Galloway         | 2019   | 68.5 | 805 | 1175 | NA   | NA                  | NA     |
|                               | PreLD  | 66.4 | 187 | 280  | -2.1 | 0.92<br>(0.7-1.22)  | 0.58   |
|                               | LD     | 85.5 | 339 | 401  | 17   | 2.51<br>(1.87-3.38) | <0.001 |
|                               | PostLD | 81   | 177 | 221  | 12.5 | 1.85<br>(1.3-2.63)  | <0.001 |
| Dundee City                   | 2019   | 65.9 | 933 | 1416 | NA   | NA                  | NA     |
|                               | PreLD  | 62   | 213 | 325  | -3.9 | 0.98<br>(0.76-1.27) | 0.9    |
|                               | LD     | 73.2 | 326 | 442  | 7.3  | 1.45<br>(1.15-1.85) | <0.001 |
|                               | PostLD | 72.5 | 170 | 235  | 6.6  | 1.35<br>(1-1.84)    | 0.05   |
| East Ayrshire                 | 2019   | 78.5 | 930 | 1184 | NA   | NA                  | NA     |
|                               | PreLD  | 78.4 | 204 | 260  | -0.1 | 0.99<br>(0.72-1.38) | 0.98   |
|                               | LD     | 84.9 | 357 | 420  | 6.4  | 1.55<br>(1.14-2.09) | <0.001 |
|                               | PostLD | 87   | 172 | 198  | 8.5  | 1.81                | 0.01   |

|                     |        |      |      |      |      |                     |        |
|---------------------|--------|------|------|------|------|---------------------|--------|
|                     |        |      |      |      |      | (1.17-2.79)         |        |
| East Dunbartonshire | 2019   | 79.3 | 808  | 1019 | NA   | NA                  | NA     |
|                     | PreLD  | 86.3 | 180  | 213  | 7    | 1.42<br>(0.95-2.13) | 0.08   |
|                     | LD     | 93.2 | 304  | 326  | 13.9 | 3.61<br>(2.28-5.71) | <0.001 |
|                     | PostLD | 92.4 | 152  | 165  | 13.1 | 3.05<br>(1.7-5.49)  | <0.001 |
| East Lothian        | 2019   | 70.2 | 786  | 1119 | NA   | NA                  | NA     |
|                     | PreLD  | 67.9 | 153  | 225  | -2.3 | 0.9<br>(0.66-1.23)  | 0.5    |
|                     | LD     | 86.9 | 298  | 345  | 16.7 | 2.69<br>(1.92-3.75) | <0.001 |
|                     | PostLD | 82.9 | 140  | 167  | 12.7 | 2.2<br>(1.43-3.38)  | <0.001 |
| East Renfrewshire   | 2019   | 85.3 | 795  | 932  | NA   | NA                  | NA     |
|                     | PreLD  | 84.5 | 145  | 167  | -0.8 | 1.14<br>(0.7-1.84)  | 0.61   |
|                     | LD     | 95.6 | 294  | 310  | 10.3 | 3.17<br>(1.85-5.41) | <0.001 |
|                     | PostLD | 89.6 | 134  | 147  | 4.3  | 1.78<br>(0.98-3.23) | 0.06   |
| Edinburgh           | 2019   | 68   | 3058 | 4494 | NA   | NA                  | NA     |
|                     | PreLD  | 68.1 | 721  | 1043 | 0.1  | 1.05<br>(0.91-1.22) | 0.5    |
|                     | LD     | 80.7 | 1253 | 1545 | 12.7 | 2.02<br>(1.75-2.32) | <0.001 |
|                     | PostLD | 75.8 | 583  | 771  | 7.8  | 1.46<br>(1.22-1.74) | <0.001 |
| Falkirk             | 2019   | 65.5 | 969  | 1480 | NA   | NA                  | NA     |
|                     | PreLD  | 73.7 | 241  | 337  | 8.2  | 1.32<br>(1.02-1.72) | 0.03   |
|                     | LD     | 82   | 412  | 503  | 16.5 | 2.39<br>(1.86-3.07) | <0.001 |
|                     | PostLD | 83.3 | 212  | 254  | 17.8 | 2.66<br>(1.88-3.77) | <0.001 |
| Fife                | 2019   | 75   | 2571 | 3426 | NA   | NA                  | NA     |
|                     | PreLD  | 73.5 | 556  | 768  | -1.5 | 0.87<br>(0.73-1.04) | 0.13   |
|                     | LD     | 81.7 | 940  | 1151 | 6.7  | 1.48<br>(1.25-1.75) | <0.001 |

|                |        |      |      |      |       |                     |        |
|----------------|--------|------|------|------|-------|---------------------|--------|
|                | PostLD | 86.4 | 484  | 561  | 11.4  | 2.09<br>(1.62-2.69) | <0.001 |
| Glasgow City   | 2019   | 68.7 | 4454 | 6484 | NA    | NA                  | NA     |
|                | PreLD  | 72.9 | 1011 | 1424 | 4.2   | 1.12<br>(0.98-1.27) | 0.09   |
|                | LD     | 83.9 | 1796 | 2140 | 15.2  | 2.38<br>(2.1-2.7)   | <0.001 |
|                | PostLD | 84.4 | 842  | 998  | 15.7  | 2.46<br>(2.06-2.94) | <0.001 |
| Highland       | 2019   | 67.5 | 1340 | 1984 | NA    | NA                  | NA     |
|                | PreLD  | 61.4 | 279  | 461  | -6.1  | 0.74<br>(0.6-0.91)  | <0.001 |
|                | LD     | 73.1 | 480  | 653  | 5.6   | 1.33<br>(1.09-1.62) | <0.001 |
|                | PostLD | 63.9 | 199  | 311  | -3.6  | 0.85<br>(0.67-1.1)  | 0.22   |
| Inverclyde     | 2019   | 84.8 | 542  | 639  | NA    | NA                  | NA     |
|                | PreLD  | 78.6 | 121  | 151  | -6.2  | 0.72<br>(0.46-1.14) | 0.16   |
|                | LD     | 87.4 | 206  | 238  | 2.6   | 1.15<br>(0.75-1.77) | 0.52   |
|                | PostLD | 84.6 | 91   | 105  | -0.2  | 1.16<br>(0.64-2.13) | 0.62   |
| Midlothian     | 2019   | 69   | 791  | 1146 | NA    | NA                  | NA     |
|                | PreLD  | 66.6 | 151  | 222  | -2.4  | 0.95<br>(0.7-1.3)   | 0.77   |
|                | LD     | 79.7 | 288  | 360  | 10.7  | 1.8<br>(1.35-2.39)  | <0.001 |
|                | PostLD | 82.4 | 143  | 173  | 13.4  | 2.14<br>(1.42-3.23) | <0.001 |
| Moray          | 2019   | 80.5 | 680  | 845  | NA    | NA                  | NA     |
|                | PreLD  | 66.2 | 129  | 188  | -14.3 | 0.53<br>(0.37-0.75) | <0.001 |
|                | LD     | 80.9 | 259  | 320  | 0.4   | 1.03<br>(0.74-1.43) | 0.86   |
|                | PostLD | 86.8 | 134  | 155  | 6.3   | 1.55<br>(0.95-2.53) | 0.08   |
| North Ayrshire | 2019   | 71.1 | 781  | 1099 | NA    | NA                  | NA     |
|                | PreLD  | 74.3 | 198  | 268  | 3.2   | 1.15<br>(0.85-1.56) | 0.36   |
|                | LD     | 80.2 | 334  | 417  | 9.1   | 1.55                | 0.08   |

|                   |        |      |      |      |       |                     |        |
|-------------------|--------|------|------|------|-------|---------------------|--------|
|                   |        |      |      |      |       | (0.95-2.53)         |        |
|                   | PostLD | 67   | 117  | 175  | -4.1  | 0.82<br>(0.58-1.15) | 0.26   |
| North Lanarkshire | 2019   | 74.5 | 2651 | 3558 | NA    | NA                  | NA     |
|                   | PreLD  | 77.7 | 579  | 758  | 3.2   | 1.11<br>(0.92-1.33) | 0.28   |
|                   | LD     | 83.6 | 959  | 1148 | 9.1   | 1.74<br>(1.46-2.06) | <0.001 |
|                   | PostLD | 77.8 | 404  | 517  | 3.3   | 1.22<br>(0.98-1.53) | 0.07   |
| Orkney Islands    | 2019   | 76   | 155  | 204  | NA    | NA                  | NA     |
|                   | PreLD  | 82.2 | 27   | 33   | 6.2   | 1.42<br>(0.56-3.65) | 0.46   |
|                   | LD     | 79.2 | 39   | 51   | 3.2   | 2.22<br>(1.76-2.79) | <0.001 |
|                   | PostLD | 94.4 | 28   | 29   | 18.5  | 1.74<br>(1.27-2.39) | <0.001 |
| Perth and Kinross | 2019   | 69.8 | 847  | 1213 | NA    | NA                  | NA     |
|                   | PreLD  | 57.3 | 204  | 313  | -12.5 | 0.81<br>(0.62-1.05) | 0.11   |
|                   | LD     | 75.7 | 317  | 415  | 5.9   | 1.4<br>(1.08-1.81)  | 0.01   |
|                   | PostLD | 74.8 | 166  | 219  | 5     | 1.35<br>(0.97-1.89) | 0.07   |
| Renfrewshire      | 2019   | 78.4 | 1342 | 1712 | NA    | NA                  | NA     |
|                   | PreLD  | 81.3 | 307  | 386  | 2.9   | 1.07<br>(0.82-1.41) | 0.62   |
|                   | LD     | 85.1 | 537  | 630  | 6.7   | 1.59<br>(1.24-2.04) | <0.001 |
|                   | PostLD | 84.5 | 228  | 271  | 6.1   | 1.46<br>(1.03-2.07) | 0.03   |
| Scottish Borders  | 2019   | 76.4 | 662  | 867  | NA    | NA                  | NA     |
|                   | PreLD  | 68.3 | 165  | 239  | -8.1  | 0.69<br>(0.5-0.95)  | 0.02   |
|                   | LD     | 83.3 | 250  | 303  | 6.9   | 1.46<br>(1.04-2.04) | 0.03   |
|                   | PostLD | 73.5 | 103  | 137  | -2.9  | 0.94<br>(0.62-1.43) | 0.76   |
| Shetland Islands  | 2019   | 77.2 | 169  | 219  | NA    | NA                  | NA     |
|                   | PreLD  | 87   | 27   | 31   | 9.8   | 2<br>(0.67-5.98)    | 0.22   |

|                     |        |      |      |      |       |                     |        |
|---------------------|--------|------|------|------|-------|---------------------|--------|
|                     | LD     | 85.2 | 56   | 65   | 8     | 2.22<br>(1.76-2.79) | <0.001 |
|                     | PostLD | 42.8 | 13   | 31   | -34.5 | 1.74<br>(1.27-2.39) | <0.001 |
| South Ayrshire      | 2019   | 82.1 | 760  | 926  | NA    | NA                  | NA     |
|                     | PreLD  | 79.6 | 149  | 180  | -2.5  | 1.05<br>(0.69-1.6)  | 0.82   |
|                     | LD     | 90.5 | 271  | 301  | 8.4   | 1.97<br>(1.31-2.98) | <0.001 |
|                     | PostLD | 85   | 103  | 122  | 2.9   | 1.18<br>(0.71-1.99) | 0.52   |
| South Lanarkshire   | 2019   | 76.6 | 2469 | 3225 | NA    | NA                  | NA     |
|                     | PreLD  | 75   | 587  | 745  | -1.6  | 1.14<br>(0.94-1.38) | 0.19   |
|                     | LD     | 85.1 | 893  | 1043 | 8.5   | 1.82<br>(1.51-2.21) | <0.001 |
|                     | PostLD | 80.6 | 438  | 545  | 4     | 1.25<br>(1-1.57)    | 0.05   |
| West Dunbartonshire | 2019   | 67.6 | 585  | 866  | NA    | NA                  | NA     |
|                     | PreLD  | 75.7 | 129  | 190  | 8.1   | 1.02<br>(0.73-1.42) | 0.93   |
|                     | LD     | 84.5 | 238  | 281  | 16.9  | 2.66<br>(1.86-3.79) | <0.001 |
|                     | PostLD | 78.8 | 116  | 147  | 11.2  | 1.8<br>(1.18-2.74)  | 0.01   |
| West Lothian        | 2019   | 67.2 | 1244 | 1850 | NA    | NA                  | NA     |
|                     | PreLD  | 73.7 | 266  | 382  | 6.5   | 1.12<br>(0.88-1.42) | 0.36   |
|                     | LD     | 82.1 | 487  | 594  | 14.9  | 2.22<br>(1.76-2.79) | <0.001 |
|                     | PostLD | 77.6 | 193  | 247  | 10.4  | 1.74<br>(1.27-2.39) | <0.001 |
| Western Isles       | 2019   | 74.1 | 149  | 201  | NA    | NA                  | NA     |
|                     | PreLD  | 60.8 | 18   | 30   | -13.3 | 0.52<br>(0.24-1.16) | 0.11   |
|                     | LD     | 91.6 | 62   | 69   | 17.5  | 0.64<br>(0.53-0.76) | <0.001 |
|                     | PostLD | 76.7 | 23   | 30   | 2.6   | 1.14<br>(0.88-1.49) | 0.32   |

606 **D First dose MMR**

| HSCP                          | Time period | % uptake (within 4 weeks) | Number received | Number eligible | % point change from 2019 | OR compared to 2019 (94% CI) | p value |
|-------------------------------|-------------|---------------------------|-----------------|-----------------|--------------------------|------------------------------|---------|
| Aberdeen City                 | 2019        | 55.1                      | 1235            | 2243            | NA                       | NA                           | NA      |
|                               | PreLD       | 53.4                      | 259             | 501             | -1.7                     | 0.87<br>(0.72-1.06)          | 0.17    |
|                               | LD          | 69.3                      | 553             | 795             | 14.2                     | 1.87<br>(1.57-2.22)          | <0.001  |
|                               | PostLD      | 71.5                      | 285             | 399             | 16.4                     | 2.04<br>(1.62-2.57)          | <0.001  |
| Aberdeenshire                 | 2019        | 49.4                      | 1383            | 2798            | NA                       | NA                           | NA      |
|                               | PreLD       | 48                        | 254             | 554             | -1.4                     | 0.87<br>(0.72-1.04)          | 0.12    |
|                               | LD          | 56.8                      | 536             | 936             | 7.4                      | 1.37<br>(1.18-1.59)          | <0.001  |
|                               | PostLD      | 48.9                      | 221             | 448             | -0.5                     | 1<br>(0.82-1.22)             | 0.97    |
| Angus                         | 2019        | 69.3                      | 681             | 982             | NA                       | NA                           | NA      |
|                               | PreLD       | 72.1                      | 182             | 250             | 2.8                      | 1.18<br>(0.87-1.61)          | 0.29    |
|                               | LD          | 85.6                      | 311             | 365             | 16.3                     | 2.55<br>(1.85-3.5)           | <0.001  |
|                               | PostLD      | 80                        | 129             | 162             | 10.7                     | 1.73<br>(1.15-2.59)          | 0.01    |
| Argyll and Bute               | 2019        | 64.8                      | 440             | 679             | NA                       | NA                           | NA      |
|                               | PreLD       | 74                        | 112             | 157             | 9.2                      | 1.35<br>(0.92-1.98)          | 0.12    |
|                               | LD          | 78.6                      | 178             | 226             | 13.8                     | 2.01<br>(1.41-2.87)          | <0.001  |
|                               | PostLD      | 72.9                      | 74              | 102             | 8.1                      | 1.44<br>(0.9-2.28)           | 0.13    |
| Clackmannanshire and Stirling | 2019        | 70.8                      | 902             | 1274            | NA                       | NA                           | NA      |
|                               | PreLD       | 73.4                      | 179             | 242             | 2.6                      | 1.17<br>(0.86-1.6)           | 0.32    |
|                               | LD          | 83.5                      | 377             | 449             | 12.7                     | 2.16<br>(1.63-2.86)          | <0.001  |
|                               | PostLD      | 86.8                      | 178             | 205             | 16                       | 2.72<br>(1.78-4.15)          | <0.001  |
| Dumfries and Galloway         | 2019        | 72                        | 907             | 1259            | NA                       | NA                           | NA      |
|                               | PreLD       | 71.7                      | 198             | 272             | -0.3                     | 1.04<br>(0.77-1.39)          | 0.8     |



|                     |        |      |      |      |      |                     |        |
|---------------------|--------|------|------|------|------|---------------------|--------|
|                     | LD     | 84   | 338  | 401  | 12   | 2.08<br>(1.55-2.8)  | <0.001 |
|                     | PostLD | 79.7 | 178  | 224  | 7.7  | 1.5<br>(1.06-2.12)  | 0.02   |
| Dundee City         | 2019   | 60.5 | 857  | 1416 | NA   | NA                  | NA     |
|                     | PreLD  | 60.3 | 188  | 293  | -0.2 | 1.17<br>(0.9-1.52)  | 0.24   |
|                     | LD     | 76   | 388  | 510  | 15.5 | 2.07<br>(1.65-2.61) | <0.001 |
|                     | PostLD | 74.5 | 198  | 265  | 14   | 1.93<br>(1.43-2.59) | <0.001 |
| East Ayrshire       | 2019   | 58.9 | 703  | 1194 | NA   | NA                  | NA     |
|                     | PreLD  | 56.3 | 166  | 260  | -2.6 | 1.23<br>(0.93-1.63) | 0.14   |
|                     | LD     | 69   | 306  | 441  | 10.1 | 1.58<br>(1.25-2)    | <0.001 |
|                     | PostLD | 70.4 | 154  | 218  | 11.5 | 1.68<br>(1.23-2.3)  | <0.001 |
| East Dunbartonshire | 2019   | 75.8 | 803  | 1060 | NA   | NA                  | NA     |
|                     | PreLD  | 79.3 | 188  | 240  | 3.5  | 1.16<br>(0.83-1.62) | 0.4    |
|                     | LD     | 91.1 | 303  | 335  | 15.3 | 3.03<br>(2.05-4.48) | <0.001 |
|                     | PostLD | 86.8 | 162  | 187  | 11   | 2.07<br>(1.33-3.23) | <0.001 |
| East Lothian        | 2019   | 71.2 | 800  | 1124 | NA   | NA                  | NA     |
|                     | PreLD  | 70.7 | 166  | 233  | -0.5 | 1<br>(0.73-1.37)    | 0.98   |
|                     | LD     | 87.3 | 352  | 405  | 16.1 | 2.69<br>(1.96-3.69) | <0.001 |
|                     | PostLD | 80.2 | 157  | 198  | 9    | 1.55<br>(1.07-2.24) | 0.02   |
| East Renfrewshire   | 2019   | 74.6 | 745  | 998  | NA   | NA                  | NA     |
|                     | PreLD  | 76.6 | 157  | 199  | 2    | 1.27<br>(0.88-1.84) | 0.21   |
|                     | LD     | 84.8 | 280  | 327  | 10.2 | 2.02<br>(1.44-2.84) | <0.001 |
|                     | PostLD | 85.2 | 136  | 159  | 10.6 | 2.01<br>(1.26-3.19) | <0.001 |
| Edinburgh           | 2019   | 68.1 | 3140 | 4611 | NA   | NA                  | NA     |
|                     | PreLD  | 68.1 | 709  | 1037 | 0    | 1.01                | 0.86   |

|              |        |      |      |      |       |                     |        |
|--------------|--------|------|------|------|-------|---------------------|--------|
|              |        |      |      |      |       | (0.88-1.17)         |        |
|              | LD     | 80.1 | 1315 | 1642 | 12    | 1.88<br>(1.64-2.16) | <0.001 |
|              | PostLD | 73.1 | 562  | 766  | 5     | 1.29<br>(1.09-1.53) | <0.001 |
| Falkirk      | 2019   | 68.8 | 1052 | 1530 | NA    | NA                  | NA     |
|              | PreLD  | 67.8 | 245  | 343  | -1    | 1.14<br>(0.88-1.47) | 0.33   |
|              | LD     | 85.4 | 450  | 530  | 16.6  | 2.56<br>(1.97-3.32) | <0.001 |
|              | PostLD | 80.8 | 216  | 265  | 12    | 2<br>(1.44-2.78)    | <0.001 |
| Fife         | 2019   | 67   | 2379 | 3553 | NA    | NA                  | NA     |
|              | PreLD  | 70.9 | 535  | 762  | 3.9   | 1.16<br>(0.98-1.38) | 0.08   |
|              | LD     | 70.5 | 856  | 1214 | 3.5   | 1.18<br>(1.02-1.36) | 0.02   |
|              | PostLD | 68   | 414  | 608  | 1     | 1.05<br>(0.88-1.27) | 0.58   |
| Glasgow City | 2019   | 67   | 4209 | 6281 | NA    | NA                  | NA     |
|              | PreLD  | 76.4 | 1079 | 1413 | 9.4   | 1.59<br>(1.39-1.82) | <0.001 |
|              | LD     | 80.6 | 1942 | 2404 | 13.6  | 2.07<br>(1.85-2.32) | <0.001 |
|              | PostLD | 80.4 | 921  | 1146 | 13.4  | 2.02<br>(1.73-2.35) | <0.001 |
| Highland     | 2019   | 56.7 | 1156 | 2039 | NA    | NA                  | NA     |
|              | PreLD  | 55.1 | 254  | 434  | -1.6  | 1.08<br>(0.87-1.33) | 0.48   |
|              | LD     | 68.5 | 511  | 746  | 11.8  | 1.66<br>(1.39-1.98) | <0.001 |
|              | PostLD | 58   | 216  | 371  | 1.3   | 1.06<br>(0.85-1.33) | 0.58   |
| Inverclyde   | 2019   | 75.7 | 535  | 707  | NA    | NA                  | NA     |
|              | PreLD  | 62.6 | 100  | 151  | -13.1 | 0.63<br>(0.43-0.92) | 0.02   |
|              | LD     | 82   | 161  | 195  | 6.3   | 1.52<br>(1.01-2.29) | 0.04   |
|              | PostLD | 82.1 | 87   | 106  | 6.4   | 1.47<br>(0.87-2.49) | 0.15   |
| Midlothian   | 2019   | 65.3 | 733  | 1122 | NA    | NA                  | NA     |

|                   |        |      |      |      |      |                     |        |
|-------------------|--------|------|------|------|------|---------------------|--------|
|                   | PreLD  | 64.8 | 177  | 258  | -0.5 | 1.16<br>(0.87-1.55) | 0.32   |
|                   | LD     | 82.8 | 349  | 421  | 17.5 | 2.57<br>(1.94-3.41) | <0.001 |
|                   | PostLD | 83.5 | 163  | 196  | 18.2 | 2.62<br>(1.77-3.89) | <0.001 |
| Moray             | 2019   | 54.1 | 447  | 827  | NA   | NA                  | NA     |
|                   | PreLD  | 62.7 | 111  | 181  | 8.6  | 1.35<br>(0.97-1.87) | 0.08   |
|                   | LD     | 86.4 | 264  | 308  | 32.3 | 5.1<br>(3.6-7.22)   | <0.001 |
|                   | PostLD | 86.3 | 130  | 150  | 32.2 | 5.53<br>(3.38-9.02) | <0.001 |
| North Ayrshire    | 2019   | 56.5 | 648  | 1146 | NA   | NA                  | NA     |
|                   | PreLD  | 58.6 | 144  | 253  | 2.1  | 1.02<br>(0.77-1.34) | 0.91   |
|                   | LD     | 73   | 272  | 373  | 16.5 | 2.07<br>(1.6-2.67)  | <0.001 |
|                   | PostLD | 61.2 | 144  | 243  | 4.7  | 1.12<br>(0.84-1.48) | 0.44   |
| North Lanarkshire | 2019   | 69.8 | 2448 | 3509 | NA   | NA                  | NA     |
|                   | PreLD  | 68.3 | 566  | 791  | -1.5 | 1.09<br>(0.92-1.29) | 0.32   |
|                   | LD     | 83.4 | 1078 | 1286 | 13.6 | 2.25<br>(1.9-2.65)  | <0.001 |
|                   | PostLD | 78.4 | 488  | 624  | 8.6  | 1.56<br>(1.27-1.91) | <0.001 |
| Orkney Islands    | 2019   | 53.9 | 111  | 206  | NA   | NA                  | NA     |
|                   | PreLD  | 55.7 | 19   | 33   | 1.8  | 1.16<br>(0.55-2.44) | 0.69   |
|                   | LD     | 73.2 | 50   | 67   | 19.3 | 2.8<br>(2.23-3.53)  | <0.001 |
|                   | PostLD | 71.6 | 29   | 41   | 17.7 | 1.89<br>(1.42-2.51) | <0.001 |
| Perth and Kinross | 2019   | 66.4 | 855  | 1287 | NA   | NA                  | NA     |
|                   | PreLD  | 65.6 | 177  | 263  | -0.8 | 1.04<br>(0.78-1.38) | 0.79   |
|                   | LD     | 78.2 | 351  | 448  | 11.8 | 1.83<br>(1.42-2.35) | <0.001 |
|                   | PostLD | 72.7 | 156  | 217  | 6.3  | 1.29<br>(0.94-1.78) | 0.11   |
| Renfrewshire      | 2019   | 69.1 | 1210 | 1750 | NA   | NA                  | NA     |

|                     |        |      |      |      |      |                     |        |
|---------------------|--------|------|------|------|------|---------------------|--------|
|                     |        |      |      |      |      |                     |        |
|                     | PreLD  | 73.2 | 301  | 400  | 4.1  | 1.36<br>(1.06-1.74) | 0.02   |
|                     | LD     | 83.5 | 507  | 607  | 14.4 | 2.26<br>(1.78-2.87) | <0.001 |
|                     | PostLD | 74.9 | 216  | 287  | 5.8  | 1.36<br>(1.02-1.81) | 0.04   |
| Scottish Borders    | 2019   | 67.1 | 658  | 981  | NA   | NA                  | NA     |
|                     | PreLD  | 66.9 | 134  | 204  | -0.2 | 0.94<br>(0.68-1.29) | 0.7    |
|                     | LD     | 78.7 | 250  | 317  | 11.6 | 1.83<br>(1.36-2.47) | <0.001 |
|                     | PostLD | 70.8 | 114  | 154  | 3.7  | 1.4<br>(0.95-2.05)  | 0.09   |
| Shetland Islands    | 2019   | 29.8 | 68   | 228  | NA   | NA                  | NA     |
|                     | PreLD  | 54.1 | 19   | 35   | 24.3 | 2.79<br>(1.36-5.76) | 0.01   |
|                     | LD     | 39.5 | 27   | 69   | 9.7  | 2.8<br>(2.23-3.53)  | <0.001 |
|                     | PostLD | 24.5 | 12   | 41   | -5.3 | 1.89<br>(1.42-2.51) | <0.001 |
| South Ayrshire      | 2019   | 61.5 | 583  | 948  | NA   | NA                  | NA     |
|                     | PreLD  | 70.8 | 128  | 182  | 9.3  | 1.48<br>(1.05-2.09) | 0.02   |
|                     | LD     | 81.4 | 274  | 333  | 19.9 | 2.91<br>(2.13-3.97) | <0.001 |
|                     | PostLD | 78.6 | 132  | 169  | 17.1 | 2.23<br>(1.52-3.29) | <0.001 |
| South Lanarkshire   | 2019   | 70.1 | 2271 | 3241 | NA   | NA                  | NA     |
|                     | PreLD  | 71.3 | 548  | 731  | 1.2  | 1.28<br>(1.06-1.54) | 0.01   |
|                     | LD     | 81.8 | 960  | 1171 | 11.7 | 1.94<br>(1.64-2.3)  | <0.001 |
|                     | PostLD | 81   | 460  | 567  | 10.9 | 1.84<br>(1.47-2.3)  | <0.001 |
| West Dunbartonshire | 2019   | 65.8 | 573  | 871  | NA   | NA                  | NA     |
|                     | PreLD  | 75.6 | 136  | 185  | 9.8  | 1.44<br>(1.01-2.06) | 0.04   |
|                     | LD     | 79.4 | 249  | 311  | 13.6 | 2.09<br>(1.53-2.85) | <0.001 |
|                     | PostLD | 78   | 128  | 164  | 12.2 | 1.85<br>(1.25-2.75) | <0.001 |

|               |        |      |      |      |      |                     |        |
|---------------|--------|------|------|------|------|---------------------|--------|
| West Lothian  | 2019   | 66.7 | 1238 | 1857 | NA   | NA                  | NA     |
|               | PreLD  | 70.1 | 301  | 418  | 3.4  | 1.29<br>(1.02-1.63) | 0.04   |
|               | LD     | 84.6 | 583  | 687  | 17.9 | 2.8<br>(2.23-3.53)  | <0.001 |
|               | PostLD | 79.1 | 257  | 325  | 12.4 | 1.89<br>(1.42-2.51) | <0.001 |
| Western Isles | 2019   | 52.6 | 113  | 215  | NA   | NA                  | NA     |
|               | PreLD  | 64.6 | 24   | 38   | 12   | 1.55<br>(0.76-3.15) | 0.23   |
|               | LD     | 77.1 | 55   | 72   | 24.5 | 1.87<br>(1.57-2.22) | <0.001 |
|               | PostLD | 63.2 | 23   | 35   | 10.6 | 2.04<br>(1.62-2.57) | <0.001 |

607

608

609 **E Second dose MMR**

610

| HSCP                             | Time period | % uptake<br>(within 4<br>weeks) | Number<br>received | Number<br>eligible | % point change from<br>2019 | OR compared to 2019<br>(95% CI) | p value |
|----------------------------------|-------------|---------------------------------|--------------------|--------------------|-----------------------------|---------------------------------|---------|
| Angus                            | 2019        | 43.8                            | 498                | 1137               | NA                          | NA                              | NA      |
|                                  | PreLD       | 54.7                            | 147                | 275                | 10.9                        | 1.47<br>(1.13-1.92)             | <0.001  |
|                                  | LD          | 74.1                            | 266                | 367                | 30.3                        | 3.38<br>(2.61-4.37)             | <0.001  |
|                                  | PostLD      | 62.7                            | 118                | 189                | 18.9                        | 2.13<br>(1.55-2.93)             | <0.001  |
| Argyll and Bute                  | 2019        | 57.3                            | 436                | 761                | NA                          | NA                              | NA      |
|                                  | PreLD       | 55.8                            | 92                 | 166                | -1.5                        | 0.93<br>(0.66-1.3)              | 0.66    |
|                                  | LD          | 61.2                            | 169                | 279                | 3.9                         | 1.15<br>(0.87-1.51)             | 0.34    |
|                                  | PostLD      | 60.8                            | 65                 | 108                | 3.5                         | 1.13<br>(0.75-1.7)              | 0.57    |
| Clackmannanshire and<br>Stirling | 2019        | 52.3                            | 770                | 1471               | NA                          | NA                              | NA      |
|                                  | PreLD       | 54.7                            | 193                | 320                | 2.4                         | 1.38<br>(1.08-1.77)             | 0.01    |

|                       |        |      |     |      |       |                     |        |
|-----------------------|--------|------|-----|------|-------|---------------------|--------|
|                       | LD     | 68.3 | 341 | 504  | 16    | 1.9<br>(1.54-2.36)  | <0.001 |
|                       | PostLD | 60.5 | 144 | 237  | 8.2   | 1.41<br>(1.07-1.87) | 0.02   |
| Dumfries and Galloway | 2019   | 63.2 | 871 | 1379 | NA    | NA                  | NA     |
|                       | PreLD  | 60.6 | 199 | 314  | -2.6  | 1.01<br>(0.78-1.3)  | 0.94   |
|                       | LD     | 71   | 308 | 437  | 7.8   | 1.39<br>(1.1-1.76)  | 0.01   |
|                       | PostLD | 72.5 | 187 | 257  | 9.3   | 1.56<br>(1.16-2.09) | <0.001 |
|                       | 2019   | 32.9 | 485 | 1476 | NA    | NA                  | NA     |
| Dundee City           | PreLD  | 39.4 | 143 | 346  | 6.5   | 1.44<br>(1.13-1.83) | <0.001 |
|                       | LD     | 58.9 | 309 | 523  | 26    | 2.95<br>(2.4-3.62)  | <0.001 |
|                       | PostLD | 52.8 | 137 | 256  | 19.9  | 2.35<br>(1.8-3.08)  | <0.001 |
|                       | 2019   | 39.7 | 522 | 1316 | NA    | NA                  | NA     |
| East Ayrshire         | PreLD  | 26.6 | 100 | 304  | -13.1 | 0.75<br>(0.57-0.97) | 0.03   |
|                       | LD     | 43.8 | 192 | 445  | 4.1   | 1.15<br>(0.93-1.44) | 0.2    |
|                       | PostLD | 43.5 | 86  | 198  | 3.8   | 1.17<br>(0.86-1.58) | 0.31   |
|                       | 2019   | 56.4 | 674 | 1196 | NA    | NA                  | NA     |
| East Dunbartonshire   | PreLD  | 63.6 | 197 | 300  | 7.2   | 1.48<br>(1.14-1.93) | <0.001 |
|                       | LD     | 82.6 | 370 | 447  | 26.2  | 3.72<br>(2.84-4.88) | <0.001 |
|                       | PostLD | 85.1 | 188 | 223  | 28.7  | 4.16<br>(2.85-6.07) | <0.001 |
|                       | 2019   | 60   | 762 | 1271 | NA    | NA                  | NA     |
| East Lothian          | PreLD  | 56.2 | 161 | 271  | -3.8  | 0.98<br>(0.75-1.28) | 0.87   |
|                       | LD     | 78.5 | 315 | 401  | 18.5  | 2.45<br>(1.88-3.18) | <0.001 |
|                       | PostLD | 59.1 | 112 | 184  | -0.9  | 1.04<br>(0.76-1.43) | 0.81   |
|                       | 2019   | 62.5 | 731 | 1169 | NA    | NA                  | NA     |
| East Renfrewshire     | PreLD  | 63.3 | 176 | 258  | 0.8   | 1.29                | 0.09   |

|              |        |      |      |      |       |                     |        |
|--------------|--------|------|------|------|-------|---------------------|--------|
|              |        |      |      |      |       | (0.96-1.71)         |        |
|              | LD     | 83.5 | 309  | 369  | 21    | 3.09<br>(2.28-4.17) | <0.001 |
|              | PostLD | 84.1 | 156  | 186  | 21.6  | 3.12<br>(2.07-4.69) | <0.001 |
| Edinburgh    | 2019   | 56.3 | 2727 | 4846 | NA    | NA                  | NA     |
|              | PreLD  | 60.5 | 660  | 1117 | 4.2   | 1.12<br>(0.98-1.28) | 0.09   |
|              | LD     | 65.6 | 1103 | 1679 | 9.3   | 1.49<br>(1.33-1.67) | <0.001 |
|              | PostLD | 61.3 | 492  | 806  | 5     | 1.22<br>(1.05-1.42) | 0.01   |
| Falkirk      | 2019   | 49   | 793  | 1619 | NA    | NA                  | NA     |
|              | PreLD  | 47.6 | 194  | 366  | -1.4  | 1.17<br>(0.94-1.47) | 0.16   |
|              | LD     | 62   | 353  | 579  | 13    | 1.63<br>(1.34-1.97) | <0.001 |
|              | PostLD | 62.8 | 178  | 284  | 13.8  | 1.75<br>(1.35-2.27) | <0.001 |
| Fife         | 2019   | 47   | 1799 | 3826 | NA    | NA                  | NA     |
|              | PreLD  | 50.4 | 446  | 906  | 3.4   | 1.09<br>(0.95-1.26) | 0.23   |
|              | LD     | 52.2 | 673  | 1285 | 5.2   | 1.24<br>(1.09-1.41) | <0.001 |
|              | PostLD | 44.7 | 257  | 573  | -2.3  | 0.92<br>(0.77-1.09) | 0.33   |
| Glasgow City | 2019   | 50.9 | 3262 | 6411 | NA    | NA                  | NA     |
|              | PreLD  | 61.8 | 960  | 1543 | 10.9  | 1.59<br>(1.42-1.78) | <0.001 |
|              | LD     | 70.8 | 1682 | 2378 | 19.9  | 2.33<br>(2.11-2.58) | <0.001 |
|              | PostLD | 72.6 | 782  | 1077 | 21.7  | 2.56<br>(2.22-2.95) | <0.001 |
| Highland     | 2019   | 50.7 | 1144 | 2257 | NA    | NA                  | NA     |
|              | PreLD  | 31.8 | 223  | 516  | -18.9 | 0.74<br>(0.61-0.9)  | <0.001 |
|              | LD     | 58.4 | 474  | 803  | 7.7   | 1.4<br>(1.19-1.65)  | <0.001 |
|              | PostLD | 52.3 | 192  | 356  | 1.6   | 1.14<br>(0.91-1.43) | 0.26   |
| Inverclyde   | 2019   | 61.9 | 445  | 719  | NA    | NA                  | NA     |

|                   |        |      |      |      |      |                     |        |
|-------------------|--------|------|------|------|------|---------------------|--------|
|                   | PreLD  | 63.2 | 111  | 177  | 1.3  | 1.04<br>(0.74-1.45) | 0.84   |
|                   | LD     | 71.3 | 153  | 214  | 9.4  | 1.54<br>(1.11-2.15) | 0.01   |
|                   | PostLD | 66.4 | 91   | 128  | 4.5  | 1.51<br>(1-2.28)    | 0.05   |
| Midlothian        | 2019   | 60.2 | 736  | 1223 | NA   | NA                  | NA     |
|                   | PreLD  | 56.8 | 168  | 293  | -3.4 | 0.89<br>(0.69-1.15) | 0.37   |
|                   | LD     | 75.8 | 299  | 405  | 15.6 | 1.87<br>(1.45-2.4)  | <0.001 |
|                   | PostLD | 68   | 137  | 204  | 7.8  | 1.35<br>(0.99-1.85) | 0.06   |
| North Ayrshire    | 2019   | 39.4 | 526  | 1334 | NA   | NA                  | NA     |
|                   | PreLD  | 35.4 | 100  | 280  | -4   | 0.85<br>(0.65-1.12) | 0.25   |
|                   | LD     | 47.7 | 205  | 427  | 8.3  | 1.42<br>(1.14-1.77) | <0.001 |
|                   | PostLD | 42.7 | 94   | 224  | 3.3  | 1.11<br>(0.83-1.48) | 0.47   |
| North Lanarkshire | 2019   | 53   | 1986 | 3749 | NA   | NA                  | NA     |
|                   | PreLD  | 53.1 | 508  | 845  | 0.1  | 1.34<br>(1.15-1.56) | <0.001 |
|                   | LD     | 70.7 | 888  | 1252 | 17.7 | 2.17<br>(1.89-2.49) | <0.001 |
|                   | PostLD | 66.7 | 436  | 656  | 13.7 | 1.76<br>(1.48-2.09) | <0.001 |
| Orkney Islands    | 2019   | 37   | 71   | 192  | NA   | NA                  | NA     |
|                   | PreLD  | 50.6 | 16   | 33   | 13.6 | 1.6<br>(0.76-3.37)  | 0.21   |
|                   | LD     | 63.6 | 43   | 66   | 26.6 | 2.46<br>(2.02-2.99) | <0.001 |
|                   | PostLD | 77.3 | 24   | 31   | 40.3 | 1.6<br>(1.25-2.04)  | <0.001 |
| Perth and Kinross | 2019   | 45.5 | 654  | 1436 | NA   | NA                  | NA     |
|                   | PreLD  | 51.5 | 190  | 356  | 6    | 1.37<br>(1.08-1.73) | 0.01   |
|                   | LD     | 63.2 | 284  | 465  | 17.7 | 1.88<br>(1.52-2.32) | <0.001 |
|                   | PostLD | 59.1 | 121  | 203  | 13.6 | 1.76<br>(1.31-2.38) | <0.001 |
| Renfrewshire      | 2019   | 57.5 | 1064 | 1852 | NA   | NA                  | NA     |



|                     |        |      |      |      |      |                     |        |
|---------------------|--------|------|------|------|------|---------------------|--------|
|                     | PreLD  | 60.9 | 252  | 408  | 3.4  | 1.2<br>(0.96-1.49)  | 0.11   |
|                     | LD     | 70.6 | 445  | 627  | 13.1 | 1.81<br>(1.49-2.2)  | <0.001 |
|                     | PostLD | 68.8 | 215  | 310  | 11.3 | 1.68<br>(1.29-2.17) | <0.001 |
| Scottish Borders    | 2019   | 55.5 | 616  | 1110 | NA   | NA                  | NA     |
|                     | PreLD  | 51.9 | 122  | 224  | -3.6 | 0.96<br>(0.72-1.28) | 0.78   |
|                     | LD     | 64.6 | 218  | 335  | 9.1  | 1.49<br>(1.16-1.93) | <0.001 |
|                     | PostLD | 59.1 | 111  | 189  | 3.6  | 1.14<br>(0.83-1.56) | 0.41   |
| Shetland Islands    | 2019   | 24.5 | 68   | 278  | NA   | NA                  | NA     |
|                     | PreLD  | 38   | 16   | 42   | 13.5 | 1.9<br>(0.96-3.75)  | 0.06   |
|                     | LD     | 19   | 16   | 70   | -5.5 | 2.46<br>(2.02-2.99) | <0.001 |
|                     | PostLD | 19.9 | 9    | 44   | -4.6 | 1.6<br>(1.25-2.04)  | <0.001 |
| South Ayrshire      | 2019   | 42.6 | 447  | 1050 | NA   | NA                  | NA     |
|                     | PreLD  | 37.3 | 100  | 244  | -5.3 | 0.94<br>(0.71-1.24) | 0.65   |
|                     | LD     | 54.6 | 187  | 354  | 12   | 1.51<br>(1.19-1.92) | <0.001 |
|                     | PostLD | 56.4 | 94   | 166  | 13.8 | 1.76<br>(1.27-2.45) | <0.001 |
| South Lanarkshire   | 2019   | 53.3 | 1839 | 3452 | NA   | NA                  | NA     |
|                     | PreLD  | 52   | 453  | 798  | -1.3 | 1.15<br>(0.99-1.35) | 0.07   |
|                     | LD     | 67.7 | 844  | 1247 | 14.4 | 1.84<br>(1.6-2.1)   | <0.001 |
|                     | PostLD | 64.5 | 364  | 563  | 11.2 | 1.6<br>(1.33-1.93)  | <0.001 |
| West Dunbartonshire | 2019   | 53   | 529  | 998  | NA   | NA                  | NA     |
|                     | PreLD  | 62   | 125  | 200  | 9    | 1.48<br>(1.08-2.02) | 0.01   |
|                     | LD     | 68.4 | 203  | 294  | 15.4 | 1.98<br>(1.5-2.61)  | <0.001 |
|                     | PostLD | 71   | 111  | 152  | 18   | 2.4<br>(1.64-3.51)  | <0.001 |

|               |        |      |      |      |      |                     |        |
|---------------|--------|------|------|------|------|---------------------|--------|
| West Lothian  | 2019   | 59.3 | 1238 | 2089 | NA   | NA                  | NA     |
|               | PreLD  | 59.3 | 291  | 493  | 0    | 0.99<br>(0.81-1.21) | 0.9    |
|               | LD     | 79   | 576  | 737  | 19.7 | 2.46<br>(2.02-2.99) | <0.001 |
|               | PostLD | 69.9 | 239  | 342  | 10.6 | 1.6<br>(1.25-2.04)  | <0.001 |
| Western Isles | 2019   | 45.6 | 104  | 228  | NA   | NA                  | NA     |
|               | PreLD  | 41.4 | 20   | 48   | -4.2 | 0.85<br>(0.45-1.6)  | 0.62   |
|               | LD     | 47.8 | 43   | 89   | 2.1  | 3.38<br>(2.61-4.37) | <0.001 |
|               | PostLD | 64.1 | 27   | 42   | 18.5 | 2.13<br>(1.55-2.93) | <0.001 |

611

612 Supplementary Table S3

| Immunisation | Deprivation quintile | Time period | % received within 4 weeks<br>(Number received/total eligible) | % point change<br>from 2019 | OR (95%CI) for uptake compared to 2019 | p-value |
|--------------|----------------------|-------------|---------------------------------------------------------------|-----------------------------|----------------------------------------|---------|
| First 6in1   | 1 - most deprived    | 2019        | 91.9<br>(11025/11996)                                         | NA                          | NA                                     | NA      |
|              | 1 - most deprived    | PreLD       | 91.5<br>(2383/2580)                                           | -0.4                        | 1.1 (0.9-1.3)                          | 0.44    |
|              | 1 - most deprived    | LD          | 93.9<br>(3815/4067)                                           | 2                           | 1.3 (1.2-1.5)                          | <0.001  |
|              | 1 - most deprived    | PostLD      | 94<br>(1906/2026)                                             | 2.1                         | 1.4 (1.2-1.7)                          | <0.001  |
|              | 2                    | 2019        | 93.1<br>(9740/10461)                                          | NA                          | NA                                     | NA      |
|              | 2                    | PreLD       | 91.6<br>(2119/2289)                                           | -1.5                        | 0.9 (0.8-1.1)                          | 0.36    |
|              | 2                    | LD          | 95.1<br>(3311/3484)                                           | 2                           | 1.4 (1.2-1.7)                          | <0.001  |
|              | 2                    | PostLD      | 93.9<br>(1641/1746)                                           | 0.8                         | 1.2 (0.9-1.4)                          | 0.18    |
|              | 3                    | 2019        | 93.7<br>(8457/9030)                                           | NA                          | NA                                     | NA      |
|              | 3                    | PreLD       | 93.1<br>(1814/1931)                                           | -0.6                        | 1.1 (0.9-1.3)                          | 0.64    |
|              | 3                    | LD          | 95.2<br>(3070/3224)                                           | 1.5                         | 1.4 (1.1-1.6)                          | <0.001  |
|              | 3                    | PostLD      | 95<br>(1468/1546)                                             | 1.3                         | 1.3 (1-1.6)                            | 0.05    |
|              | 4                    | 2019        | 95.6<br>(9804/10251)                                          | NA                          | NA                                     | NA      |
|              | 4                    | PreLD       | 95.3<br>(2038/2142)                                           | -0.3                        | 0.9 (0.7-1.1)                          | 0.31    |
|              | 4                    | LD          | 95.9<br>(3328/3470)                                           | 0.3                         | 1.1 (0.9-1.3)                          | 0.5     |
|              | 4                    | PostLD      | 94.4<br>(1677/1776)                                           | -1.2                        | 0.8 (0.6-1)                            | 0.02    |
|              | 5 - least deprived   | 2019        | 96.3<br>(8442/8769)                                           | NA                          | NA                                     | NA      |
|              | 5 - least deprived   | PreLD       | 95.7<br>(1724/1794)                                           | -0.6                        | 1(0.7-1.3)                             | 0.73    |
|              | 5 - least deprived   | LD          | 96.7<br>(2759/2853)                                           | 0.4                         | 1.1 (0.9-1.4)                          | 0.28    |
|              | 5 - least deprived   | PostLD      | 96.3<br>(1373/1427)                                           | 0                           | 1 (0.7-1.3)                            | 0.92    |
| Second 6in1  | 1 - most deprived    | 2019        | 79.8<br>(9633/12078)                                          | NA                          | NA                                     | NA      |

|                   |                    |        |                      |      |               |        |
|-------------------|--------------------|--------|----------------------|------|---------------|--------|
|                   | 1 - most deprived  | PreLD  | 78<br>(1984/2492)    | -1.8 | 1(0.9-1.1)    | 0.87   |
|                   | 1 - most deprived  | LD     | 86.3<br>(3533/4096)  | 6.5  | 1.6 (1.4-1.8) | <0.001 |
|                   | 1 - most deprived  | PostLD | 86.3<br>(1737/2013)  | 6.5  | 1.6 (1.4-1.8) | <0.001 |
|                   | 2                  | 2019   | 82.9<br>(8702/10499) | NA   | NA            | NA     |
|                   | 2                  | PreLD  | 83.4<br>(1880/2256)  | 0.5  | 1 (0.9-1.2)   | 0.61   |
|                   | 2                  | LD     | 88.4<br>(3133/3549)  | 5.5  | 1.6 (1.4-1.7) | <0.001 |
|                   | 2                  | PostLD | 86.9<br>(1509/1736)  | 4    | 1.4 (1.2-1.6) | <0.001 |
|                   | 3                  | 2019   | 85.2<br>(7711/9055)  | NA   | NA            | NA     |
|                   | 3                  | PreLD  | 85.4<br>(1675/1968)  | 0.2  | 1 (0.9-1.1)   | 0.96   |
|                   | 3                  | LD     | 89.5<br>(2851/3182)  | 4.3  | 1.5 (1.3-1.7) | <0.001 |
|                   | 3                  | PostLD | 89.4<br>(1387/1553)  | 4.2  | 1.5 (1.2-1.7) | <0.001 |
|                   | 4                  | 2019   | 88.5<br>(9157/10348) | NA   | NA            | NA     |
|                   | 4                  | PreLD  | 89<br>(1892/2121)    | 0.5  | 1.1 (0.9-1.3) | 0.35   |
|                   | 4                  | LD     | 92.2<br>(3221/3494)  | 3.7  | 1.5 (1.3-1.8) | <0.001 |
|                   | 4                  | PostLD | 90.2<br>(1540/1708)  | 1.7  | 1.2 (1-1.4)   | 0.04   |
|                   | 5 - least deprived | 2019   | 89.1<br>(7925/8890)  | NA   | NA            | NA     |
|                   | 5 - least deprived | PreLD  | 88.5<br>(1655/1837)  | -0.6 | 1.1 (0.9-1.3) | 0.23   |
|                   | 5 - least deprived | LD     | 93.3<br>(2668/2862)  | 4.2  | 1.7 (1.4-2)   | <0.001 |
|                   | 5 - least deprived | PostLD | 91.7<br>(1280/1395)  | 2.6  | 1.4 (1.1-1.7) | <0.001 |
| <b>Third 6in1</b> | 1 - most deprived  | 2019   | 66.2<br>(8007/12102) | NA   | NA            | NA     |
|                   | 1 - most deprived  | PreLD  | 65.5<br>(1727/2640)  | -0.7 | 1 (0.9-1.1)   | 0.46   |
|                   | 1 - most deprived  | LD     | 77.1<br>(3175/4114)  | 10.9 | 1.7 (1.6-1.9) | <0.001 |
|                   | 1 - most deprived  | PostLD | 74.9<br>(1427/1905)  | 8.7  | 1.5 (1.4-1.7) | <0.001 |
|                   | 2                  | 2019   | 70.3                 | NA   | NA            | NA     |

|                  |                    |        |                      |      |               |        |
|------------------|--------------------|--------|----------------------|------|---------------|--------|
|                  |                    |        | (7432/10569)         |      |               |        |
|                  | 2                  | PreLD  | 68.5<br>(1607/2331)  | -1.8 | 0.9 (0.9-1)   | 0.19   |
|                  | 2                  | LD     | 80<br>(2836/3550)    | 9.7  | 1.7 (1.5-1.8) | <0.001 |
|                  | 2                  | PostLD | 79.4<br>(1336/1683)  | 9.1  | 1.6 (1.4-1.8) | <0.001 |
|                  | 3                  | 2019   | 73.2<br>(6670/9107)  | NA   | NA            | NA     |
|                  | 3                  | PreLD  | 74.3<br>(1499/2045)  | 1.1  | 1 (0.9-1.1)   | 0.96   |
|                  | 3                  | LD     | 82<br>(2610/3178)    | 8.8  | 1.7 (1.5-1.9) | <0.001 |
|                  | 3                  | PostLD | 80.6<br>(1242/1542)  | 7.4  | 1.5 (1.3-1.7) | <0.001 |
|                  | 4                  | 2019   | 77.5<br>(7991/10307) | NA   | NA            | NA     |
|                  | 4                  | PreLD  | 77.5<br>(1799/2322)  | 0    | 1 (0.9-1.1)   | 0.96   |
|                  | 4                  | LD     | 86.2<br>(2911/3376)  | 8.7  | 1.8 (1.6-2)   | <0.001 |
|                  | 4                  | PostLD | 82.7<br>(1414/1709)  | 5.2  | 1.4 (1.2-1.6) | <0.001 |
|                  | 5 - least deprived | 2019   | 79.7<br>(7091/8893)  | NA   | NA            | NA     |
|                  | 5 - least deprived | PreLD  | 80.9<br>(1626/2032)  | 1.2  | 1 (0.9-1.1)   | 0.77   |
|                  | 5 - least deprived | LD     | 87<br>(2478/2841)    | 7.3  | 1.7 (1.5-2)   | <0.001 |
|                  | 5 - least deprived | PostLD | 85.2<br>(1121/1316)  | 5.5  | 1.5 (1.2-1.7) | <0.001 |
| <b>First MMR</b> | 1 - most deprived  | 2019   | 62.4<br>(7561/12121) | NA   | NA            | NA     |
|                  | 1 - most deprived  | PreLD  | 63.8<br>(1790/2721)  | 1.4  | 1.2 (1.1-1.3) | <0.001 |
|                  | 1 - most deprived  | LD     | 73.7<br>(3217/4358)  | 11.3 | 1.7 (1.6-1.8) | <0.001 |
|                  | 1 - most deprived  | PostLD | 70.6<br>(1529/2168)  | 8.2  | 1.4 (1.3-1.6) | <0.001 |
|                  | 2                  | 2019   | 63.8<br>(6720/10533) | NA   | NA            | NA     |
|                  | 2                  | PreLD  | 64.6<br>(1579/2378)  | 0.8  | 1.1 (1-1.2)   | 0.02   |
|                  | 2                  | LD     | 76.2<br>(2920/3825)  | 12.4 | 1.8 (1.7-2)   | <0.001 |
|                  | 2                  | PostLD | 72.9<br>(1325/1814)  | 9.1  | 1.5 (1.4-1.7) | <0.001 |

|                   |                    |        |                      |      |               |        |
|-------------------|--------------------|--------|----------------------|------|---------------|--------|
|                   | 3                  | 2019   | 64<br>(5936/9281)    | NA   | NA            | NA     |
|                   | 3                  | PreLD  | 68.1<br>(1376/2024)  | 4.1  | 1.2 (1.1-1.3) | <0.001 |
|                   | 3                  | LD     | 77.9<br>(2541/3251)  | 13.9 | 2 (1.8-2.2)   | <0.001 |
|                   | 3                  | PostLD | 74.6<br>(1260/1685)  | 10.6 | 1.7 (1.5-1.9) | <0.001 |
|                   | 4                  | 2019   | 66.5<br>(7102/10673) | NA   | NA            | NA     |
|                   | 4                  | PreLD  | 67.9<br>(1597/2292)  | 1.4  | 1.2 (1-1.3)   | <0.001 |
|                   | 4                  | LD     | 80.5<br>(3041/3776)  | 14   | 2.1 (1.9-2.3) | <0.001 |
|                   | 4                  | PostLD | 76.6<br>(1379/1801)  | 10.1 | 1.6 (1.5-1.8) | <0.001 |
|                   | 5 - least deprived | 2019   | 70.4<br>(6563/9325)  | NA   | NA            | NA     |
|                   | 5 - least deprived | PreLD  | 74<br>(1423/1927)    | 3.6  | 1.2 (1.1-1.3) | <0.001 |
|                   | 5 - least deprived | LD     | 85.1<br>(2730/3208)  | 14.7 | 2.4 (2.2-2.7) | <0.001 |
|                   | 5 - least deprived | PostLD | 79<br>(1238/1566)    | 8.6  | 1.6 (1.4-1.8) | <0.001 |
| <b>Second MMR</b> | 1 - most deprived  | 2019   | 46<br>(5785/12580)   | NA   | NA            | NA     |
|                   | 1 - most deprived  | PreLD  | 47.9<br>(1482/2935)  | 1.9  | 1.2 (1.1-1.3) | <0.001 |
|                   | 1 - most deprived  | LD     | 60.3<br>(2727/4538)  | 14.3 | 1.8 (1.7-1.9) | <0.001 |
|                   | 1 - most deprived  | PostLD | 57.7<br>(1236/2139)  | 11.7 | 1.6 (1.5-1.8) | <0.001 |
|                   | 2                  | 2019   | 50.2<br>(5169/10291) | NA   | NA            | NA     |
|                   | 2                  | PreLD  | 53.3<br>(1270/2300)  | 3.1  | 1.2 (1.1-1.3) | <0.001 |
|                   | 2                  | LD     | 63.7<br>(2276/3570)  | 13.5 | 1.7 (1.6-1.9) | <0.001 |
|                   | 2                  | PostLD | 60.3<br>(1001/1661)  | 10.1 | 1.5 (1.4-1.7) | <0.001 |
|                   | 3                  | 2019   | 51.7<br>(4701/9100)  | NA   | NA            | NA     |
|                   | 3                  | PreLD  | 51.8<br>(1127/2099)  | 0.1  | 1.2 (1.1-1.3) | <0.001 |
|                   | 3                  | LD     | 64.5<br>(1937/3007)  | 12.8 | 2 (1.8-2.2)   | <0.001 |
|                   | 3                  | PostLD | 62.3                 | 10.6 | 1.7 (1.5-1.9) | <0.001 |

|  |                    |        |                     |      |               |        |
|--|--------------------|--------|---------------------|------|---------------|--------|
|  |                    |        | (916/1470)          |      |               |        |
|  | 4                  | 2019   | 54.2<br>(4998/9219) | NA   | NA            | NA     |
|  | 4                  | PreLD  | 53.3<br>(1219/2135) | -0.9 | 1.1 (1-1.2)   | 0.02   |
|  | 4                  | LD     | 69.8<br>(2238/3211) | 15.6 | 1.9 (1.8-2.1) | <0.001 |
|  | 4                  | PostLD | 66.4<br>(1014/1528) | 12.2 | 1.7 (1.5-1.9) | <0.001 |
|  | 5 - least deprived | 2019   | 59.4<br>(5148/8670) | NA   | NA            | NA     |
|  | 5 - least deprived | PreLD  | 61.6<br>(1281/2010) | 2.2  | 1.2 (1.1-1.3) | <0.001 |
|  | 5 - least deprived | LD     | 75.6<br>(2105/2787) | 16.2 | 2.1 (1.9-2.3) | <0.001 |
|  | 5 - least deprived | PostLD | 72<br>(1000/1391)   | 12.6 | 1.7 (1.5-2)   | <0.001 |

613

614 **Supplementary Table S4**

| <b>Immunisation</b> | <b>Interaction term<br/>(baseline comparisons = 2019,<br/>SIMD 1)</b> | <b>ROR<br/>(exp of coeff of interaction model)</b> | <b>95% Confidence intervals</b> | <b><i>p</i> -value</b> |
|---------------------|-----------------------------------------------------------------------|----------------------------------------------------|---------------------------------|------------------------|
| <b>First 6in1</b>   | PreLD:SIMD2                                                           | 0.87                                               | (0.68-1.1)<br>ns                | 0.23                   |
|                     | LD:SIMD2                                                              | 1.06                                               | (0.85-1.33)<br>ns               | 0.59                   |
|                     | PostLD:SIMD2                                                          | 0.83                                               | (0.62-1.1)<br>ns                | 0.2                    |
|                     | PreLD:SIMD3                                                           | 0.99                                               | (0.76-1.28)<br>ns               | 0.92                   |
|                     | LD:SIMD3                                                              | 1.01                                               | (0.8-1.28)<br>ns                | 0.91                   |
|                     | PostLD:SIMD3                                                          | 0.91                                               | (0.67-1.25)<br>ns               | 0.56                   |
|                     | PreLD:SIMD4                                                           | 0.84                                               | (0.64-1.1)<br>ns                | 0.2                    |
|                     | LD:SIMD4                                                              | 0.8                                                | (0.63-1.02)<br>ns               | 0.07                   |
|                     | PostLD:SIMD4                                                          | 0.55                                               | (0.41-0.74)<br>sig              | <0.001                 |
|                     | PreLD:SIMD5                                                           | 0.9                                                | (0.66-1.22)<br>ns               | 0.48                   |
|                     | LD:SIMD5                                                              | 0.85                                               | (0.65-1.12)<br>ns               | 0.25                   |
|                     | PostLD:SIMD5                                                          | 0.7                                                | (0.5-1.01)<br>ns                | 0.05                   |
| <b>Second 6in1</b>  | PreLD:SIMD2                                                           | 1.04                                               | (0.89-1.23)<br>ns               | 0.62                   |
|                     | LD:SIMD2                                                              | 0.98                                               | (0.84-1.14)<br>ns               | 0.76                   |
|                     | PostLD:SIMD2                                                          | 0.86                                               | (0.7-1.05)<br>ns                | 0.14                   |
|                     | PreLD:SIMD3                                                           | 1.01                                               | (0.85-1.2)<br>ns                | 0.95                   |
|                     | LD:SIMD3                                                              | 0.94                                               | (0.8-1.11)<br>ns                | 0.47                   |
|                     | PostLD:SIMD3                                                          | 0.91                                               | (0.73-1.13)<br>ns               | 0.41                   |
|                     | PreLD:SIMD4                                                           | 1.08                                               | (0.9-1.3)<br>ns                 | 0.39                   |
|                     | LD:SIMD4                                                              | 0.96                                               | (0.81-1.14)<br>ns               | 0.67                   |
| PostLD:SIMD4        | 0.75                                                                  | (0.6-0.93)<br>sig                                  | 0.01                            |                        |



|                   |                  |             |                    |                  |
|-------------------|------------------|-------------|--------------------|------------------|
|                   | PreLD:SIMD5      | 1.12        | (0.92-1.36)<br>ns  | 0.27             |
|                   | LD:SIMD5         | 1.05        | (0.87-1.27)<br>ns  | 0.6              |
|                   | PostLD:SIMD5     | 0.85        | (0.67-1.08)<br>ns  | 0.18             |
| <b>Third 6in1</b> | PreLD:SIMD2      | 0.97        | (0.85-1.1)<br>ns   | 0.63             |
|                   | LD:SIMD2         | 0.97        | (0.86-1.1)<br>ns   | 0.62             |
|                   | PostLD:SIMD2     | 1.06        | (0.9-1.26)<br>ns   | 0.46             |
|                   | PreLD:SIMD3      | 1.04        | (0.9-1.19)<br>ns   | 0.61             |
|                   | LD:SIMD3         | 0.97        | (0.85-1.11)<br>ns  | 0.66             |
|                   | PostLD:SIMD3     | 0.99        | (0.83-1.18)<br>ns  | 0.92             |
|                   | PreLD:SIMD4      | 1.03        | (0.9-1.19)<br>ns   | 0.67             |
|                   | LD:SIMD4         | 1.05        | (0.92-1.2)<br>ns   | 0.49             |
|                   | PostLD:SIMD4     | 0.91        | (0.77-1.08)<br>ns  | 0.29             |
|                   | PreLD:SIMD5      | 1.05        | (0.91-1.22)<br>ns  | 0.51             |
|                   | LD:SIMD5         | 1           | (0.87-1.16)<br>ns  | 0.97             |
|                   | PostLD:SIMD5     | 0.96        | (0.79-1.16)<br>ns  | 0.66             |
|                   | <b>First MMR</b> | PreLD:SIMD2 | 0.97               | (0.85-1.1)<br>ns |
| LD:SIMD2          |                  | 1.08        | (0.96-1.21)<br>ns  | 0.21             |
| PostLD:SIMD2      |                  | 1.07        | (0.92-1.24)<br>ns  | 0.4              |
| PreLD:SIMD3       |                  | 1.03        | (0.9-1.18)<br>ns   | 0.65             |
| LD:SIMD3          |                  | 1.19        | (1.05-1.34)<br>sig | 0.01             |
| PostLD:SIMD3      |                  | 1.16        | (0.99-1.35)<br>ns  | 0.06             |
| PreLD:SIMD4       |                  | 1           | (0.87-1.14)<br>ns  | 0.96             |
| LD:SIMD4          |                  | 1.22        | (1.09-1.38)<br>sig | <0.001           |
| PostLD:SIMD4      |                  | 1.14        | (0.98-1.33)        | 0.1              |

|                   |              |      |             |        |
|-------------------|--------------|------|-------------|--------|
|                   |              |      | ns          |        |
|                   | PreLD:SIMD5  | 1.02 | (0.89-1.18) | 0.73   |
|                   | LD:SIMD5     | 1.41 | (1.24-1.61) | <0.001 |
|                   | PostLD:SIMD5 | 1.1  | (0.94-1.3)  | 0.25   |
| <b>Second MMR</b> | PreLD:SIMD2  | 1.02 | (0.9-1.15)  | 0.75   |
|                   | LD:SIMD2     | 0.99 | (0.89-1.09) | 0.78   |
|                   | PostLD:SIMD2 | 0.93 | (0.81-1.08) | 0.35   |
|                   | PreLD:SIMD3  | 0.91 | (0.8-1.03)  | 0.12   |
|                   | LD:SIMD3     | 0.96 | (0.86-1.07) | 0.44   |
|                   | PostLD:SIMD3 | 0.96 | (0.83-1.11) | 0.61   |
|                   | PreLD:SIMD4  | 0.94 | (0.83-1.06) | 0.31   |
|                   | LD:SIMD4     | 1.1  | (0.98-1.23) | 0.09   |
|                   | PostLD:SIMD4 | 1.04 | (0.9-1.2)   | 0.63   |
|                   | PreLD:SIMD5  | 1    | (0.88-1.14) | 0.96   |
|                   | LD:SIMD5     | 1.19 | (1.06-1.34) | <0.001 |
|                   | PostLD:SIMD5 | 1.09 | (0.93-1.27) | 0.29   |

615

616 **Supplementary table S5**

| Immunisation                                 | Time period | % uptake<br>(no received/no eligible) | % point change from<br>2019 | OR for uptake compared to 2019<br>(95% CI) | p-value |
|----------------------------------------------|-------------|---------------------------------------|-----------------------------|--------------------------------------------|---------|
| First6in1<br>(uptake by age 24weeks)         | 2019        | 97.9<br>(49542/50609)                 | NA                          | NA                                         | NA      |
|                                              | Pre LD      | 97.7<br>(10514/10761)                 | -0.2                        | 0.92<br>(0.8-1.06)                         | 0.22    |
|                                              | LD          | 97.6<br>(16724/17133)                 | -0.3                        | 0.88<br>(0.79-0.99)                        | 0.03    |
|                                              | Post LD     | 97.5<br>(8319/8531)                   | -0.4                        | 0.85<br>(0.73-0.98)                        | 0.03    |
| Second6in1<br>(uptake by age 28 weeks)       | 2019        | 96.7<br>(49291/50975)                 | NA                          | NA                                         | NA      |
|                                              | Pre LD      | 96.2<br>(10306/10698)                 | -0.5                        | 0.9<br>(0.8-1.01)                          | 0.06    |
|                                              | LD          | 96.6<br>(16639/17222)                 | -0.1                        | 0.98<br>(0.89-1.07)                        | 0.61    |
|                                              | Post LD     | 96.6<br>(8125/8412)                   | -0.1                        | 0.97<br>(0.85-1.1)                         | 0.61    |
| Third6in1<br>(uptake by age 32 weeks)        | 2019        | 94<br>(48029/51085)                   | NA                          | NA                                         | NA      |
|                                              | Pre LD      | 94.1<br>(10728/11394)                 | 0.1                         | 1.02<br>(0.94-1.12)                        | 0.59    |
|                                              | LD          | 94.8<br>(16199/17093)                 | 0.8                         | 1.15<br>(1.07-1.24)                        | <0.001  |
|                                              | Post LD     | 93.5<br>(7644/8172)                   | -0.5                        | 0.92<br>(0.84-1.01)                        | 0.09    |
| FirstMMR<br>(uptake by age 16 months)        | 2019        | 91.1<br>(47386/52015)                 | NA                          | NA                                         | NA      |
|                                              | Pre LD      | 91.3<br>(10389/11370)                 | 0.2                         | 1.03<br>(0.96-1.11)                        | 0.36    |
|                                              | LD          | 92.5<br>(17076/18463)                 | 1.4                         | 1.2<br>(1.13-1.28)                         | <0.001  |
|                                              | Post LD     | 91.6<br>(8285/9047)                   | 0.5                         | 1.06<br>(0.98-1.15)                        | 0.14    |
| SecondMMR<br>(uptake by age 3years 8 months) | 2019        | 80.8<br>(40376/49940)                 | NA                          | NA                                         | NA      |
|                                              | Pre LD      | 83.2<br>(9471/11495)                  | 2.4                         | 1.11<br>(1.05-1.17)                        | <0.001  |
|                                              | LD          | 86.1<br>(14763/17145)                 | 5.3                         | 1.47<br>(1.4-1.54)                         | <0.001  |
|                                              | Post LD     | 84.4<br>(6915/8196)                   | 3.6                         | 1.28<br>(1.2-1.36)                         | <0.001  |

617

618 **Supplementary table S6**

| <b>Immunisation</b>                    | <b>Time period</b> | <b>% uptake<br/>(no received/no eligible)</b> | <b>% point change from<br/>2019</b> | <b>OR for uptake compared to 2019<br/>(95% CI)</b> | <b>p-value</b> |
|----------------------------------------|--------------------|-----------------------------------------------|-------------------------------------|----------------------------------------------------|----------------|
| First6in1<br>(uptake by age 6 months)  | 2019               | 96.3<br>(571531/593700)                       | NA                                  | NA                                                 | NA             |
|                                        | Pre LD             | 95.8<br>(132779/138608)                       | 0.5                                 | 0.88 (0.86-0.91)                                   | <0.001         |
|                                        | LD                 | 95.8<br>(171660/179180)                       | 0.5                                 | 0.89 (0.86-0.91)                                   | <0.001         |
|                                        | Post LD            | 95.6<br>(90702/94862)                         | 0.7                                 | 0.85 (0.82 -0.87)                                  | <0.001         |
| Second6in1<br>(uptake by age 6 months) | 2019               | 93.9<br>(559382/595815)                       | NA                                  | NA                                                 | NA             |
|                                        | Pre LD             | 92.1<br>(131578/142833)                       | 1.8                                 | 0.76 (0.74-0.78)                                   | <0.001         |
|                                        | LD                 | 93.0<br>(164780/177221)                       | 0.9                                 | 0.86 (0.84-0.88)                                   | <0.001         |
|                                        | Post LD            | 92.5<br>(87818/94960)                         | 1.4                                 | 0.80 (0.78-0.82)                                   | <0.001         |
| Third6in1<br>(uptake by age 6 months)  | 2019               | 88.7<br>(529163/596355)                       | NA                                  | NA                                                 | NA             |
|                                        | Pre LD             | 85.6<br>(126284/147479)                       | 3.1                                 | 0.76 (0.74-0.77)                                   | <0.001         |
|                                        | LD                 | 86.6<br>(154912/178953)                       | 2.1                                 | 0.82 (0.81-0.83)                                   | <0.001         |
|                                        | Post LD            | 86.0<br>(79991/92990)                         | 2.7                                 | 0.78 (0.77-0.80)                                   | <0.001         |
| FirstMMR<br>(uptake by age 18 months)  | 2019               | 88.1<br>(541107/613923)                       | NA                                  | NA                                                 | NA             |
|                                        | Pre LD             | 86.7<br>(119885/138353)                       | 1.4                                 | 0.87(0.86-0.89)                                    | <0.001         |
|                                        | LD                 | 86.2<br>(173451/201164)                       | 1.9                                 | 0.84(0.83-0.85)                                    | <0.001         |

619

|  |         |                       |     |                 |        |
|--|---------|-----------------------|-----|-----------------|--------|
|  | Post LD | 86.2<br>(85939/99685) | 1.9 | 0.84(0.83-0.86) | <0.001 |
|--|---------|-----------------------|-----|-----------------|--------|

# Impact of COVID-19 and associated control measures on uptake of pre-school immunisations Analysis Plan

|                           |                                                                                                                                                                                                                                                                                                                                                                                                                                     |
|---------------------------|-------------------------------------------------------------------------------------------------------------------------------------------------------------------------------------------------------------------------------------------------------------------------------------------------------------------------------------------------------------------------------------------------------------------------------------|
| <b>Full Project Title</b> | Impact of COVID-19 and associated control measures on uptake of pre-school immunisations                                                                                                                                                                                                                                                                                                                                            |
| <b>Version Number</b>     | 1.0                                                                                                                                                                                                                                                                                                                                                                                                                                 |
| <b>Previous Versions</b>  | 0.2                                                                                                                                                                                                                                                                                                                                                                                                                                 |
| <b>Effective Date</b>     | 27/01/2021                                                                                                                                                                                                                                                                                                                                                                                                                          |
| <b>EAVE II Sub-study</b>  |                                                                                                                                                                                                                                                                                                                                                                                                                                     |
| <b>EAVE II Analyst(s)</b> | Rachel Mulholland (UofE)                                                                                                                                                                                                                                                                                                                                                                                                            |
| <b>Co-authors</b>         | <p>Scotland:</p> <p>Fiona McQuaid* (NHS Lothian, UofE)</p> <p>Claire Cameron (PHS)</p> <p>Cheryl Gibbon (PHS)</p> <p>Aziz Sheikh (UofE)</p> <p>Judith Tait (PHS)</p> <p>Steve Turner (RCPCH, University of Aberdeen)</p> <p>Jaime Villacampa Ortega (PHS)</p> <p>Rachael Wood (PHS, UofE)</p> <p>England:</p> <p>Helen Bedford (ICH, London)</p> <p>Elise Tessier (PHE)</p> <p>Yuma Sanpang Rai (PHE)</p> <p>Joanne White (PHE)</p> |

|                       |                  |
|-----------------------|------------------|
|                       | Partho Roy (PHE) |
| <b>Target journal</b> | BMJ              |

\*Corresponding author

## Contents

|       |                                            |     |
|-------|--------------------------------------------|-----|
| 1     | Introduction .....                         | 89  |
| 2     | Aims and objectives .....                  | 90  |
| 2.1   | Aims .....                                 | 90  |
| 2.2   | Objectives .....                           | 90  |
| 3     | Study Design .....                         | 91  |
| 3.1   | Study design .....                         | 91  |
| 3.2   | Setting .....                              | 91  |
| 3.3   | Population .....                           | 91  |
| 3.4   | Data sources .....                         | 91  |
| 3.5   | Inclusion/exclusion criteria .....         | 92  |
| 3.6   | Sample size calculation .....              | 92  |
| 4     | Data and data validation .....             | 93  |
| 4.1   | Data variables available .....             | 93  |
| 4.2   | Constructed variables .....                | 93  |
| 4.3   | Consistency and error checking .....       | 94  |
| 5     | Statistical analyses .....                 | 95  |
| 5.1   | Objective a: .....                         | 95  |
| 5.1.1 | Outcome .....                              | 95  |
| 5.1.2 | Exposures of interest .....                | 95  |
| 5.1.3 | Analytical techniques .....                | 96  |
| 5.1.4 | Potential confounders .....                | 98  |
| 5.1.5 | Potential effect modifiers .....           | 98  |
| 5.1.6 | Sub-group analysis .....                   | 98  |
| 5.1.7 | Corrections for multiple testing .....     | 98  |
| 5.1.8 | Sensitivity analysis .....                 | 98  |
| 5.1.9 | Other analysis .....                       | 98  |
| 5.2   | Missing data .....                         | 101 |
| 5.3   | Statistical software .....                 | 101 |
| 6     | Reporting results .....                    | 102 |
| 6.1   | Reporting guidelines and conventions ..... | 102 |
| 6.2   | Dissemination .....                        | 102 |
| 7     | References .....                           | 103 |



## 1 Introduction

The COVID-19 pandemic and resulting national lockdown has had a profound impact on the delivery of healthcare with the reconfiguration of acute services to support the anticipated influx of COVID-19 patients, cancellation of most elective activity and pausing of screening programmes (1). There is also evidence of a change in healthcare-seeking behaviour, for example, in Scotland the uptake of both emergency and elective hospital based care dropped substantially over the lockdown period (2). However, within child health, key routine services such as childhood immunisations and health visiting continued across Scotland and a campaign launched in April 2020 urged the public to remember “The NHS is open” (<https://www.gov.scot/news/urgent-medical-help-still-available>).

It has become increasingly apparent that younger children are at low risk of severe disease due to SARS-CoV-2 (3, 4) and may be less susceptible to infection by the virus (5). Yet the wider impact of the pandemic on children in terms of education, mental and physical health and safeguarding is not yet fully understood, though it is likely to be profound (6, 7). One particular area of concern early in the lockdown period was the potential effect on the uptake of routine childhood immunisations (8). Maintaining high population vaccine coverage is vital for both direct and indirect (via herd immunity) protection against non-COVID-19 infectious diseases. The current pre-school UK vaccination schedule is shown in table 1 along with the disease protected against.

Table 1 UK immunisation schedule 2020 (9). NA= not referenced/used in this manuscript.

| Age due                             | Diseases protected against                                                                                  | Vaccine given                        | Referred in this manuscript as: |
|-------------------------------------|-------------------------------------------------------------------------------------------------------------|--------------------------------------|---------------------------------|
| 8 weeks                             | Diphtheria, tetanus, pertussis (whooping cough), polio, Haemophilus influenzae type b (Hib) and hepatitis B | DTaP/IPV/Hib/HepB                    | First dose 6in1                 |
|                                     | Meningococcal group B (MenB)                                                                                | MenB                                 | NA                              |
|                                     | Rotavirus gastroenteritis                                                                                   | Rotavirus                            | NA                              |
| 12 weeks                            | Diphtheria, tetanus, pertussis, polio, Hib and hepatitis B                                                  | DTaP/IPV/Hib/HepB                    | Second dose 6in1                |
|                                     | Pneumococcal (13 serotypes)                                                                                 | Pneumococcal conjugate vaccine (PCV) | NA                              |
|                                     | Rotavirus gastroenteritis                                                                                   | Rotavirus                            | NA                              |
| 16 weeks                            | Diphtheria, tetanus, pertussis, polio, Hib and hepatitis B                                                  | DTaP/IPV/Hib/HepB                    | Third dose 6in1                 |
|                                     | Meningococcal group B (MenB)                                                                                | MenB                                 | NA                              |
| 1 year (after first birthday)       | Hib and Meningococcal group C (MenC)                                                                        | Hib/MenC                             | NA                              |
|                                     | Measles, mumps and rubella                                                                                  | MMR                                  | First dose MMR                  |
|                                     | Pneumococcal                                                                                                | PCV booster                          | NA                              |
| 3 years 4 months (or shortly after) | MenB                                                                                                        | MenB booster                         | NA                              |
|                                     | Diphtheria, tetanus, pertussis and polio                                                                    | dTaP/IPV                             | NA                              |
|                                     | Measles, mumps and rubella                                                                                  | MMR booster                          | Second dose MMR                 |
|                                     |                                                                                                             |                                      |                                 |

Initial reports suggested a fall in children receiving their scheduled vaccinations in the very early lockdown period (8). The aim of this paper is to use routinely collected and publicly available child health surveillance data in Scotland to describe the pattern of pre-school vaccine uptake during the pandemic period, with comparisons to 2019 data, by geographical area and socio-economic index. Of note, this paper refers to the first national lockdown which began on 23<sup>rd</sup> March 2020 with restrictions easing gradually from June 2020. The emergence in the UK of a new, highly transmissible, SARS-CoV-2 variant in late 2020 (10) has since prompted further control measures (essentially further lockdowns in Scotland and England with similar measure in Wales and Northern Ireland). Data continue to be collected on the impact on vaccine uptake and should be further evaluated when available, however this paper deals solely with the first national lockdown period.

We have contacted colleagues in child health surveillance from the other nations of the UK (England, Wales and Northern Ireland) to request access to equivalent data and should this become available, we will aim to describe the patterns of pre-school vaccine uptake as above for each of the nations which form the UK.

## 2 Aims and objectives

### 3 Aims

We aim to describe the impact of COVID-19 and associated control measures on the uptake of pre-school immunisations in Scotland, with potential to expand to other UK nations should additional data become available.

### 4 Objectives

We seek to:

- a. Describe the impact of the COVID-19 pandemic on the uptake of selected immunisations provided at each of the five immunisation contacts offered to pre-school children (table 1)
- b. Explore whether impact varied by: i) Health and social care partnership area of residence (HSCP- geographical areas closely related to local authority areas); and ii) socio-economic deprivation index
- c. Use these data to inform future strategies to promote maximal childhood vaccine uptake and reduce barriers, both in the context of a pandemic and more generally.

## 5 Study Design

### 6 Study design

Natural experiment, designed to take advantage of routinely collected data in the year prior to the COVID-19 pandemic and immediately before, during the first period of ‘lockdown’ (23 March-July 2020) imposed by the Scottish and UK and other devolved governments, and after the lockdown restrictions began to be eased (August- September 2020).

### 7 Setting

Scotland, UK with potential scope to extend to England, Wales and Northern Ireland.

### 8 Population

All children in Scotland (and if available; England, Wales and Northern Ireland) who become eligible (based on age), for routine immunisations as shown in Table 1 (specifically; first, second and third dose 6 in1, and first and second dose MMR) from January 2019 to September 2020.

### 9 Data sources

The Public Health Scotland (PHS) [COVID-19 wider impacts dashboard](https://scotland.shinyapps.io/phs-covid-wider-impact/) (<https://scotland.shinyapps.io/phs-covid-wider-impact/>), which presents data drawn from the Scottish Immunisation & Recall System (SIRS). SIRS is the dataset which records all information on children eligible for and receiving routine preschool immunisation in Scotland. These data are publicly available via the link above.

Equivalent data has been sought from England, Wales and Northern Ireland.

In England, data are extracted from ImmForm, a Public Health England website used to collect vaccine coverage data and provide vaccine ordering facilities. At present, due to data sharing agreements, it is likely that data from England will be analysed “in-house” by scientists at Public Health England, and results shared with the wider team. This analysis plan and the code used to analysis the Scottish data will be shared and similar methods applied within the constraints of which data are available (likely uptake of 6in1 vaccine at 6 months of age, and MMR at 12 and 18 months).

In Northern Ireland, data are collected by the Northern Ireland Child health System, the format and accessibility of which is being explored.

In Wales, data are provided by NHS Wales Informatics Service from the National Community Child Health Database (NCCHD). This is sourced from Community Child Health databases maintained by

local Child Health Office staff in Trusts throughout Wales based on regular returns from nurses and doctors who immunise or advise on immunisation.

## 10 Ethical approval

Ethical approval for this specific study was not required as we are using publicly available, anonymised, aggregated data.

## 11 Inclusion/exclusion criteria

All children living in Scotland (or other UK nation) who became eligible based on age for the relevant vaccine are included, with the exception of those registered to receive their second dose MMR immunisation in HSCPs associated with NHS Grampian. This is because this immunisation is offered to children when they turn 4 years of age in Grampian, rather than when they turn 3 years and 4 months of age as in all other Board areas.

Note 1: During this period, some children would become eligible for more than one set of immunisations (for example a child aged 8 weeks in January 2020, would become eligible for first, second and third doses of 6in1 vaccine during the study period). These children are included for each separate dose.

Note 2: A very small number of children would be medically exempt from the MMR vaccine as it is a live vaccine, however these children are still included as eligible for the purposes of this analysis.

Note 3: It is possible for parents to consent to receive selected vaccines only (for example to decline the MMR, but still receive the other vaccines offered at 1 year of age), therefore caution must be taken if extrapolating these data to represent uptake of the other pre-school immunisations for which data are not currently publicly available.

## 12 Sample size calculation

Taking in entire eligible population

## 13 Data and data validation

### 14 Data variables available

Table 2 Available variables (Scottish dataset)

| Variable                                        | Description                                                                                                                                          | Values                                                                                                                                                         |
|-------------------------------------------------|------------------------------------------------------------------------------------------------------------------------------------------------------|----------------------------------------------------------------------------------------------------------------------------------------------------------------|
| Vaccine type                                    | Type of preschool immunisation vaccine                                                                                                               | First dose 6in1 (8 weeks)<br>Second dose 6in1 (12 weeks)<br>Third dose 6in1 (16 weeks)<br>First dose MMR (12 months)<br>Second dose MMR (3 years and 4 months) |
| Area name                                       | Splits into Scotland as a whole, NHS Health Boards and HSCP                                                                                          | Scotland<br>NHS Health Boards<br>HSCP                                                                                                                          |
| Time-period                                     | Time-period when preschool child was eligible for immunisation                                                                                       | 2019 (baseline),<br>January to September 2020 (Monthly)<br>Week beginning 02 March to 28 September 2020 (Weekly)                                               |
| Total eligible                                  | The total number of eligible preschool children                                                                                                      | N                                                                                                                                                              |
| Total uptake within 4 weeks of eligibility (N)* | The number of preschool children who received vaccination within 4 weeks of becoming eligible                                                        | N                                                                                                                                                              |
| Total uptake within 4 weeks of eligibility (%)  | The number of preschool children who received vaccination within 4 weeks of becoming eligible out of the total number of eligible preschool children | % [0,100]                                                                                                                                                      |
| SIMD Quintile (for Scotland level data only)    | Scottish Index of Multiple Deprivation (SMID) index                                                                                                  | 1 (most deprived), 2, 3, 4, 5 (least deprived)                                                                                                                 |

\*Note: Data are available for total uptake at later ages (for example 6 months of age). However, we have chosen to examine uptake within 4 weeks of eligibility as this represents timely uptake of vaccinations as per the recommended schedule.

### 15 Constructed variables

Table 3 Constructed variables

| Variable                      | Description                                                                                     | Values       |
|-------------------------------|-------------------------------------------------------------------------------------------------|--------------|
| Absolute change from 2019 (%) | % uptake within 4 weeks of eligibility in 2020 – % uptake within 4 weeks of eligibility in 2019 | [-100,100] % |

|                               |                                                                                |            |
|-------------------------------|--------------------------------------------------------------------------------|------------|
| Relative change from 2019 (%) | Absolute change from 2019 (%) / % uptake within 4 weeks of eligibility in 2019 | [-1,Inf] % |
|-------------------------------|--------------------------------------------------------------------------------|------------|

## 16 Consistency and error checking

Data quality has already been checked by PHS.

## 17 Statistical analyses

The following sections are presented separately for each analytical objective. All analyses will be conducted for data from Scotland. Depending on the data available for the other UK nations, similar analyses will be conducted in parallel. At present, the variations in data (in terms of collection methods and availability and varying vaccination policies) suggest that pooling the UK data or conducting a meta-analysis would not be appropriate, however any differing trends may be discussed in a descriptive manner.

18 Objective a) Describe the impact of the COVID-19 pandemic on the uptake of immunisations provided at each of the five immunisation contacts offered to pre-school children

## 19 Outcome

The primary outcome is the % uptake of preschool immunisations (represented by uptake of one of the vaccines due at that age) within 4 weeks of eligibility. As a secondary outcome, the % uptake of preschool immunisations by 6 months of age (first dose 6in1) or 16 -18 months of age (first dose MMR) may also be considered to allow for comparisons with data from other nations (TBC).

## 20 Exposures of interest

Time, specifically in time-periods: 2019 (baseline), 01 Jan- 22 Mar 2020 (pre-lockdown), 23 Mar-final week Jul 2020 (lockdown) and Aug-end of Sept 2020 (post lockdown). The start date to 23 Mar has been chosen to correspond with the beginning of the UK wide lockdown as announced by the UK government. The end of the lockdown period is less well-defined and varied both in approach and timescale between Scotland, England, Wales and Northern Ireland. Broadly speaking, by the end of July, there was a substantial reduction in 'lockdown' restrictions with the opening of many non-essential businesses and limited indoor meeting between households permitted, therefore a pragmatic approach has been taken to define the lockdown period as 23 Mar 2020 until end Jul 2020. The data included in each time period are shown in Table 4.

Table 4 Definition of time periods

| Time period        | Data included                                                                                              |
|--------------------|------------------------------------------------------------------------------------------------------------|
| Baseline 2019      | Aggregate data for whole of 2019                                                                           |
| Pre-Lockdown 2020  | Monthly data for Jan 2020 and Feb 2020.<br>Weekly data from W/B 2Mar2020 up to and including W/B 16Mar2020 |
| Lockdown 2020      | Weekly data from W/B 23Mar2020 up to and including W/B 27Jul2020                                           |
| Post lockdown 2020 | Weekly data from W/B 3Aug2020 up to and including W/B 28Sept2020                                           |

The primary outcome of interest is comparison between baseline 2019 and lockdown 2020 for each vaccine. Of secondary interest are comparisons between baseline 2019 and pre-lockdown 2020, baseline 2019 and post lockdown 2020, pre-lockdown 2020 and lockdown 2020, lockdown 2020 and post lockdown 2020.

## 21 Analytical techniques

To compare the % uptake of preschool immunisation across time-periods we will visualise the total % uptake within 4 weeks of eligibility for each time-period by vaccine in a bar plot.

To statistically test whether these uptake rates are different, we will perform a binary logistical regression analysis for aggregate data, using time period as the explanatory variable, and vaccination status (vaccinated or unvaccinated) as the dependent variable. Separate analyses will be carried out for each vaccine. Odds ratios with 95% confidence intervals will be calculated using 2019 as the baseline comparator.

The following tables will be utilised:

*Table 5 Odds of being vaccinated between time-periods for each vaccine visit*

| Vaccine          | Time-period comparison                        | Odds ratio | 95% CI |
|------------------|-----------------------------------------------|------------|--------|
| First dose 6in1  | 2019 vs pre-lockdown (secondary outcome)      |            |        |
|                  | <b>2019 vs lockdown (primary outcome)</b>     |            |        |
|                  | Pre-lockdown vs lockdown (secondary outcome)  |            |        |
|                  | 2019 vs post-lockdown (secondary outcome)     |            |        |
|                  | Lockdown vs post-lockdown (secondary outcome) |            |        |
| Second dose 6in1 | 2019 vs pre-lockdown (secondary outcome)      |            |        |
|                  | <b>2019 vs lockdown (primary outcome)</b>     |            |        |
|                  | Pre-lockdown vs lockdown (secondary outcome)  |            |        |
|                  | 2019 vs post-lockdown (secondary outcome)     |            |        |
|                  | Lockdown vs post-lockdown (secondary outcome) |            |        |
| ...              |                                               |            |        |
| Second dose MMR  | 2019 vs pre-lockdown (secondary outcome)      |            |        |



|  |                                               |  |  |
|--|-----------------------------------------------|--|--|
|  | <b>2019 vs lockdown (primary outcome)</b>     |  |  |
|  | Pre-lockdown vs lockdown (secondary outcome)  |  |  |
|  | 2019 vs post-lockdown (secondary outcome)     |  |  |
|  | Lockdown vs post-lockdown (secondary outcome) |  |  |

## **22 Potential confounders**

None available since aggregated data

## **23 Potential effect modifiers**

None at this stage

## **24 Sub-group analysis**

None

## **25 Corrections for multiple testing**

None

## **26 Sensitivity analysis**

None

## **27 Other analysis**

None

28 Objective bi) Explore the difference in impact between geographical areas

## **29 Outcome**

Absolute/relative difference in % uptake within 4 weeks of eligibility during lockdown vs 2019 for each Health and Social Care Partnership (HSCP).

## **30 Exposures of interest**

Geographical area, specifically HSCP (excluding partnership areas within NHS Grampian for the MMR second dose only).

## **31 Analytical techniques**

To visualise the spatial distribution of the difference in lockdown and 2019, the % differences will be plotted in a choropleth map of Scotland segmented into HSCPs. This map will have each HSCP area coloured according to the % difference. This will be repeated for each vaccine type.

To statistically test whether these uptake rates are different between time periods for each HSCP, we will perform a binary logistical regression analysis for aggregate data, using vaccination status (vaccinated or unvaccinated) as the dependent variable and time period as the explanatory variable, specifying an interaction with HSCP. Separate analyses will be carried out for each vaccine. Odds ratios with 95% confidence intervals will be calculated using 2019 as the baseline comparator and results will be visualised using forest plots. The following table will be used (one for each vaccine):

*Table 6 Odds of being vaccinated between time-periods by HSCP*

| Time-period      | Variable      | Difference % | Odds ratio | 95% CI |
|------------------|---------------|--------------|------------|--------|
| 2019 vs lockdown | Aberdeen City |              |            |        |
|                  | Aberdeenshire |              |            |        |
|                  | Angus         |              |            |        |
|                  | ...           |              |            |        |

### **32 Potential confounders**

None

### **33 Potential effect modifiers**

None

### **34 Sub-group analysis**

None

### **35 Corrections for multiple testing**

None

### **36 Sensitivity analysis**

None

### **37 Other analysis**

None

38 Objective bii) Explore the difference in impact between socio-economic deprivation

## 39 Outcome

Absolute/relative difference in % uptake within 4 weeks of eligibility during lockdown vs total 2019 by SMID quintile.

## 40 Exposures of interest

Scottish Index of Multiple Deprivation (SIMD) quintiles

## 41 Analytical techniques

To explore the difference in the % uptake during lockdown (23Mar-Jul 2020) versus 2019 across the deprivation quintiles, we will plot the % difference for each vaccine by the SIMD quintile in a bar plot.

To statistically test whether these uptake rates are different between time periods for each SMID quintile, we will perform a binary logistical regression analysis for aggregate data, using time period as the explanatory variable, and vaccination status (vaccinated or unvaccinated) as the dependent variable, specifying an interaction with SIMD quintile. Separate analyses will be carried out for each vaccine. Odds ratios with 95% confidence intervals will be calculated using 2019 as the baseline comparator. The following tables will be utilised (one for each vaccine):

*Table 7 Odds of being vaccinated between time-periods by SMID*

| Time-period      | Variable | Difference % | Odds ratio | 95% CI |
|------------------|----------|--------------|------------|--------|
| 2019 vs lockdown | SMID 1   |              |            |        |
|                  | SMID 2   |              |            |        |
|                  | SMID 3   |              |            |        |
|                  | SMID 4   |              |            |        |
|                  | SMID 5   |              |            |        |

A similar technique will be carried out to determine the odds of being vaccinated by SMID quintile at each time point (2019 and lockdown), using SMID 1 (most deprived) as the baseline comparator, to assess for change in the inequality between SMID quintiles between the two time periods.

## 42 Potential confounders

None

### **43 Potential effect modifiers**

None

### **44 Sub-group analysis**

None

### **45 Corrections for multiple testing**

None

### **46 Sensitivity analysis**

None

### **47 Other analysis**

None

### 48 Missing data

As noted in section 3.6, for analyses relating to the second dose of MMR only, data relating to children registered to receive their immunisations in HSCP within NHS Grampian will be excluded. This is because this immunisation is offered to children when they turn 4 years of age in Grampian, rather than when they turn 3 years and 4 months of age as in all other Board areas.

A small number of children have missing information on HSCP area of residence and/or SIMD quintile. Numbers with missing data will be provided as supporting information for the analyses by HSCP and SIMD. No information is provided through the PHS dashboard on immunisation uptake for children with missing HSCP/SIMD data so this will not be reported.

### 49 Statistical software

All analyses will be performed on R/R Studio (4.0.3)

## 50 Reporting results

### 51 Reporting guidelines and conventions

Results will be reported according to STROBE (11) and RECORD (12) (via the COVID-19 extension) guidelines. P-values will be quoted to two decimal places, unless they are less than 0.001 (whereby the p-value will be given as <0.001) or between <0.005 and >0.001, in which case they will be stated to three decimal places. We will report 95% confidence intervals and if the confidence intervals cross 1, the results will not be considered statistically significant.

### 52 Dissemination

The analysis will be written in a manuscript and submitted to a peer reviewed journal. The chosen journal we have decided to aim for is the BMJ.

We will distribute finding to leads for immunisation policy and delivery in the Scottish government, Public Health Scotland, and territorial NHS Boards through the Scottish Immunisation Group. Results will also be shared with equivalent bodies of other UK nations. Findings will also be discussed with the Royal College of Paediatrics and Child Health and *British Association for Child and Adolescent Public Health* and may be presented at local, regional, national and/or international meetings.

Key messages will be made into an infographic to be disseminated on social media and communication channels. All code will be made publicly available via the EAVE II GitHub (<https://github.com/EAVE-II>).

## 53 References

1. Scottish Government, Re-mobilise, Recoved, Re-design: the feamework for NHS Scotland, 2020.
2. Mulholland RH, Wood R, Stagg HR, Fischbacher C, Villacampa J, Simpson CR, et al. Impact of COVID-19 on accident and emergency attendances and emergency and planned hospital admissions in Scotland: an interrupted time-series analysis. *J R Soc Med*. 2020;113(11):444-53.
3. Swann OV, Holden KA, Turtle L, Pollock L, Fairfield CJ, Drake TM, et al. Clinical characteristics of children and young people admitted to hospital with covid-19 in United Kingdom: prospective multicentre observational cohort study. *BMJ*. 2020;370:m3249.
4. Dong Y, Mo X, Hu Y, Qi X, Jiang F, Jiang Z, et al. Epidemiology of COVID-19 Among Children in China. *Pediatrics*. 2020;145(6).
5. Viner RM, Mytton OT, Bonell C, Melendez-Torres GJ, Ward J, Hudson L, et al. Susceptibility to SARS-CoV-2 Infection Among Children and Adolescents Compared With Adults: A Systematic Review and Meta-analysis. *JAMA Pediatr*. 2020.
6. Araújo LA, Veloso CF, Souza MC, Azevedo JMC, Tarro G. The potential impact of the COVID-19 pandemic on child growth and development: a systematic review. *J Pediatr (Rio J)*. 2020.
7. Royal College of Paediatrics and Child Health workforce team . The impact of COVID - 19 on child health services - report. 2020. Available from <https://www.rcpch.ac.uk/resources/impact-covid-19-child-health-services-report>
8. Saxena S, Skirrow H, Bedford H. Routine vaccination during covid-19 pandemic response. *BMJ*. 2020;369:m2392.
9. Public Health England. Complete routine immunisation schedule from January 2020 2020 [updated June 2020. Available from: [https://assets.publishing.service.gov.uk/government/uploads/system/uploads/attachment\\_data/file/899423/PHE\\_Complete\\_Immunisation\\_Schedule\\_Jun2020\\_05.pdf](https://assets.publishing.service.gov.uk/government/uploads/system/uploads/attachment_data/file/899423/PHE_Complete_Immunisation_Schedule_Jun2020_05.pdf).
10. Public Health England. Investigation of novel SARS - C o V - 2 variant. 2020.
11. von Elm E, Altman DG, Egger M, Pocock SJ, Gøtzsche PC, Vandenbroucke JP, et al. The Strengthening the Reporting of Observational Studies in Epidemiology (STROBE) statement: guidelines for reporting observational studies. *J Clin Epidemiol*. 2008;61(4):344-9.
12. Benchimol EI, Smeeth L, Guttman A, Harron K, Moher D, Petersen I, et al. The REporting of studies Conducted using Observational Routinely-collected health Data (RECORD) statement. *PLoS Med*. 2015;12(10):e1001885.

## **S2 File Supplementary methods**

### *Additional inclusion/exclusion criteria*

During the study period, some children would become eligible for more than one set of immunisations (for example, a child aged 8 weeks in January 2020, would become eligible for first, second and third doses of 6in1 vaccine during the study period) and these children were included for each separate dose. Of note, a very small number of children would be medically exempt from the MMR vaccine as it is a live vaccine (15), however these children are still included as eligible for the purposes of this analysis. For the analyses of the second dose MMR only, we excluded children registered to receive this vaccine in Health and Social Partnerships associated with NHS Grampian (Aberdeen City, Aberdeenshire and Moray) as this immunisation is offered to children when they turn 4 years of age in Grampian, rather than when they turn 3 years and 4 months of age as in all other areas.

### *Additional information on data sources*

#### *Scotland*

The “COVID19 wider impacts on the health care system” dashboard was set up by Public Health Scotland in response to the COVID-19 pandemic to provide near real-time updates from a range of national databases on topics ranging from child health to cancer, thus allowing for rapid analysis of trends (19). (18). Data for childhood immunisations were drawn monthly from the Scottish Immunisation & Recall System (SIRS), an electronic system used by all NHS boards in Scotland by which information on children eligible for and receiving routine preschool immunisation is recorded by administrative staff within the relevant NHS board (19). The code used by Public Health Scotland to produce the wider impacts dashboard can be accessed at <https://github.com/Public-Health-Scotland/covid-wider-impacts>.



Data were available for all children living in Scotland and eligible for the five immunisations of interest with the above noted exceptions. For 2019, aggregate data for the entire year were used, while for 2020, monthly data were used for January and February 2020, then weekly from 2<sup>nd</sup> March 2020 (table S1). For the island HSCPs (Shetland, Orkney and the Western Isles), and for England, only monthly data were available therefore lockdown was defined as the months April to July inclusive.

Of note, data checking by Public Health Scotland revealed that a changes to the reporting database to include scheduling for some adult immunisations meant that a small number of older adults born in 1920 were included in the denominator for the January 2020 data (further details can be found in the 23 December release commentary on <https://scotland.shinyapps.io/phs-covid-wider-impact/>). It was not possible to remove these older adult records, therefore, uptake rates for January 2020 may have been slightly under-reported. This fault was rectified by the next dashboard update in February.

### S3 File

The RECORD statement – checklist of items, extended from the STROBE statement, that should be reported in observational studies using routinely collected health data.

|                           | Item No. | STROBE items                                                                                                                                                                               | Location in manuscript where items are reported | RECORD items                                                                                                                                                                                                                                                                                                                                                                                                                                | Location in manuscript where items are reported                                   |
|---------------------------|----------|--------------------------------------------------------------------------------------------------------------------------------------------------------------------------------------------|-------------------------------------------------|---------------------------------------------------------------------------------------------------------------------------------------------------------------------------------------------------------------------------------------------------------------------------------------------------------------------------------------------------------------------------------------------------------------------------------------------|-----------------------------------------------------------------------------------|
| <b>Title and abstract</b> |          |                                                                                                                                                                                            |                                                 |                                                                                                                                                                                                                                                                                                                                                                                                                                             |                                                                                   |
|                           | 1        | (a) Indicate the study's design with a commonly used term in the title or the abstract (b) Provide in the abstract an informative and balanced summary of what was done and what was found | Title page (page 1-3)<br>Abstract (page 4)      | RECORD 1.1: The type of data used should be specified in the title or abstract. When possible, the name of the databases used should be included.<br><br>RECORD 1.2: If applicable, the geographic region and timeframe within which the study took place should be reported in the title or abstract.<br><br>RECORD 1.3: If linkage between databases was conducted for the study, this should be clearly stated in the title or abstract. | Title page (page 1-3)<br>Abstract (page 4)<br>Further details in methods (page 7) |
| <b>Introduction</b>       |          |                                                                                                                                                                                            |                                                 |                                                                                                                                                                                                                                                                                                                                                                                                                                             |                                                                                   |
| Background rationale      | 2        | Explain the scientific background and rationale for the investigation being reported                                                                                                       | Introduction (page 6)                           |                                                                                                                                                                                                                                                                                                                                                                                                                                             |                                                                                   |
| Objectives                | 3        | State specific objectives, including any prespecified hypotheses                                                                                                                           | Abstract (page 4)<br>Methods (page 7-8)         |                                                                                                                                                                                                                                                                                                                                                                                                                                             |                                                                                   |

|                |   |                                                                                                                                                                                                                                                                                                                                                                                                                                                                                                                                                                                                                                                                                                                              |                                                 |                                                                                                                                                                                                                                                                                                                                                                                                                                                                                                                                                                                                                                                                                                      |                                                                                                                                                                             |
|----------------|---|------------------------------------------------------------------------------------------------------------------------------------------------------------------------------------------------------------------------------------------------------------------------------------------------------------------------------------------------------------------------------------------------------------------------------------------------------------------------------------------------------------------------------------------------------------------------------------------------------------------------------------------------------------------------------------------------------------------------------|-------------------------------------------------|------------------------------------------------------------------------------------------------------------------------------------------------------------------------------------------------------------------------------------------------------------------------------------------------------------------------------------------------------------------------------------------------------------------------------------------------------------------------------------------------------------------------------------------------------------------------------------------------------------------------------------------------------------------------------------------------------|-----------------------------------------------------------------------------------------------------------------------------------------------------------------------------|
|                |   |                                                                                                                                                                                                                                                                                                                                                                                                                                                                                                                                                                                                                                                                                                                              | Pre-specified analysis plan (supplemental data) |                                                                                                                                                                                                                                                                                                                                                                                                                                                                                                                                                                                                                                                                                                      |                                                                                                                                                                             |
| <b>Methods</b> |   |                                                                                                                                                                                                                                                                                                                                                                                                                                                                                                                                                                                                                                                                                                                              |                                                 |                                                                                                                                                                                                                                                                                                                                                                                                                                                                                                                                                                                                                                                                                                      |                                                                                                                                                                             |
| Study Design   | 4 | Present key elements of study design early in the paper                                                                                                                                                                                                                                                                                                                                                                                                                                                                                                                                                                                                                                                                      | Methods (page 7-8)                              |                                                                                                                                                                                                                                                                                                                                                                                                                                                                                                                                                                                                                                                                                                      |                                                                                                                                                                             |
| Setting        | 5 | Describe the setting, locations, and relevant dates, including periods of recruitment, exposure, follow-up, and data collection                                                                                                                                                                                                                                                                                                                                                                                                                                                                                                                                                                                              | Methods (page 7-8)                              |                                                                                                                                                                                                                                                                                                                                                                                                                                                                                                                                                                                                                                                                                                      |                                                                                                                                                                             |
| Participants   | 6 | <p><i>(a) Cohort study</i> - Give the eligibility criteria, and the sources and methods of selection of participants. Describe methods of follow-up</p> <p><i>Case-control study</i> - Give the eligibility criteria, and the sources and methods of case ascertainment and control selection. Give the rationale for the choice of cases and controls</p> <p><i>Cross-sectional study</i> - Give the eligibility criteria, and the sources and methods of selection of participants</p> <p><i>(b) Cohort study</i> - For matched studies, give matching criteria and number of exposed and unexposed</p> <p><i>Case-control study</i> - For matched studies, give matching criteria and the number of controls per case</p> | Methods (page 7-8)                              | <p>RECORD 6.1: The methods of study population selection (such as codes or algorithms used to identify subjects) should be listed in detail. If this is not possible, an explanation should be provided.</p> <p>RECORD 6.2: Any validation studies of the codes or algorithms used to select the population should be referenced. If validation was conducted for this study and not published elsewhere, detailed methods and results should be provided.</p> <p>RECORD 6.3: If the study involved linkage of databases, consider use of a flow diagram or other graphical display to demonstrate the data linkage process, including the number of individuals with linked data at each stage.</p> | <p>Methods (page 7-8)</p> <p>Code used to analysis data will be made publicly available at <a href="https://github.com/EAVE-II">https://github.com/EAVE-II</a> (page 8)</p> |

|                              |    |                                                                                                                                                                                                             |                                                                                               |                                                                                                                                                                                                                 |                                                                                                                                                                  |
|------------------------------|----|-------------------------------------------------------------------------------------------------------------------------------------------------------------------------------------------------------------|-----------------------------------------------------------------------------------------------|-----------------------------------------------------------------------------------------------------------------------------------------------------------------------------------------------------------------|------------------------------------------------------------------------------------------------------------------------------------------------------------------|
| Variables                    | 7  | Clearly define all outcomes, exposures, predictors, potential confounders, and effect modifiers. Give diagnostic criteria, if applicable.                                                                   | Methods (page 7-8)                                                                            | RECORD 7.1: A complete list of codes and algorithms used to classify exposures, outcomes, confounders, and effect modifiers should be provided. If these cannot be reported, an explanation should be provided. | Methods (page 7-8)<br>Code used to analysis data will be made publicly available at <a href="https://github.com/EAVE-II">https://github.com/EAVE-II</a> (page 8) |
| Data sources/<br>measurement | 8  | For each variable of interest, give sources of data and details of methods of assessment (measurement). Describe comparability of assessment methods if there is more than one group                        | Methods (page 7-8)                                                                            |                                                                                                                                                                                                                 |                                                                                                                                                                  |
| Bias                         | 9  | Describe any efforts to address potential sources of bias                                                                                                                                                   | Methods (page 7-8)<br>Discussion (page 12)                                                    |                                                                                                                                                                                                                 |                                                                                                                                                                  |
| Study size                   | 10 | Explain how the study size was arrived at                                                                                                                                                                   | Methods (page 7-8)                                                                            |                                                                                                                                                                                                                 |                                                                                                                                                                  |
| Quantitative variables       | 11 | Explain how quantitative variables were handled in the analyses. If applicable, describe which groupings were chosen, and why                                                                               | Methods (page 7-8)                                                                            |                                                                                                                                                                                                                 |                                                                                                                                                                  |
| Statistical methods          | 12 | (a) Describe all statistical methods, including those used to control for confounding<br>(b) Describe any methods used to examine subgroups and interactions<br>(c) Explain how missing data were addressed | Methods (page 7-8)<br>Pre-specified analysis plan (supplemental data)<br>Supplemental methods |                                                                                                                                                                                                                 |                                                                                                                                                                  |

|                                  |  |                                                                                                                                                                                                                                                                                                                                                                          |                                                                                                              |                                                                                                                                                                                                                                                                     |                                                                                                              |
|----------------------------------|--|--------------------------------------------------------------------------------------------------------------------------------------------------------------------------------------------------------------------------------------------------------------------------------------------------------------------------------------------------------------------------|--------------------------------------------------------------------------------------------------------------|---------------------------------------------------------------------------------------------------------------------------------------------------------------------------------------------------------------------------------------------------------------------|--------------------------------------------------------------------------------------------------------------|
|                                  |  | <p>(d) <i>Cohort study</i> - If applicable, explain how loss to follow-up was addressed</p> <p><i>Case-control study</i> - If applicable, explain how matching of cases and controls was addressed</p> <p><i>Cross-sectional study</i> - If applicable, describe analytical methods taking account of sampling strategy</p> <p>(e) Describe any sensitivity analyses</p> |                                                                                                              |                                                                                                                                                                                                                                                                     |                                                                                                              |
| Data access and cleaning methods |  | ..                                                                                                                                                                                                                                                                                                                                                                       | <p>Methods (page 7-8)</p> <p>Pre-specified analysis plan (supplemental data)</p> <p>Supplemental methods</p> | <p>RECORD 12.1: Authors should describe the extent to which the investigators had access to the database population used to create the study population.</p> <p>RECORD 12.2: Authors should provide information on the data cleaning methods used in the study.</p> | <p>Methods (page 7-8)</p> <p>Pre-specified analysis plan (supplemental data)</p> <p>Supplemental methods</p> |
| Linkage                          |  | ..                                                                                                                                                                                                                                                                                                                                                                       |                                                                                                              | <p>RECORD 12.3: State whether the study included person-level, institutional-level, or other data linkage across two or more databases. The methods of linkage and methods of linkage quality evaluation should be provided.</p>                                    | <p>Methods (page 7-8)</p> <p>Pre-specified analysis plan (supplemental data)</p> <p>Supplemental methods</p> |
| <b>Results</b>                   |  |                                                                                                                                                                                                                                                                                                                                                                          |                                                                                                              |                                                                                                                                                                                                                                                                     |                                                                                                              |

|                  |    |                                                                                                                                                                                                                                                                                                                                                 |                                                                     |                                                                                                                                                                                                                                                                                                                    |                                           |
|------------------|----|-------------------------------------------------------------------------------------------------------------------------------------------------------------------------------------------------------------------------------------------------------------------------------------------------------------------------------------------------|---------------------------------------------------------------------|--------------------------------------------------------------------------------------------------------------------------------------------------------------------------------------------------------------------------------------------------------------------------------------------------------------------|-------------------------------------------|
| Participants     | 13 | (a) Report the numbers of individuals at each stage of the study ( <i>e.g.</i> , numbers potentially eligible, examined for eligibility, confirmed eligible, included in the study, completing follow-up, and analysed)<br>(b) Give reasons for non-participation at each stage.<br>(c) Consider use of a flow diagram                          | Non applicable                                                      | RECORD 13.1: Describe in detail the selection of the persons included in the study ( <i>i.e.</i> , study population selection) including filtering based on data quality, data availability and linkage. The selection of included persons can be described in the text and/or by means of the study flow diagram. | Whole population therefore non-applicable |
| Descriptive data | 14 | (a) Give characteristics of study participants ( <i>e.g.</i> , demographic, clinical, social) and information on exposures and potential confounders<br>(b) Indicate the number of participants with missing data for each variable of interest<br>(c) <i>Cohort study</i> - summarise follow-up time ( <i>e.g.</i> , average and total amount) | Results (page 10-11)<br>Supplemental tables<br>Discussion (page 12) |                                                                                                                                                                                                                                                                                                                    |                                           |
| Outcome data     | 15 | <i>Cohort study</i> - Report numbers of outcome events or summary measures over time<br><i>Case-control study</i> - Report numbers in each exposure category, or summary measures of exposure<br><i>Cross-sectional study</i> - Report numbers of outcome events or summary measures                                                            | Non-applicable                                                      |                                                                                                                                                                                                                                                                                                                    |                                           |
| Main results     | 16 | (a) Give unadjusted estimates and, if applicable, confounder-                                                                                                                                                                                                                                                                                   | Results,<br>supplemental tables                                     |                                                                                                                                                                                                                                                                                                                    |                                           |

|                   |    |                                                                                                                                                                                                                                                                                                                                                    |                             |                                                                                                                                                                                                                                                                                                          |                         |
|-------------------|----|----------------------------------------------------------------------------------------------------------------------------------------------------------------------------------------------------------------------------------------------------------------------------------------------------------------------------------------------------|-----------------------------|----------------------------------------------------------------------------------------------------------------------------------------------------------------------------------------------------------------------------------------------------------------------------------------------------------|-------------------------|
|                   |    | adjusted estimates and their precision (e.g., 95% confidence interval). Make clear which confounders were adjusted for and why they were included<br>(b) Report category boundaries when continuous variables were categorized<br>(c) If relevant, consider translating estimates of relative risk into absolute risk for a meaningful time period |                             |                                                                                                                                                                                                                                                                                                          |                         |
| Other analyses    | 17 | Report other analyses done—e.g., analyses of subgroups and interactions, and sensitivity analyses                                                                                                                                                                                                                                                  | Results (page 10-11)        |                                                                                                                                                                                                                                                                                                          |                         |
| <b>Discussion</b> |    |                                                                                                                                                                                                                                                                                                                                                    |                             |                                                                                                                                                                                                                                                                                                          |                         |
| Key results       | 18 | Summarise key results with reference to study objectives                                                                                                                                                                                                                                                                                           | Discussion (page 12)        |                                                                                                                                                                                                                                                                                                          |                         |
| Limitations       | 19 | Discuss limitations of the study, taking into account sources of potential bias or imprecision. Discuss both direction and magnitude of any potential bias                                                                                                                                                                                         | Discussion (page 12 and 13) | RECORD 19.1: Discuss the implications of using data that were not created or collected to answer the specific research question(s). Include discussion of misclassification bias, unmeasured confounding, missing data, and changing eligibility over time, as they pertain to the study being reported. | Discussion (page 12-13) |
| Interpretation    | 20 | Give a cautious overall interpretation of results considering objectives, limitations, multiplicity of analyses, results from similar studies, and other relevant evidence                                                                                                                                                                         | Discussion (page 13)        |                                                                                                                                                                                                                                                                                                          |                         |

|                                                           |    |                                                                                                                                                               |                                    |                                                                                                                                                          |                                                     |
|-----------------------------------------------------------|----|---------------------------------------------------------------------------------------------------------------------------------------------------------------|------------------------------------|----------------------------------------------------------------------------------------------------------------------------------------------------------|-----------------------------------------------------|
| Generalisability                                          | 21 | Discuss the generalisability (external validity) of the study results                                                                                         | Discussion (page 13)               |                                                                                                                                                          |                                                     |
| <b>Other Information</b>                                  |    |                                                                                                                                                               |                                    |                                                                                                                                                          |                                                     |
| Funding                                                   | 22 | Give the source of funding and the role of the funders for the present study and, if applicable, for the original study on which the present article is based | Title (page 3)<br>Methods (page 9) |                                                                                                                                                          |                                                     |
| Accessibility of protocol, raw data, and programming code |    | ..                                                                                                                                                            |                                    | RECORD 22.1: Authors should provide information on how to access any supplemental information such as the study protocol, raw data, or programming code. | Data sharing statement (page 2)<br>Methods (page 8) |

\*Reference: Benchimol EI, Smeeth L, Guttman A, Harron K, Moher D, Petersen I, Sørensen HT, von Elm E, Langan SM, the RECORD Working Committee. The REporting of studies Conducted using Observational Routinely-collected health Data (RECORD) Statement. *PLoS Medicine* 2015; in press.

\*Checklist is protected under Creative Commons Attribution ([CC BY](https://creativecommons.org/licenses/by/4.0/)) license.
